# Supplementary material for: Desymmetrization of aziridine with malononitrile using cinchona alkaloid amide/zinc(ii) catalysts
Source: Royal Society of Chemistry journal article supplement (doi:10.1039/c6cc09457k), 2017-01-01
Supplement: c6cc09457k1.pdf [file c6cc09457k1.pdf]

## Supporting Information

### Desymmetrization of Aziridine with Malononitrile using Cinchona Alkaloid Amide/Zinc(II) Catalysts

Noriyuki Shiomi,<sup>a,b</sup> Mami Kuroda,<sup>a</sup> Shuichi Nakamura\*,<sup>a,b</sup>

<sup>a</sup>Department of Life Science and Applied Chemistry, Graduate School of Engineering,  
Nagoya Institute of Technology, Gokiso, Showa-ku, Nagoya 466-8555 (Japan)

<sup>b</sup>Frontier Research Institute for Material Science, Nagoya Institute of Technology,  
Gokiso, Showa-ku, Nagoya 466-8555 (Japan)

#### General Methods:

All reactions were performed in oven-dried glassware under a positive pressure of argon. Solvents were transferred via syringe and were introduced into the reaction vessels through a rubber septum. All reactions were monitored by thin-layer chromatography (TLC) carried out on 0.25 mm Merck silica-gel (60-F254). The TLC plates were visualized with UV light and 7% phosphomolybdic acid or *p*-anisaldehyde in ethanol/heat. Column chromatography was carried out on a column packed with silica-gel 60N spherical neutral size 63-210  $\mu\text{m}$ . The  $^1\text{H}$  NMR (300 MHz),  $^{13}\text{C}$  NMR (75.5 MHz) spectra for solution in  $\text{CDCl}_3$ , were recorded on a Varian Gemini-300. Chemical shifts ( $\delta$ ) are expressed in ppm downfield from internal TMS or  $\text{CHCl}_3$ . HPLC analyses were performed on a JASCO PU-2080 Plus using 4.6 x 250 mm DAICEL CHIRALPAK column. ESI Mass spectra was recorded on a SHIMADZU LCMS-2050EV. Optical rotations were measured on a JASCO P-2200. Infrared spectra were recorded on a JASCO FT/IR-4600 spectrometer.

## Optimization of reaction conditions:

**Table S1.** Screening of Lewis acids.<sup>a</sup>

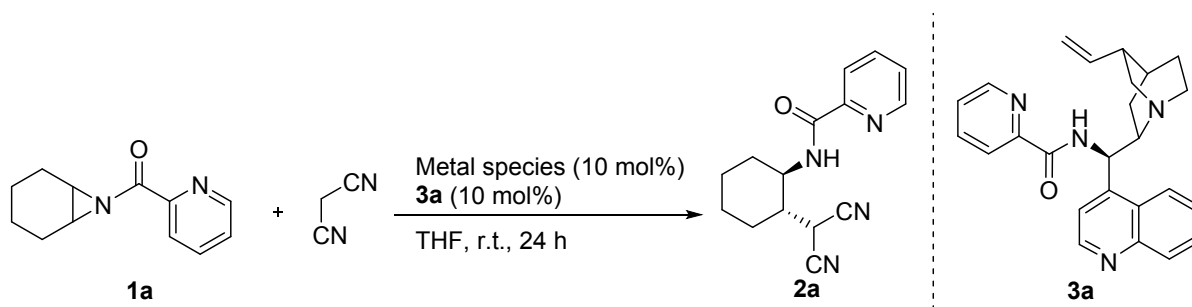

| Entry          | Metal species        | Yield (%) | Ee (%) <sup>b</sup> |
|----------------|----------------------|-----------|---------------------|
| 1              | none                 | -         | -                   |
| 2 <sup>c</sup> | Et <sub>2</sub> Zn   | 63        | 90                  |
| 3              | Zn(OAc) <sub>2</sub> | 53        | 11                  |
| 4              | Zn(OTf) <sub>2</sub> | 41        | 14                  |
| 5 <sup>d</sup> | Zn(OTf) <sub>2</sub> | 58        | 81                  |
| 6 <sup>d</sup> | Cu(OTf) <sub>2</sub> | 10        | 79                  |
| 7 <sup>d</sup> | Ni(OTf) <sub>2</sub> | 35        | 33 <sup>e</sup>     |
| 8 <sup>d</sup> | Sc(OTf) <sub>3</sub> | 16        | 0                   |

<sup>a</sup> Reaction condition; aziridine **1** (0.1 mmol), malononitrile (1.5 equiv.), Et<sub>2</sub>Zn (10 mol %), **3** (1 mol %) in THF (0.1 M) were used. <sup>b</sup> Ee was determined by HPLC analysis using a chiral column.

<sup>c</sup> Ligand **3** (12 mol%) was used. <sup>d</sup> Et<sub>3</sub>N (1.0 equiv.) was added. <sup>e</sup> Opposite enantiomer was obtained.

**Table S2.** Screening of ligands.<sup>a</sup>

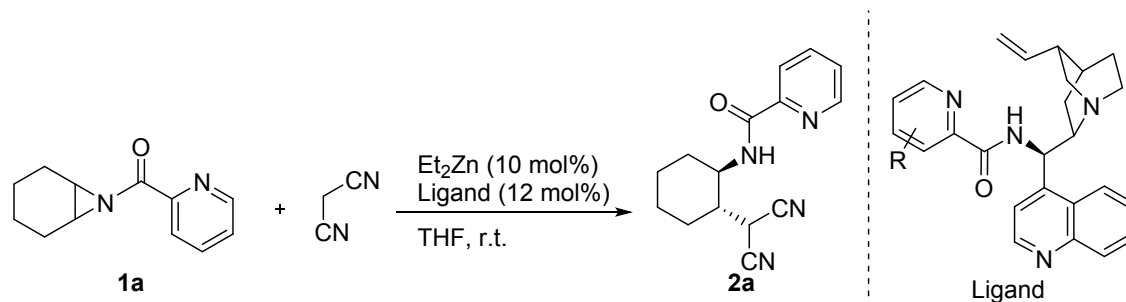

| Entry | R (chiral ligand) | Time (h) | Yield (%) | Ee (%) <sup>b</sup> |
|-------|-------------------|----------|-----------|---------------------|
| 1     | H                 | 6        | 74        | 88                  |
| 2     | 4-CF <sub>3</sub> | 20       | 45        | 24                  |
| 3     | 4-Cl              | 24       | 57        | 61                  |
| 4     | 4-OMe             | 12       | 71        | 91                  |
| 5     | 6-F               | 40       | 60        | 3 <sup>c</sup>      |
| 6     | 6-Me              | 32       | 54        | 30 <sup>c</sup>     |
| 7     | 6-OMe             | 32       | 60        | 6 <sup>c</sup>      |

<sup>a</sup> Reaction condition; aziridine **1** (0.1 mmol), malononitrile (5.0 equiv.), Et<sub>2</sub>Zn (10 mol %), ligand (12 mol %) in THF (0.2 M) were used. <sup>b</sup> Ee was determined by HPLC analysis using a chiral column.

<sup>c</sup> Opposite enantiomer was obtained.

**Table S3.** Screening of protecting groups.<sup>a</sup>

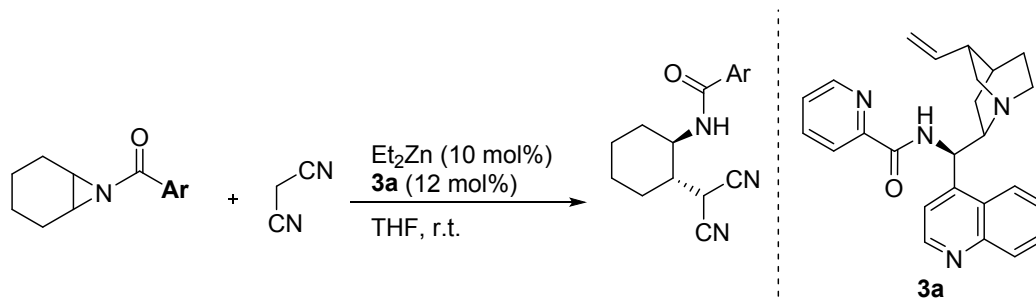

| Entry          | Ar | Time (h) | Yield (%) | Ee (%) <sup>b</sup> |
|----------------|----|----------|-----------|---------------------|
| 1              |    | 6        | 74        | 88                  |
| 2              |    | 72       | -         | -                   |
| 3              |    | 66       | trace     | -                   |
| 4              |    | 66       | 19        | 24                  |
| 5              |    | 17       | 69        | 81                  |
| 6              |    | 3        | 84        | 92                  |
| 7              |    | 6        | 88        | 95                  |
| 8              |    | 12       | 82        | 96                  |
| 9 <sup>c</sup> |    | 20       | 89        | 97                  |

<sup>a</sup> Reaction condition; aziridine **1** (0.1 mmol), malononitrile (5.0 equiv.), Et<sub>2</sub>Zn (10 mol %), **3** (12 mol %) in THF (0.2 M) were used. <sup>b</sup> Ee was determined by HPLC analysis using a chiral column.

<sup>c</sup> At 0 °C.

## General procedure for synthesis of *N*-(imidazolecarbonyl)aziridines:

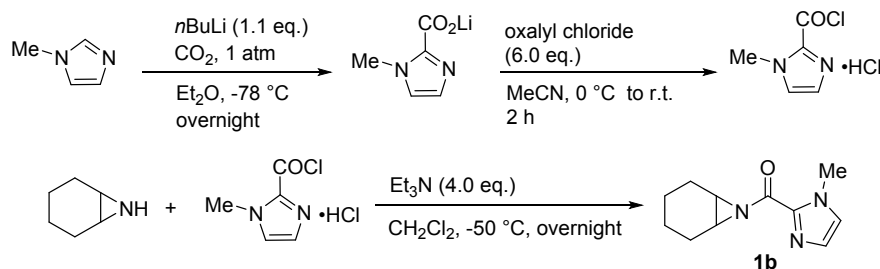

A solution of 1-methylimidazole (3.16 mL, 40 mmol) in Et<sub>2</sub>O (120 mL) was cooled to  $-78\text{ }^{\circ}\text{C}$  and added *n*-BuLi (1.6 M solution in Hexane, 44 mmol) dropwise. After stirring for 1 h, CO<sub>2</sub> gas was bubbled to the reaction mixture, and stirred overnight. The reaction mixture was filtrated and washed with Et<sub>2</sub>O, and dried in vacuo to afford lithium 1-methyl-1*H*-imidazole-2-carboxylate as a white solid in quantitative yield. This compound was used in the next step without futher purification.

To a solution of lithium 1-methyl-1*H*-imidazole-2-carboxylate (924 mg, 7.0 mmol) in CH<sub>3</sub>CN (10.5 mL), oxalyl chloride (3.6 mL, 42 mmol) was added dropwise at  $0\text{ }^{\circ}\text{C}$ . After stirring for 30 min at  $0\text{ }^{\circ}\text{C}$ , the reaction mixture was warmed to room temperature and stirred for 2 h. The volatile compounds were removed under reduced pressure, and the yellow crude compound was used in the next step immediately without futer purification.

7-Aza-bicyclo[4.1.0]heptane (340 mg, 3.5 mmol) in CH<sub>2</sub>Cl<sub>2</sub> (9.1 mL) was added Et<sub>3</sub>N (1.9 mL, mmol) and cooled to  $-50\text{ }^{\circ}\text{C}$ . 1-Methyl-1*H*-imidazole-2-carbonyl chloride hydrochloride (760 mg, 4.2 mmol) was added slowly to the reactin mixture and stirred for overnight. The mixture was added H<sub>2</sub>O and warmed to room temperature. The organic layer was separated and water layer was extracted with CH<sub>2</sub>Cl<sub>2</sub> twice. The combined organic layer was washed with brine, dried over Na<sub>2</sub>SO<sub>4</sub>, and concentrated under reduced pressure. The residue was purified by flash column chromatography (Hexane/AcOEt=70/30) to afford **1b** in 58% yield as a white solid.

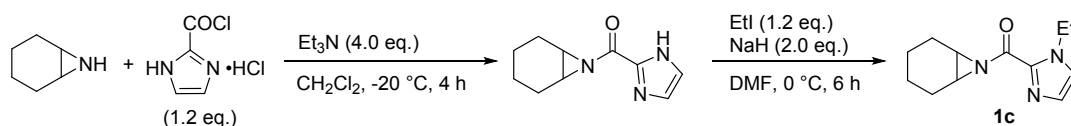

7-Aza-bicyclo[4.1.0]heptane (219 mg, 2.3 mmol) in CH<sub>2</sub>Cl<sub>2</sub> (5.6 mL) was cooled to  $-20\text{ }^{\circ}\text{C}$  and added Et<sub>3</sub>N (1.3 mL, 9.0 mmol) followed by imidazole-2-acylchloride hydrochloride salt (453 mg, 2.7 mmol) synthesized by previous report.<sup>1,2</sup> After stirring overnight, the reaction mixture was added H<sub>2</sub>O, and warmed to room temperature. The mixture was extracted with CH<sub>2</sub>Cl<sub>2</sub> three times and the combined organic layer was dried over Na<sub>2</sub>SO<sub>4</sub>, and concentrated under reduced pressure. The crude product was purified by flash chromatography (Hexane/AcOEt=50/50) to afford (7-azabicyclo[4.1.0]heptan-7-yl)(1*H*-imidazol-2-yl)methanone in 85% yield as a white solid.

A solution of (7-azabicyclo[4.1.0]heptan-7-yl)(1*H*-imidazol-2-yl)methanone (279 mg, 1.5 mmol)

in DMF (4.0 mL) was cooled to 0 °C and added NaH (117 mg, 60% mineral oil suspension, 2.9 mmol). After stirring for 30 min, ethyl iodide (0.14 mL, 1.8 mmol) was added dropwise. After stirring for 6 h, the reaction mixture was added H<sub>2</sub>O and warmed to room temperature. The reaction mixture extracted with AcOEt twice. The combined organic layer was washed with brine, dried over Na<sub>2</sub>SO<sub>4</sub>, and concentrated under reduced pressure. The residue was purified by flash column chromatography (Hexane/AcOEt=70/30) to afford **1c** in 40% yield as a white solid.

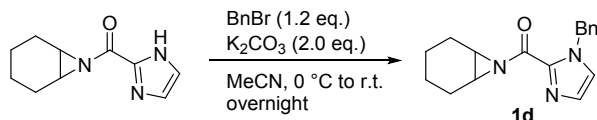

A solution of (7-azabicyclo[4.1.0]heptan-7-yl)(1H-imidazol-2-yl)methanone (191 mg, 1.0 mmol) and K<sub>2</sub>CO<sub>3</sub> (276 mg, 1.2 mmol) in MeCN (2.5 mL) was cooled to 0 °C and added benzyl bromide (0.14 mL, 1.2 mmol) dropwise. The reaction mixture was allowed to warm to room temperature and stirred overnight. The reaction mixture was diluted with MeCN and filtrated through celite, and the volatile compounds were removed under reduced pressure. The crude product was purified by silica gel column chromatography (Hexane/AcOEt=80/20) to afford **1d** in 58% yield as a white solid.

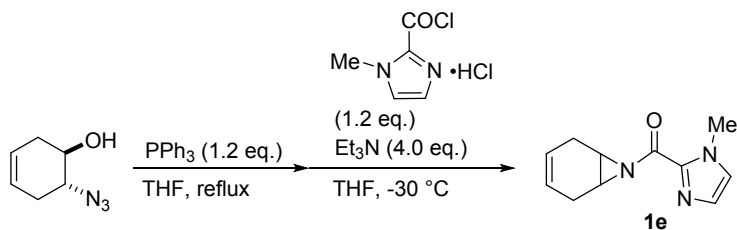

A solution of *trans*-6-azidocyclohex-3-enol (417 mg, 3.0 mmol) in THF (15 mL) was added triphenylphosphine (944 mg, 3.6 mmol) and refluxed for 5 h. The reaction mixture was cooled to -30 °C, and Et<sub>3</sub>N (1.67 mL, 12 mmol) was added to the solution followed by 1-methyl-1H-imidazole-2-carbonyl chloride hydrochloride (650 mg, 3.6 mmol) in portionwise. After stirring overnight, the reaction mixture was added H<sub>2</sub>O and warmed to room temperature. The mixture was extracted with CH<sub>2</sub>Cl<sub>2</sub> three times and the combined organic layer was dried over Na<sub>2</sub>SO<sub>4</sub>, and concentrated under reduced pressure. The crude product was purified by flash chromatography (Hexane/AcOEt=60/40) to afford **1e** in 51% yield as a white solid.

Compound **1f**, **1h** were prepared by similar method for the preparation of **1e**.

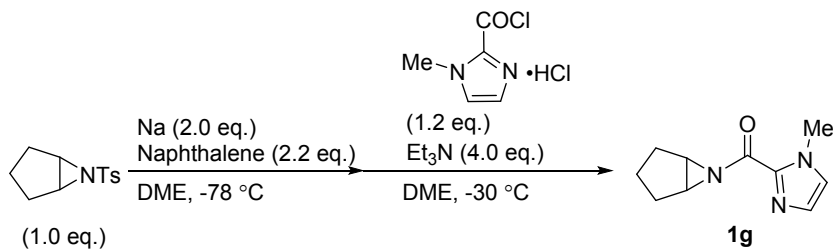

Chopped sodium metal (322 mg, 14 mmol) was added to a solution of naphthalene (1.97 g, 15.4

mmol) in 1,2-dimethoxyethane (12 mL) and stirred at room temperature for 1 h. The reaction mixture became a dark green solution, and it was added to a solution of 6-tosyl-6-azabicyclo[3.1.0]hexane (1.66 mg, 7.0 mmol) in 1,2-dimethoxyethane (24 mL) at  $-78^{\circ}\text{C}$ . After stirring for 1 h, the reaction mixture was added  $\text{H}_2\text{O}$  (0.25 mL), and stirred for 30 min at room temperature. Then,  $\text{MgSO}_4$  was added to the reaction mixture and stirred for 15 min. The precipitate was filtrated off through celite and washed with  $\text{Et}_2\text{O}$ . After removal of  $\text{Et}_2\text{O}$  under reduced pressure, the residue was cooled to  $-30^{\circ}\text{C}$ , and  $\text{Et}_3\text{N}$  (3.9 mL, 28 mmol) was added to the solution followed by 1-methyl-1*H*-imidazole-2-carbonyl chloride hydrochloride (1.52 g, 8.4 mmol) in portionwise. After stirring overnight, the reaction mixture was added  $\text{H}_2\text{O}$  and warmed to room temperature. The mixture was extracted with  $\text{AcOEt}$  three times and the combined organic layer was dried over  $\text{Na}_2\text{SO}_4$ , and concentrated under reduced pressure. The crude product was purified by flash chromatography (Hexane/ $\text{AcOEt}$ =50/50) to afford **1g** in 38% yield as a white solid. Compound **1i** was prepared by similar method for the preparation of **1g**.

**(7-Azabicyclo[4.1.0]heptan-7-yl)(1*H*-imidazol-2-yl)methanone;**

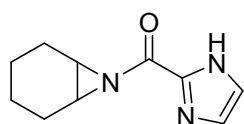

**m.p.** 111.8-112.4  $^{\circ}\text{C}$ ;  $^1\text{H}$  NMR (300 MHz,  $\text{CDCl}_3$ )  $\delta$  1.30-1.39 (m, 2H), 1.48-1.59 (m, 2H), 1.91-1.95 (m, 2H), 2.18-2.27 (m, 2H), 2.97-2.98 (m, 2H), 7.21 (d,  $J = 3.0$  Hz, 1H), 7.27 (d,  $J = 3.0$  Hz, 1H), 11.5 (br, 1H);  $^{13}\text{C}$  NMR (75 MHz,  $\text{CDCl}_3$ )  $\delta$  20.0, 23.8, 37.7, 119.8, 131.2, 141.3, 170.5; **IR** (ATR) 2945, 2910, 1665, 1389, 1310, 1198, 1092, 947, 799, 697  $\text{cm}^{-1}$ ; **HRMS** (ESI) calculated for  $\text{C}_{10}\text{H}_{13}\text{N}_3\text{NaO}^+$   $[\text{M}+\text{Na}]^+$  213.0956. found 214.0957.

**(7-Azabicyclo[4.1.0]heptan-7-yl)(1-methyl-1*H*-imidazol-2-yl)methanone (1b);**

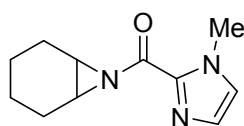

**m.p.** 57.8-58.8  $^{\circ}\text{C}$ ;  $^1\text{H}$  NMR (300 MHz,  $\text{CDCl}_3$ )  $\delta$  1.29-1.38 (m, 2H), 1.50-1.57 (m, 2H), 1.87-1.95 (m, 2H), 2.15-2.24 (m, 2H), 2.91-2.92 (m, 2H), 4.00 (s, 3H), 6.98 (d,  $J = 0.9$  Hz, 1H), 7.12 (d,  $J = 0.9$  Hz, 1H);  $^{13}\text{C}$  NMR (75 MHz,  $\text{CDCl}_3$ )  $\delta$  20.2, 23.9, 36.1, 37.7, 125.9, 129.1, 139.7, 171.0; **IR** (ATR) 2931, 1651, 1404, 1273, 1191, 1132, 895, 823, 776, 675  $\text{cm}^{-1}$ ; **HRMS** (ESI) calculated for  $\text{C}_{11}\text{H}_{15}\text{N}_3\text{NaO}^+$   $[\text{M}+\text{Na}]^+$  228.1113. found 228.1116.

**(7-Azabicyclo[4.1.0]heptan-7-yl)(1-Ethyl-1*H*-imidazol-2-yl)methanone (1c);**

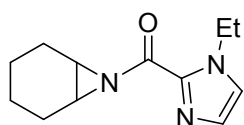

**m.p.** 52.0-53.0  $^{\circ}\text{C}$ ;  $^1\text{H}$  NMR (300 MHz,  $\text{CDCl}_3$ )  $\delta$  1.26-1.33 (m, 2H), 1.34-1.44 (m, 3H), 1.48-1.59 (m, 2H), 1.87-1.95 (m, 2H), 2.15-2.25 (m, 2H), 2.91-2.92 (m, 2H), 4.45 (q,  $J = 7.2$  Hz, 2H), 7.05 (d,  $J = 0.9$  Hz, 1H), 7.13 (d,  $J = 0.9$  Hz, 1H);  $^{13}\text{C}$  NMR (75 MHz,  $\text{CDCl}_3$ )  $\delta$  16.7, 20.2, 37.7, 43.6, 124.1, 129.3, 139.0, 170.8; **IR** (ATR) 2922, 1661, 1407, 1268, 1136, 894, 784, 670  $\text{cm}^{-1}$ ; **HRMS** (ESI) calculated for

$C_{12}H_{17}N_3NaO^+$   $[M+Na]^+$  242.1269. found 242.1269.

**(1-Benzyl-1*H*-imidazol-2-yl)(7-azabicyclo[4.1.0]heptan-7-yl)methanone (1d);**

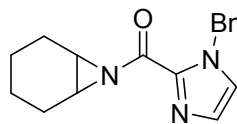

**m.p.** 52.5-53.0 °C;  $^1H$  NMR (300 MHz,  $CDCl_3$ )  $\delta$  1.27-1.36 (m, 2H), 1.47-1.55 (m, 2H), 1.85-1.93 (m, 2H), 2.14-2.88 (m, 2H), 2.88-2.89 (m, 2H), 5.64 (s, 2H), 7.02 (s, 1H), 7.15 (s, 1H), 7.18-7.20 (m, 2H), 7.24-7.34 (m, 3H);  $^{13}C$  NMR (75 MHz,  $CDCl_3$ )  $\delta$  20.1, 23.9, 37.8, 51.6, 124.9, 127.7, 128.0, 128.9, 129.5, 136.9, 139.3, 170.9; **IR** (ATR) 2937, 1739, 1658, 1410, 1272, 1200, 1121, 894, 770, 723  $cm^{-1}$ ; **HRMS** (ESI) calculated for  $C_{17}H_{19}N_3NaO^+$   $[M+Na]^+$  304.1426. found 304.1415.

**(7-azabicyclo[4.1.0]hept-3-en-7-yl)(1-methyl-1*H*-imidazol-2-yl)methanone (1e);**

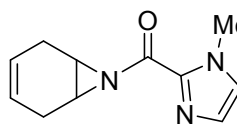

**m.p.** 96.4-97.2 °C;  $^1H$  NMR (300 MHz,  $CDCl_3$ )  $\delta$  2.44-2.50 (m, 2H), 2.81-2.87 (m, 2H), 3.07 (s, 2H), 3.99 (s, 3H), 5.51 (s, 2H), 6.98 (d,  $J$  = 0.6 Hz, 1H), 7.11 (d,  $J$  = 0.6 Hz, 1H);  $^{13}C$  NMR (75 MHz,  $CDCl_3$ )  $\delta$  24.0, 35.9, 36.8, 122.4, 125.8, 128.9, 139.6, 170.2; **IR** (ATR) 3722, 2306, 1658, 1407, 1281, 1140, 1044, 1002, 900, 876, 779, 684  $cm^{-1}$ ; **HRMS** (ESI) calculated for  $C_{11}H_{13}N_3NaO^+$   $[M+Na]^+$  226.0956. found 226.0953.

**(1-Methyl-1*H*-imidazol-2-yl)(1a,2,7,7a-tetrahydro-1*H*-naphtho[2,3-*b*]azirin-1-yl)methanone (1f);**

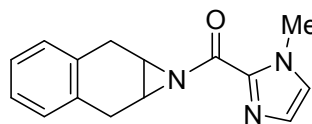

**m.p.** 154.5-155.5 °C;  $^1H$  NMR (300 MHz,  $CDCl_3$ )  $\delta$  3.16-3.21 (m, 2H), 3.33 (s, 2H), 3.49-3.55 (m, 2H), 3.70 (s, 3H), 6.89 (s, 1H), 6.98-7.01 (m, 2H), 7.07-7.11 (m, 3H);  $^{13}C$  NMR (75 MHz,  $CDCl_3$ )  $\delta$  29.3, 35.6, 37.6, 125.5, 126.7, 128.7, 129.3, 132.6, 139.6, 169.2; **IR** (ATR) 3022, 2922, 1758, 1657, 1416, 1277, 1140, 887, 761, 666  $cm^{-1}$ ; **HRMS** (ESI) calculated for  $C_{15}H_{15}N_3NaO^+$   $[M+Na]^+$  276.1113. found 276.1114.

**(6-Azabicyclo[3.1.0]hexan-6-yl)(1-methyl-1*H*-imidazol-2-yl)methanone (1g);**

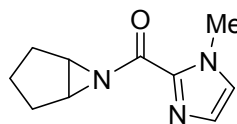

**m.p.** 61.0-62.0 °C;  $^1H$  NMR (300 MHz,  $CDCl_3$ )  $\delta$  1.21-1.29 (m, 1H), 1.60-1.78 (m, 3H), 2.21-2.28 (m, 2H), 3.35 (s, 2H), 4.01 (s, 3H), 6.98 (s, 1H), 7.13 (s, 1H);  $^{13}C$  NMR (75 MHz,  $CDCl_3$ )  $\delta$  19.4, 27.0, 36.1, 44.1, 125.8, 128.9, 139.6, 168.8; **IR** (ATR) 2968, 1739, 1652, 1408, 1269, 1228, 1133, 915, 811, 668  $cm^{-1}$ ; **HRMS** (ESI) calculated for  $C_{10}H_{13}N_3NaO^+$   $[M+Na]^+$  214.0956. found 214.0961.

**(2,3-Dimethylaziridin-1-yl)(1-methyl-1*H*-imidazol-2-yl)methanone (1h);**

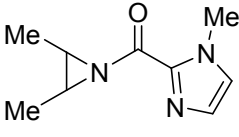 **m.p.** 80.0-61.0 °C; **<sup>1</sup>H NMR** (300 MHz, CDCl<sub>3</sub>) δ 1.41 (d, *J* = 5.4 Hz, 6H), 2.75-2.79 (m, 1H), 4.00 (s, 3H), 6.99 (s, 1H), 7.12 (s, 1H); **<sup>13</sup>C NMR** (75 MHz, CDCl<sub>3</sub>) δ 12.9, 36.0, 38.1, 126.0, 129.1, 139.6, 171.2; **IR** (ATR) 3129, 3114, 2958, 1656, 1453, 1416, 1453, 1416, 1312, 1283, 1164, 903, 788, 670 cm<sup>-1</sup>; **HRMS** (ESI) calculated for C<sub>9</sub>H<sub>13</sub>N<sub>3</sub>NaO<sup>+</sup> [M+Na]<sup>+</sup> 202.0956. found 202.0961.

**(2,3-Diethylaziridin-1-yl)(1-methyl-1*H*-imidazol-2-yl)methanone (1i);**

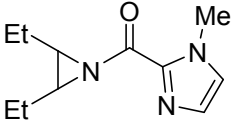 **m.p.** 71.5-72.5 °C; **<sup>1</sup>H NMR** (300 MHz, CDCl<sub>3</sub>) δ 1.11 (t, *J* = 7.5 Hz, 6H), 1.54-1.63 (m, 2H), 1.90-1.99 (m, 2H), 2.63-2.66 (m, 2H), 4.00 (s, 3H), 6.99 (d, *J* = 0.9 Hz, 1H), 7.11 (d, *J* = 0.9 Hz, 1H); **<sup>13</sup>C NMR** (75 MHz, CDCl<sub>3</sub>) δ 11.6, 21.0, 35.9, 44.3, 125.9, 128.9, 139.5, 171.1; **IR** (ATR) 2961, 1658, 1407, 1284, 1144, 1011, 907, 788, 663 cm<sup>-1</sup>; **HRMS** (ESI) calculated for C<sub>11</sub>H<sub>17</sub>N<sub>3</sub>NaO<sup>+</sup> [M+Na]<sup>+</sup> 230.1269. found 230.1273.

**(2,3-Dipropylaziridin-1-yl)(1-methyl-1*H*-imidazol-2-yl)methanone (1j);**

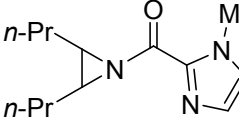 **m.p.** 80.5-81.5 °C; **<sup>1</sup>H NMR** (300 MHz, CDCl<sub>3</sub>) δ 0.96-1.03 (m, 6H), 1.50-1.62 (m, 6H), 1.83-1.88 (m, 2H), 2.67-2.69 (m, 2H), 3.99 (s, 3H), 6.99 (s, 1H), 7.12 (s, 1H); **<sup>13</sup>C NMR** (75 MHz, CDCl<sub>3</sub>) δ 14.1, 20.7, 29.9, 36.0, 42.9, 126.0, 129.0, 139.6, 171.3; **IR** (ATR) 2953, 1657, 1410, 1285, 1153, 914, 794, 663 cm<sup>-1</sup>; **HRMS** (ESI) calculated for C<sub>13</sub>H<sub>21</sub>N<sub>3</sub>NaO<sup>+</sup> [M+Na]<sup>+</sup> 258.1582. found 258.1587.

**General procedure for the enantioselective desymmetrization of aziridines with malononitrile:**

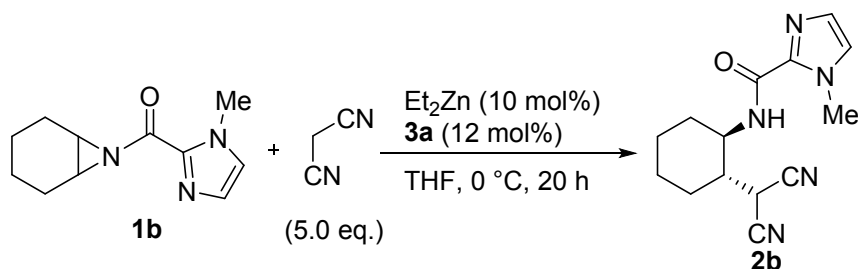

Ligand **3a** (4.8 mg, 0.012 mmol) and Et<sub>2</sub>Zn (1.11M solution in toluene, 9.0 μL, 0.01 mmol) was dissolved in THF (0.5 mL) and stirred at room temperature for 30 min. Aziridine **1b** (20.5 mg, 0.1 mmol) was added to a solution and cooled to 0 °C, then malononitrile (33.1 mg, 0.5 mmol) was added. After stirring for 20 h, the reaction mixture was diluted with AcOEt and filtered through the celite pad, and the volatile compounds were removed under reduced pressure. The crude product was purified by silica gel column chromatography (Hexane/AcOEt=50/50) to give (1*R*,2*S*)-**2b** in 89% yield 97% ee) as a white solid. (1*S*,2*R*)-**2b** can be synthesised by using ligand **3b** instead of **3a** in 74% yield 94% ee).

***N*-((1*R*,2*S*)-2-(Dicyanomethyl)cyclohexyl)picolinamide (2a);**

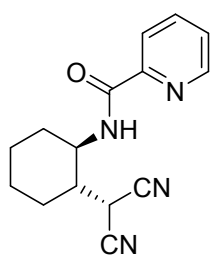

[α]<sub>D</sub><sup>25</sup> −33.2 (*c* 0.59, CHCl<sub>3</sub>, 88% ee); **m.p.** 109.0-111.0 °C; **<sup>1</sup>H NMR** (300 MHz, CDCl<sub>3</sub>) δ 1.35-1.72 (m, 4H), 1.89-1.97 (m, 2H), 2.06-2.16 (m, 2H), 2.23-2.27 (m, 1H), 3.92-4.04 (m, 1H), 4.09-4.10 (m, 1H); **<sup>13</sup>C NMR** (75 MHz, CDCl<sub>3</sub>) δ 24.7, 24.8, 26.6, 28.3, 33.0, 45.9, 50.1, 111.4, 113.0, 122.7, 126.9, 137.8, 148.2, 149.0, 164.9; **IR** (ATR) 3339, 2925, 2362, 1737, 1655, 1520, 1365, 1217, 729 cm<sup>−1</sup>; **HRMS** (ESI) calculated for C<sub>15</sub>H<sub>16</sub>N<sub>4</sub>NaO<sup>+</sup> [M+Na]<sup>+</sup> 291.1222. found 291.1230; **HPLC** (DAICEL CHIRALPAK IC-3, Hexane:*i*PrOH = 70:30, 1.0 mL/min, 215 nm) *t*<sub>(1*S*,2*R*)</sub> = 15.6, *t*<sub>(1*R*,2*S*)</sub> = 20.2 min.

***N*-(2-(Dicyanomethyl)cyclohexyl)-1-methyl-1*H*-imidazole-2-carboxamide (2b);**

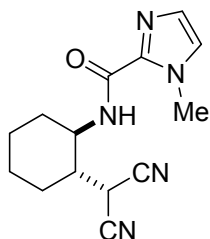

(1*S*,2*R*)-**2b**: [α]<sub>D</sub><sup>25</sup> −13.6 (*c* 0.72, CHCl<sub>3</sub>, 97% ee); (1*R*,2*S*)-**2b**: [α]<sub>D</sub><sup>25</sup> +34.5 (*c* 0.59, CHCl<sub>3</sub>, 94% ee); **m.p.** 151.0-152.0 °C; **<sup>1</sup>H NMR** (300 MHz, CDCl<sub>3</sub>) δ 1.29-1.52 (m, 3H), 1.54-1.68 (m, 1H), 1.87-1.94 (m, 2H), 1.98-2.12 (m, 2H), 2.21-2.25 (m, 1H), 3.84-3.96 (m, 1H), 4.06 (s, 3H), 4.11 (d, *J* = 3.3 Hz, 1H), 7.01 (s, 2H), 7.21 (s, 1H); **<sup>13</sup>C NMR** (75 MHz, CDCl<sub>3</sub>) δ 24.6, 24.8, 26.4, 28.1, 33.0, 35.8, 45.5, 49.5, 111.5, 112.9, 126.1, 127.8, 138.4, 159.5; **IR** (ATR) 3288, 2925, 2360, 1650, 1550, 1270, 1155, 825, 748, 658 cm<sup>−1</sup>; **HRMS** (ESI) calculated for C<sub>14</sub>H<sub>17</sub>N<sub>5</sub>NaO<sup>+</sup> [M+Na]<sup>+</sup> 294.1331. found 294.1330; **HPLC** (DAICEL CHIRALPAK ID-3,

Hexane:*i*PrOH = 80:20, 1.0 mL/min, 215 nm)  $t_{(1S,2R)} = 12.9$ ,  $t_{(1R,2S)} = 20.0$  min.

***N*-((1*R*,2*S*)-2-(Dicyanomethyl)cyclohexyl)-1-ethyl-1*H*-imidazole-2-carboxamide (2c);**

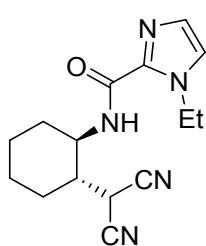

$[\alpha]_D^{25} -24.2$  (*c* 0.81, CHCl<sub>3</sub>, 95% ee); <sup>1</sup>H NMR (300 MHz, CDCl<sub>3</sub>)  $\delta$  1.31-1.54 (m, 6H), 1.57-1.67 (m, 1H), 1.87-1.94 (m, 2H), 1.99-2.11 (m, 2H), 2.20-2.25 (m, 1H), 3.84-3.94 (m, 1H), 4.11 (d, *J* = 3.6 Hz, 1H), 4.44-4.61 (m, 2H), 7.01 (s, 1H), 7.07 (s, 1H), 7.35 (d, *J* = 9.0 Hz, 1H); <sup>13</sup>C NMR (75 MHz, CDCl<sub>3</sub>)  $\delta$  16.7, 24.7, 24.8, 26.5, 28.2, 33.1, 43.5, 45.7, 49.6, 111.4, 112.9, 124.3, 128.0, 137.7, 159.3; IR (ATR) 3366, 2936, 2360, 1662, 1534, 1497, 1263, 1155, 765 cm<sup>-1</sup>;

**HRMS** (ESI) calculated for C<sub>15</sub>H<sub>19</sub>N<sub>5</sub>NaO<sup>+</sup> [M+Na]<sup>+</sup> 308.1487. found 308.1493; **HPLC** (DAICEL CHIRALPAK IG, Hexane:*i*PrOH = 90:10, 1.0 mL/min, 215 nm)  $t_{(1S,2R)} = 17.7$ ,  $t_{(1R,2S)} = 20.5$  min.

**1-Benzyl-*N*-((1*R*,2*S*)-2-(dicyanomethyl)cyclohexyl)-1*H*-imidazole-2-carboxamide (2d);**

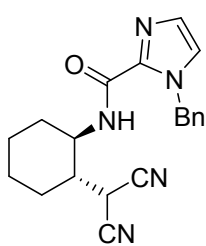

$[\alpha]_D^{25} -23.6$  (*c* 0.85, CHCl<sub>3</sub>, 96% ee); **m.p.** 135.0-136.0 °C; <sup>1</sup>H NMR (300 MHz, CDCl<sub>3</sub>)  $\delta$  1.26-1.45 (m, 3H), 1.51-1.60 (m, 1H), 1.86-2.02 (m, 3H), 2.05-2.07 (m, 1H), 2.18-2.22 (m, 1H), 3.86-3.91 (m, 2H), 5.64-5.75 (m, 2H), 7.03 (s, 1H), 7.04 (s, 1H), 7.21-7.24 (m, 2H), 7.28-7.39 (m, 4H); <sup>13</sup>C NMR (75 MHz, CDCl<sub>3</sub>)  $\delta$  24.7, 24.8, 26.3, 28.1, 32.9, 45.8, 49.5, 51.6, 111.4, 112.9, 125.1, 127.9, 128.2, 128.3, 129.0, 136.6, 138.1, 159.4; IR (ATR) 3726, 3702, 3624,

3603, 2364, 2341, 2309, 1655, 1529, 1496, 1464, 784, 731, 669 cm<sup>-1</sup>; **HRMS** (ESI) calculated for C<sub>20</sub>H<sub>21</sub>N<sub>5</sub>NaO<sup>+</sup> [M+Na]<sup>+</sup> 370.1644. found 370.1653; **HPLC** (DAICEL CHIRALPAK IC-3, Hexane:*i*PrOH = 90:10, 1.0 mL/min, 215 nm)  $t_{(1S,2R)} = 17.4$ ,  $t_{(1R,2S)} = 20.1$  min.

***N*-((1*R*,6*S*)-6-(Dicyanomethyl)cyclohex-3-en-1-yl)-1-methyl-1*H*-imidazole-2-carboxamide (2e);**

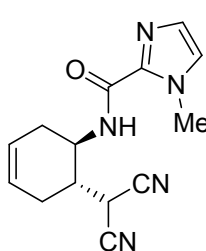

$[\alpha]_D^{25} -40.6$  (*c* 0.58, CHCl<sub>3</sub>, 94% ee); <sup>1</sup>H NMR (300 MHz, CDCl<sub>3</sub>)  $\delta$  2.29-2.67 (m, 5H), 4.06 (s, 3H), 4.14 (d, *J* = 4.5 Hz, 1H), 4.19-4.24 (m, 1H), 5.73 (s, 2H), 7.01 (s, 2H), 7.41 (d, *J* = 8.7 Hz, 1H); <sup>13</sup>C NMR (75 MHz, CDCl<sub>3</sub>)  $\delta$  25.8, 28.1, 31.6, 35.9, 40.7, 46.8, 111.4, 112.5, 124.2, 125.0, 126.3, 127.9, 138.3, 159.5; IR (ATR) 3726, 3381, 3033, 2844, 1721, 1659, 1536, 1498, 1473, 1269, 1154, 734, 679 cm<sup>-1</sup>; **HRMS** (ESI) calculated for C<sub>14</sub>H<sub>15</sub>N<sub>5</sub>NaO<sup>+</sup> [M+Na]<sup>+</sup> 292.1174.

found 292.1174; **HPLC** (DAICEL CHIRALPAK ID-3, Hexane:*i*PrOH = 80:20, 1.0 mL/min, 209 nm)  $t_{(1S,6R)} = 17.2$ ,  $t_{(1R,6S)} = 20.6$  min.

***N*-((2*R*,3*S*)-3-(Dicyanomethyl)-1,2,3,4-tetrahydronaphthalen-2-yl)-1-methyl-1*H*-imidazole-2-carboxamide (2f);**

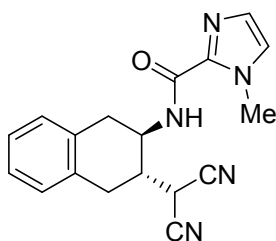

**[ $\alpha$ ]<sub>D</sub><sup>25</sup>** −33.1 (*c* 0.27, CHCl<sub>3</sub>, 73% ee); **<sup>1</sup>H NMR** (300 MHz, CDCl<sub>3</sub>)  $\delta$  2.64-2.71 (m, 1H), 2.98-3.37 (m, 4H), 4.07 (s, 3H), 4.33 (d, *J* = 4.8 Hz, 1H), 4.37-4.40 (m, 1H), 7.02 (s, 2H), 7.11-7.12 (m, 1H), 7.20-7.26 (m, 3H), 7.49 (d, *J* = 8.4 Hz, 1H); **<sup>13</sup>C NMR** (75 MHz, CDCl<sub>3</sub>)  $\delta$  26.2, 31.8, 35.3, 35.9, 42.0, 47.8, 111.3, 112.5, 126.3, 127.2, 128.0, 128.8, 132.4, 133.0, 138.3, 159.7; **IR** (ATR) 3362, 2929, 2359, 2254, 1665, 1536, 1496, 1474, 1154, 909, 730 cm<sup>−1</sup>; **HRMS** (ESI) calculated for C<sub>18</sub>H<sub>17</sub>N<sub>5</sub>NaO<sup>+</sup> [*M*+Na]<sup>+</sup> 342.1331. found 342.1318; **HPLC** (DAICEL CHIRALPAK IC-3, Hexane:*i*PrOH = 90:10, 1.0 mL/min, 209 nm) *t*<sub>(2*S*,3*R*)</sub> = 26.8, *t*<sub>(2*R*,3*S*)</sub> = 30.0 min.

***N*-((1*R*,2*S*)-2-(Dicyanomethyl)cyclopentyl)-1-methyl-1*H*-imidazole-2-carboxamide (2g);**

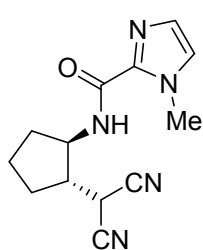

**[ $\alpha$ ]<sub>D</sub><sup>25</sup>** −13.3 (*c* 0.47, CHCl<sub>3</sub>, 95% ee); **m.p.** 99.0-100.0 °C; **<sup>1</sup>H NMR** (300 MHz, CDCl<sub>3</sub>)  $\delta$  1.69-1.92 (m, 4H), 2.17-2.25 (m, 2H), 2.38-2.42 (m, 1H), 4.02 (s, 3H), 4.15-4.20 (m, 1H), 4.63 (d, *J* = 4.2 Hz, 1H), 6.98 (s, 1H), 6.98 (s, 1H), 7.47 (br, 1H); **<sup>13</sup>C NMR** (75 MHz, CDCl<sub>3</sub>)  $\delta$  22.8, 26.5, 28.5, 32.4, 35.7, 48.2, 54.0, 112.2, 112.9, 126.0, 127.9, 138.3, 160.1; **IR** (ATR) 3390, 2969, 2360, 1735, 1655, 1506, 1281, 1091, 912, 731 cm<sup>−1</sup>; **HRMS** (ESI) calculated for C<sub>13</sub>H<sub>15</sub>N<sub>5</sub>NaO<sup>+</sup> [*M*+Na]<sup>+</sup> 280.1174. found 280.1173; **HPLC** (DAICEL CHIRALPAK IC-3, Hexane:*i*PrOH = 80:20, 1.0 mL/min, 215 nm) *t*<sub>(1*S*,2*R*)</sub> = 14.5, *t*<sub>(1*R*,2*S*)</sub> = 16.5 min.

**(4*S*,5*R*)-2-amino-4,5-dimethyl-1-(1-methyl-1*H*-imidazole-2-carbonyl)-4,5-dihydro-1*H*-pyrrole-3-carbonitrile (2h);**

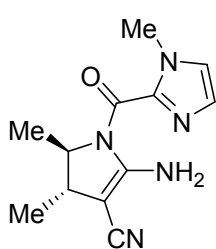

**[ $\alpha$ ]<sub>D</sub><sup>25</sup>** +56.0 (*c* 0.51, CHCl<sub>3</sub>, 90% ee); **m.p.** 126.5-127.5 °C; **<sup>1</sup>H NMR** (300 MHz, CDCl<sub>3</sub>)  $\delta$  1.17-1.22 (m, 6H), 2.48-2.52 (m, 1H), 3.93 (s, 3H), 5.21 (br, 1H), 6.39 (br, 2H), 7.02 (s, 1H), 7.11 (s, 1H); **<sup>13</sup>C NMR** (75 MHz, CDCl<sub>3</sub>)  $\delta$  20.8, 21.7, 36.3, 40.9, 64.4, 66.4, 119.6, 125.9, 128.3, 138.7, 156.3, 160.3; **IR** (ATR) 3400, 2962, 2179, 1644, 1551, 1404, 1167, 987, 780, 658 cm<sup>−1</sup>; **HRMS** (ESI) calculated for C<sub>12</sub>H<sub>15</sub>N<sub>5</sub>NaO<sup>+</sup> [*M*+Na]<sup>+</sup> 268.1174. found 268.1174; **HPLC** (DAICEL CHIRALPAK IC-3, Hexane:*i*PrOH = 80:20, 1.0 mL/min, 215 nm) *t*<sub>(4*R*,5*S*)</sub> = 17.8, *t*<sub>(4*S*,5*R*)</sub> = 22.6 min.

**(4*S*,5*R*)-2-amino-4,5-diethyl-1-(1-methyl-1*H*-imidazole-2-carbonyl)-4,5-dihydro-1*H*-pyrrole-3-carbonitrile (2i);**

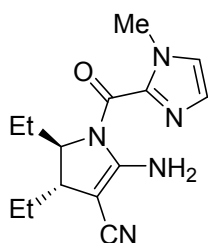

**[ $\alpha$ ]<sub>D</sub><sup>25</sup> +46.7** (*c* 0.63, CHCl<sub>3</sub>, 94% ee); **<sup>1</sup>H NMR** (300 MHz, CDCl<sub>3</sub>)  $\delta$  0.83 (t, *J* = 7.2 Hz, 3H), 1.00 (t, *J* = 7.2 Hz, 3H), 1.47-1.67 (m, 4H), 2.45-2.49 (m, 1H), 3.92 (s, 3H), 5.25 (br, 1H), 6.41 (br, 2H), 7.00 (s, 1H), 7.10 (s, 1H); **<sup>13</sup>C NMR** (75 MHz, CDCl<sub>3</sub>)  $\delta$  8.9, 10.7, 28.5, 36.2, 44.4, 64.7, 66.8, 120.0, 125.8, 128.3, 138.8, 157.4, 160.3; **IR** (ATR) 3726, 3700, 2970, 2366, 1468, 1434, 1376, 1334, 1158, 806, 754 cm<sup>-1</sup>; **HRMS** (ESI) calculated for C<sub>14</sub>H<sub>19</sub>N<sub>5</sub>NaO<sup>+</sup> [*M*+Na]<sup>+</sup> 396.1487. found 296.1491; **HPLC** (DAICEL CHIRALPAK ID-3, Hexane:*i*PrOH = 90:10, 1.0 mL/min, 215 nm) *t*<sub>(4*S*,5*R*)</sub> = 22.2, *t*<sub>(4*R*,5*S*)</sub> = 25.1 min.

**(4*S*,5*R*)-2-amino-1-(1-methyl-1*H*-imidazole-2-carbonyl)-4,5-dipropyl-4,5-dihydro-1*H*-pyrrole-3-carbonitrile (2j);**

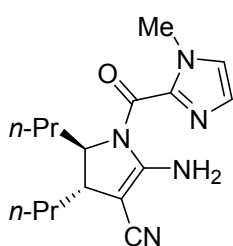

**[ $\alpha$ ]<sub>D</sub><sup>25</sup> +15.9** (*c* 0.63, CHCl<sub>3</sub>, 94% ee); **m.p.** 119.0-120.0 °C; **<sup>1</sup>H NMR** (300 MHz, CDCl<sub>3</sub>)  $\delta$  0.82 (t, *J* = 6.6 Hz, 3H), 0.90-1.00 (m, 3H), 1.25-1.27 (m, 3H), 1.37-1.62 (m, 5H), 2.49-2.53 (m, 1H), 3.92 (s, 3H), 5.34 (br, 1H), 6.42 (br, 2H), 7.01 (d, *J* = 0.6 Hz, 1H), 7.10 (d, *J* = 0.6 Hz, 1H); **<sup>13</sup>C NMR** (75 MHz, CDCl<sub>3</sub>)  $\delta$  14.0, 14.2, 17.8, 19.6, 36.1, 37.6, 38.1, 43.2, 64.8, 66.1, 120.1, 125.7, 128.2, 138.8, 157.3, 160.4; **IR** (ATR) 3400, 2959, 2178, 1655, 1650, 1557, 1411, 1143, 771 cm<sup>-1</sup>; **HRMS** (ESI) calculated for C<sub>16</sub>H<sub>23</sub>N<sub>5</sub>NaO<sup>+</sup> [*M*+Na]<sup>+</sup> 324.1800. found 324.1797; **HPLC** (DAICEL CHIRALPAK IC-3, Hexane:*i*PrOH = 90:10, 1.0 mL/min, 215 nm) *t*<sub>(4*R*,5*S*)</sub> = 28.4, *t*<sub>(4*S*,5*R*)</sub> = 36.1 min.

### Transformation of **2b** to various optically active compounds:

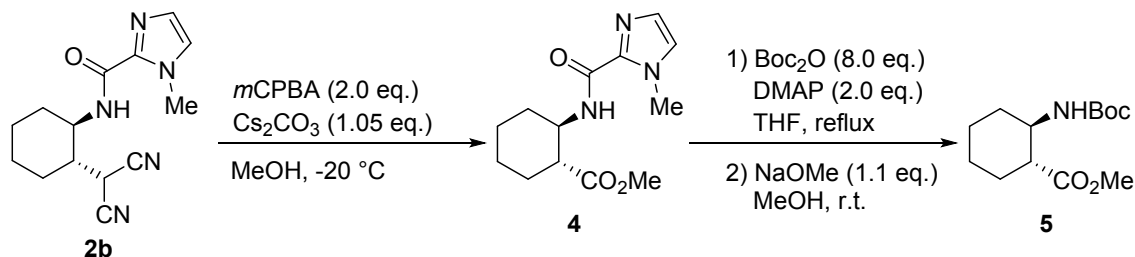

A solution of **2b** (97% ee, 85.7 mg, 0.32 mmol) in MeOH (6.3 mL) was cooled to  $-20\text{ }^{\circ}\text{C}$  and *m*-CPBA (141 mg, 0.63 mmol) was added to the solution followed by  $\text{Cs}_2\text{CO}_3$  (116 mg, 0.33 mmol). After stirring for 30 min, the reaction mixture was diluted with  $\text{H}_2\text{O}$  and warmed to room temperature, and extracted with  $\text{CH}_2\text{Cl}_2$  three times. The combined organic layer was dried over  $\text{Na}_2\text{SO}_4$  and concentrated under reduced pressure. The residue was purified by flash column chromatography ( $\text{Et}_2\text{O}/\text{Hexane}=95/5$ ) to afford **4** in 67% yield (97% ee) as a colorless oil.

To a solution of **4** (97% ee, 21.6 mg, 0.08 mmol) and 4-dimethylaminopyridine (19.5 mg, 0.16 mmol) in THF (0.32 mL), di-*tert*-butyl dicarbonate (150  $\mu\text{L}$ , 0.64 mmol) was added and refluxed for 14 h. The reaction mixture was cooled to room temperature and diluted with  $\text{H}_2\text{O}$ , and extracted with AcOEt three times. The combined organic layer was dried over  $\text{Na}_2\text{SO}_4$  and concentrated under reduced pressure. The residue was purified by flash column chromatography ( $\text{Hexane}/\text{AcOEt}=60/40$ ) to afford *N*-Boc- $\beta$ -aminoester in 79% yield (96% ee) as a colorless solid.

*N*-Boc- $\beta$ -aminoester (96% ee, 24.6 mg, 0.067 mmol) was dissolved in MeOH (0.33 mL) and added NaOMe (4.0 mg, 0.074 mmol). After stirring for 24 h at room temperature, the reaction was quenched with HCl aq. (1.0 M, 0.6 mL), and the volatile was removed under reduced pressure. The residue was added  $\text{H}_2\text{O}$  and extracted with AcOEt three times. The combined organic layer was dried over  $\text{Na}_2\text{SO}_4$  and concentrated under reduced pressure. The crude product was purified by flash column chromatography ( $\text{Hexane}/\text{AcOEt}=80/20$ ) to afford **5** in 92% yield (96% ee) as a white solid.

#### Methyl (1*R*,2*R*)-2-(1-methyl-1*H*-imidazole-2-carboxamido)cyclohexane-1-carboxylate (**4**);

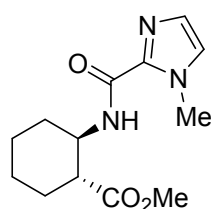

$[\alpha]_{\text{D}}^{25} -28.1$  (*c* 1.06,  $\text{CHCl}_3$ , 98% ee);  $^1\text{H NMR}$  (300 MHz,  $\text{CDCl}_3$ )  $\delta$  1.23-1.46 (m, 3H), 1.62-1.78 (m, 3H), 1.96-2.01 (m, 1H), 2.06-2.11 (m, 1H), 2.43 (dt,  $J = 3.6, 11.1$  Hz, 1H), 3.63 (s, 3H), 4.03 (s, 3H), 4.06-4.16 (m, 1H), 6.94 (s, 1H), 6.98 (s, 1H), 7.34 (d,  $J = 8.7$  Hz, 1H);  $^{13}\text{C NMR}$  (75 MHz,  $\text{CDCl}_3$ )  $\delta$  24.5, 24.6, 28.7, 32.6, 35.7, 49.3, 49.5, 51.9, 125.5, 127.5, 139.0, 158.5, 174.4;

**IR** (ATR) 3377, 2933, 1733, 1662, 1540, 1266, 1173, 1020, 733  $\text{cm}^{-1}$ ; **HRMS** (ESI) calculated for  $\text{C}_{13}\text{H}_{19}\text{N}_3\text{NaO}_3^+$   $[\text{M}+\text{Na}]^+$  288.1324. found 288.1337; **HPLC** (DAICEL CHIRALPAK IC-3, Hexane:*i*PrOH = 70:30, 1.0 mL/min, 215 nm)  $t_{(1R,2R)} = 10.6$ ,  $t_{(1S,2S)} = 17.3$  min.

**Methyl (1*R*,2*R*)-2-(*N*-(*tert*-butoxycarbonyl)-1-methyl-1*H*-imidazole-2-carboxamido)**

**Cyclohexane-1-carboxylate;**

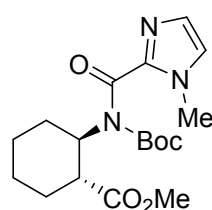

$[\alpha]_D^{25} -23.3$  (*c* 0.95, CHCl<sub>3</sub>, 98% ee); **m.p.** 89.5-90.5 °C; <sup>1</sup>H NMR (300 MHz, CDCl<sub>3</sub>)  $\delta$  1.18-1.57 (m, 3H), 1.24 (s, 9H), 1.73-2.08 (m, 5H), 3.33 (dt, *J* = 3.6, 11.9 Hz, 1H), 3.62 (s, 3H), 3.84 (s, 3H), 4.47 (dt, *J* = 3.6, 11.9 Hz, 1H), 6.94 (s, 1H), 7.03 (s, 1H); <sup>13</sup>C NMR (75 MHz, CDCl<sub>3</sub>)  $\delta$  24.8, 25.7, 27.6, 29.2, 30.2, 34.3, 46.8, 51.8, 57.6, 82.7, 124.2, 128.3, 142.1, 153.2, 163.8, 174.8; **IR** (ATR) 2947, 1731, 1669, 1421, 1315, 1233, 1106, 768, 660 cm<sup>-1</sup>; **HRMS** (ESI) calculated for C<sub>18</sub>H<sub>27</sub>N<sub>3</sub>NaO<sub>5</sub><sup>+</sup> [M+Na]<sup>+</sup> 388.1848. found 388.1848; **HPLC** (DAICEL CHIRALPAK ID-3, Hexane:*i*PrOH = 80:20, 1.0 mL/min, 215 nm) *t*<sub>(1*R*,2*R*)</sub> = 9.8, *t*<sub>(1*S*,2*S*)</sub> = 12.7 min.

**Methyl (1*R*,2*R*)-2-((*tert*-butoxycarbonyl)amino)cyclohexane-1-carboxylate (**5**);<sup>3</sup>**

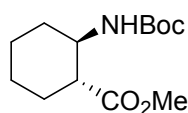

$[\alpha]_D^{25} -5.8$  (*c* 0.73, CHCl<sub>3</sub>, 96% ee); <sup>1</sup>H NMR (300 MHz, CDCl<sub>3</sub>)  $\delta$  1.12-1.26 (m, 2H), 1.31-1.48 (m, 1H), 1.42 (s, 9H), 1.54-1.74 (m, 3H), 1.89-1.93 (m, 1H), 2.01-2.06 (m, 1H), 2.23 (dt, *J* = 3.3 Hz, 11.1 Hz, 1H), 3.62-3.63 (m, 1H), 3.67 (s, 3H), 4.50 (br, 1H); <sup>13</sup>C NMR (75 MHz, CDCl<sub>3</sub>)  $\delta$  24.5, 24.9, 28.5, 28.6, 33.2, 50.4, 51.4, 51.9, 79.3, 155.1, 174.6; **HRMS** (ESI) calculated for C<sub>13</sub>H<sub>23</sub>NNaO<sub>4</sub><sup>+</sup> [M+Na]<sup>+</sup> 280.1525. found 280.1520.

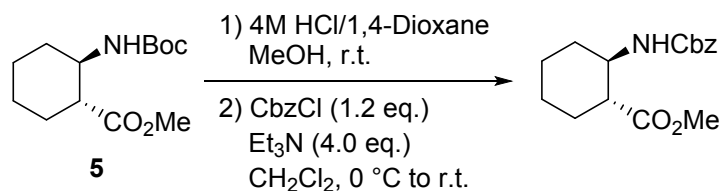

In order to determine the enantiomeric excess, we replaced the Boc group for **5** to Cbz group. **5** (96% ee, 9.0 mg, 0.035 mmol) was dissolved in MeOH (60  $\mu$ L) and added hydrogen chloride (4 M in 1,4-dioxane, 530  $\mu$ L). After stirring for 1 h at room temperature, the solution was removed under reduced pressure and the residue was suspended in CH<sub>2</sub>Cl<sub>2</sub> (0.85 mL). The solution was cooled to 0 °C and added Et<sub>3</sub>N (19.5  $\mu$ L, 0.14 mmol) followed by benzyl chloroformate (5.9  $\mu$ L, 0.042 mmol). After stirring overnight at room temperature, sat. NaHCO<sub>3</sub> aq. was added to the reaction mixture and extracted with CH<sub>2</sub>Cl<sub>2</sub> three times. The combined organic layer was dried over Na<sub>2</sub>SO<sub>4</sub> and concentrated under reduced pressure. The crude product was purified by flash column chromatography (Benzene/AcOEt=90/10) to afford *N*-Cbz- $\beta$ -aminoester in 56% yield (97% ee) as a colorless oil.

**Methyl (1*R*,2*R*)-2-(((benzyloxy)carbonyl)amino)cyclohexane-1-carboxylate;<sup>3</sup>**

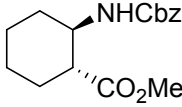  $[\alpha]_D^{25} -10.6$  (*c* 0.27, CHCl<sub>3</sub>, 97% ee); <sup>1</sup>H NMR (300 MHz, CDCl<sub>3</sub>) δ 1.16-1.25 (m, 2H), 1.32-1.41 (m, 1H), 1.58-1.76 (m, 3H), 1.89-1.96 (m, 1H), 2.05-2.08 (m, 1H), 2.23-2.30 (m, 1H), 3.62 (s, 3H), 3.68-3.76 (m, 1H), 4.71 (m, 1H), 5.07 (s, 2H), 7.29-7.38 (m, 5H); <sup>13</sup>C NMR (75 MHz, CDCl<sub>3</sub>) δ 24.4, 24.6, 28.6, 32.9, 49.8, 51.8, 66.6, 128.0, 128.5, 136.6, 155.4, 174.4; HRMS (ESI) calculated for C<sub>16</sub>H<sub>21</sub>NaNO<sub>4</sub><sup>+</sup> [M+Na]<sup>+</sup> 314.1368. found 314.1375.

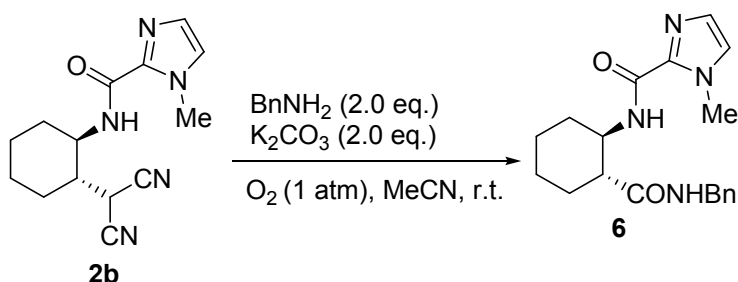

Compound **6** was synthesized by modified previous method.<sup>4</sup> To a solution of **2b** (98% ee, 27.1 mg, 0.1 mmol) and K<sub>2</sub>CO<sub>3</sub> (27.6 mg, 0.2 mmol) in CH<sub>3</sub>CN (1.0 mL), benzylamine (22.0 μL, 0.2 mmol) was added. The reaction mixture was stirred for 24 h under an oxygen atmosphere (balloon). The reaction mixture was diluted with CHCl<sub>3</sub> and filtrated through celite, and the volatile compounds were removed under reduced pressure. The crude product was purified by flash column chromatography (Hexane/AcOEt=20/80) to afford **6** in 91% yield (99% ee) as a colorless solid.

***N*-((1*R*,2*R*)-2-(Benzylcarbonyl)cyclohexyl)-1-methyl-1*H*-imidazole-2-carboxamide (**6**);**

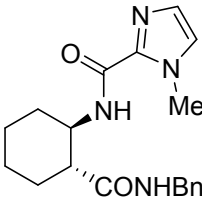  $[\alpha]_D^{25} -16.9$  (*c* 0.97, CHCl<sub>3</sub>, 99% ee); **m.p.** 222.0-223.0 °C; <sup>1</sup>H NMR (300 MHz, CDCl<sub>3</sub>) δ 1.26-1.49 (m, 3H), 1.52-1.65 (m, 1H), 1.78-1.81 (m, 2H), 2.00-2.11 (m, 2H), 2.32-2.44 (m, 2H), 3.79 (s, 3H), 4.03-4.10 (m, 1H), 4.31-4.47 (m, 2H), 6.57 (s, 1H), 6.92 (s, 1H), 6.98 (s, 1H), 7.04-7.13 (m, 5H), 7.51 (d, *J* = 9.6 Hz, 1H); <sup>13</sup>C NMR (75 MHz, CDCl<sub>3</sub>) δ 25.1, 25.2, 30.4, 33.1, 35.6, 43.4, 49.6, 52.0, 125.6, 127.1, 127.3, 127.6, 128.3, 138.5, 138.8, 158.9, 173.7; IR (ATR) 3730, 3303, 2933, 2855, 2347, 1640, 1546, 1470, 1270, 743, 656 cm<sup>-1</sup>; HRMS (ESI) calculated for C<sub>19</sub>H<sub>24</sub>N<sub>4</sub>NaO<sub>2</sub><sup>+</sup> [M+Na]<sup>+</sup> 363.1797. found 363.1800.; HPLC (DAICEL CHIRALPAK ID-3, Hexane:*i*PrOH = 70:30, 1.0 mL/min, 215 nm) *t*<sub>(1*S*,2*R*)</sub> = 46.8, *t*<sub>(1*R*,2*S*)</sub> = 53.8 min.

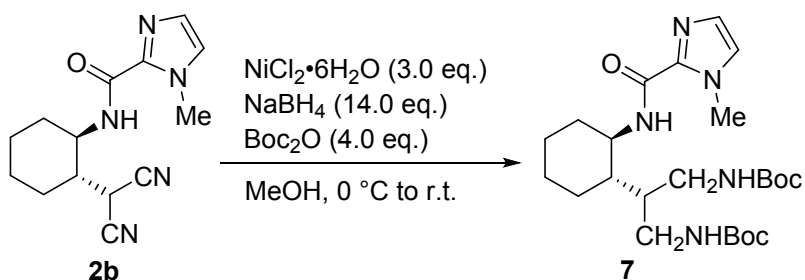

A solution of **2b** (98% ee, 27.1 mg, 0.1 mmol) in MeOH (0.7 mL) was cooled to 0 °C and added di-*tert*-butyl dicarbonate (150  $\mu$ L, 0.64 mmol) in MeOH (0.3 mL). Nickel chloride hexahydrate (71.3 mg, 0.3 mmol) was added to the reaction mixture, followed by sodium borohydride (53 mg, 1.4 mmol) was added at once. After stirring for 30 min at 0 °C, the reaction mixture was warmed to r.t. and stirred for 24 h. Diethylenetriamine (71  $\mu$ L, 0.66 mmol) was added to the reaction mixture and stirred for 1 h. The mixture was diluted with AcOEt and washed with sat. NaHCO<sub>3</sub> aq., and dried over Na<sub>2</sub>SO<sub>4</sub>. The volatile compounds were removed under reduced pressure and the residue was purified by flash column chromatography (Hexane/Acetone=80/20) to afford **7** in 59% yield (98% ee) as a colorless solid.

**Di-*tert*-Butyl (2-((1*S*,2*R*)-2-(1-methyl-1H-imidazole-2-carboxamido)cyclohexyl)propane-1,3-diyl)dicarbamate (**7**);**

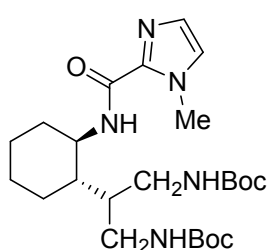

**[ $\alpha$ ]<sub>D</sub><sup>25</sup> +7.1** (*c* 0.86, CHCl<sub>3</sub>, 98% ee); **m.p.** 159.0-160.0 °C; **<sup>1</sup>H NMR** (300 MHz, CDCl<sub>3</sub>)  $\delta$  1.11-1.26 (m, 3H), 1.29-1.42 (m, 20H), 1.75-1.80 (m, 4H), 1.98-2.05 (m, 1H), 3.05-3.25 (m, 4H), 3.88-3.93 (m 1H), 4.06 (s, 3H), 5.29-5.36 (m, 2H), 6.97 (s, 1H), 6.99 (s, 1H), 7.30 (br 1H); **<sup>13</sup>C NMR** (75 MHz, CDCl<sub>3</sub>)  $\delta$  25.2, 25.4, 26.0, 28.5, 28.6, 33.7, 35.8, 39.5, 40.2, 41.9, 44.4, 49.5, 79.1, 125.7, 127.7, 159.2; **IR** (ATR) 3331, 2933, 1706, 1650, 1514, 1363, 1252, 1157, 720 cm<sup>-1</sup>; **HRMS** (ESI) calculated for C<sub>24</sub>H<sub>41</sub>N<sub>5</sub>NaO<sub>5</sub><sup>+</sup> [M+Na]<sup>+</sup> 502.3005. found 502.2996; **HPLC** (DAICEL CHIRALPAK IG, Hexane:*i*PrOH = 80:20, 1.0 mL/min, 215 nm)  $t_{(1*S*,2*R*)}$  = 16.8,  $t_{(1*R*,2*S*)}$  = 25.8 min.

### ESI-Mass spectroscopic analysis:

In order to clarify the assumed reaction mechanism, we investigated the ESI-Mass spectroscopic analysis of complex **C** (aziridine **1b** (0.1 mmol), malononitrile (5.0 equiv.), Et<sub>2</sub>Zn (10 mol %), **3a** (12 mol %) in THF (0.2 M), cation mode).

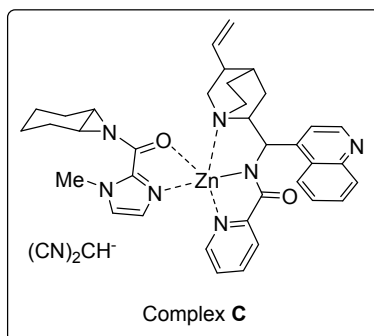

Calculated for [(complex C) - (CN)<sub>2</sub>CH]<sup>+</sup> 666.2

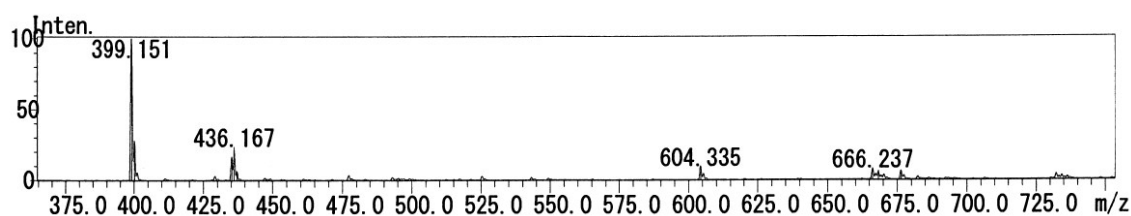

Expanding spectra for [(complex C) - (CN)<sub>2</sub>CH]<sup>+</sup>

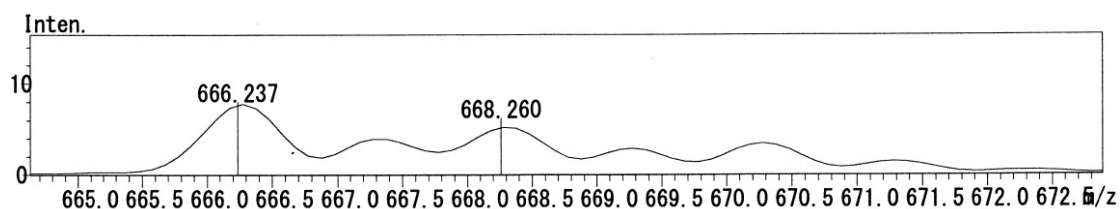

Simulated mass spectra

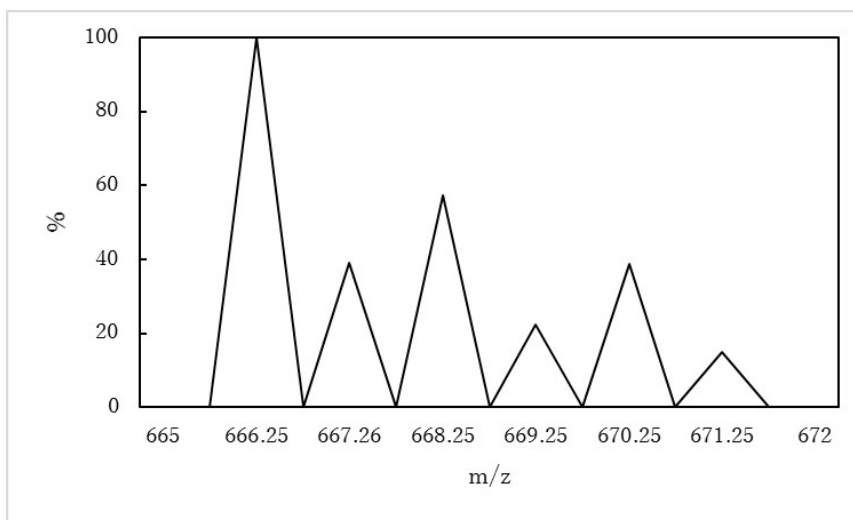

## References

- 1) E. Galeazzi, A. GuzmBn, J. L. Navaz, *J. Org. Chem.*, 1995, **60**, 1990.
- 2) B. Lassalle-Kaiser, R. Guillot, J. Sainton, M.-F. Charlot, A. Aukauloo, *Chem. Eur. J.*, 2008, **14**, 4307.
- 3) D. H. Appella, P. R. LePlae, T. L. Raguse, S. H. Gellman, *J. Org. Chem.*, 2000, **65**, 4766.
- 4) J. Li, M. J. Lear, Y. Hayashi, *Angew. Chem. Int. Ed.*, 2016, **55**, 9060.

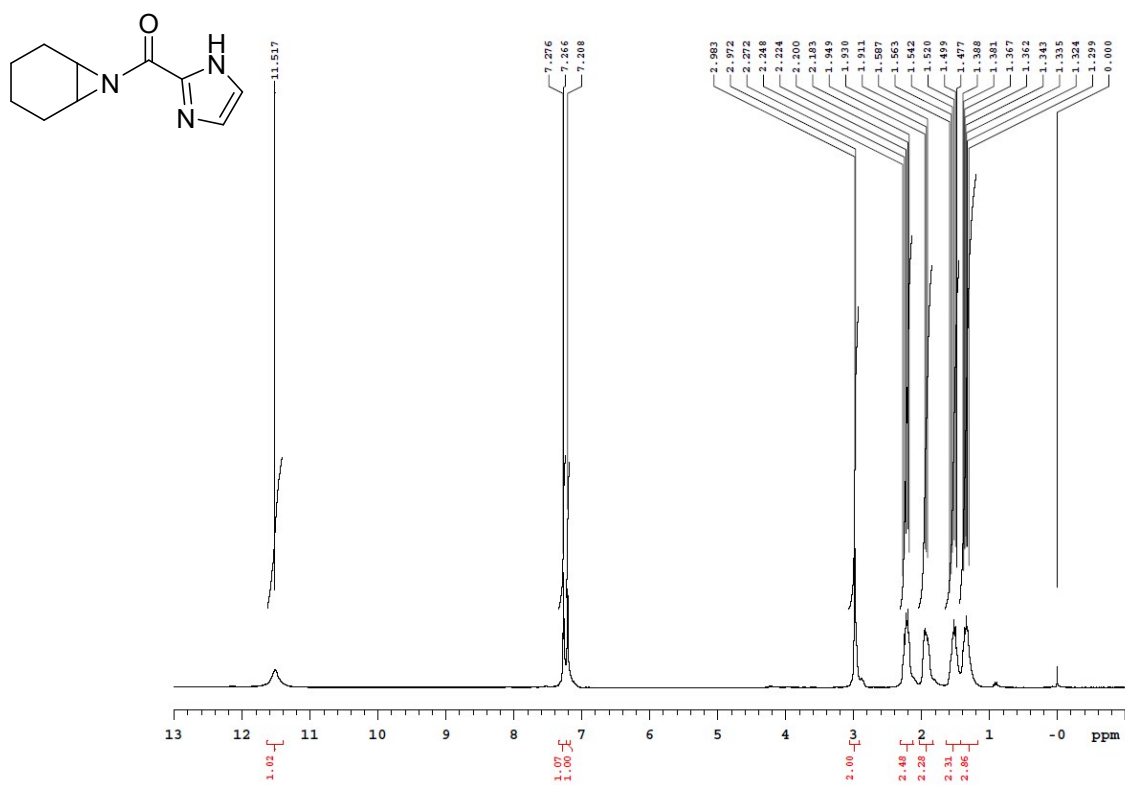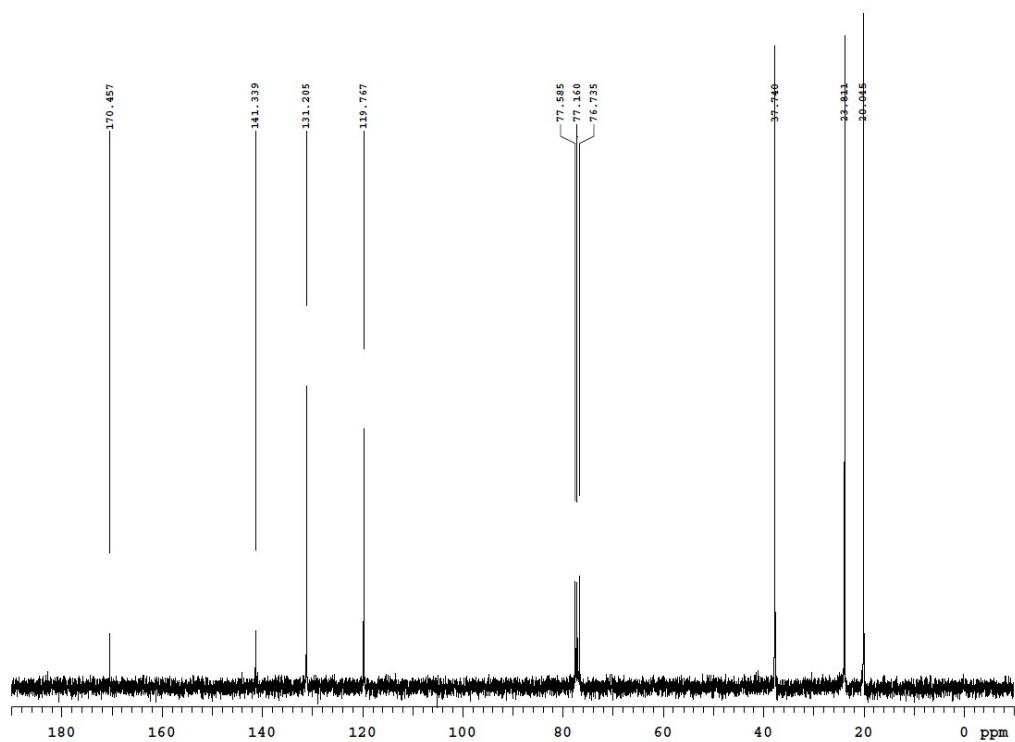

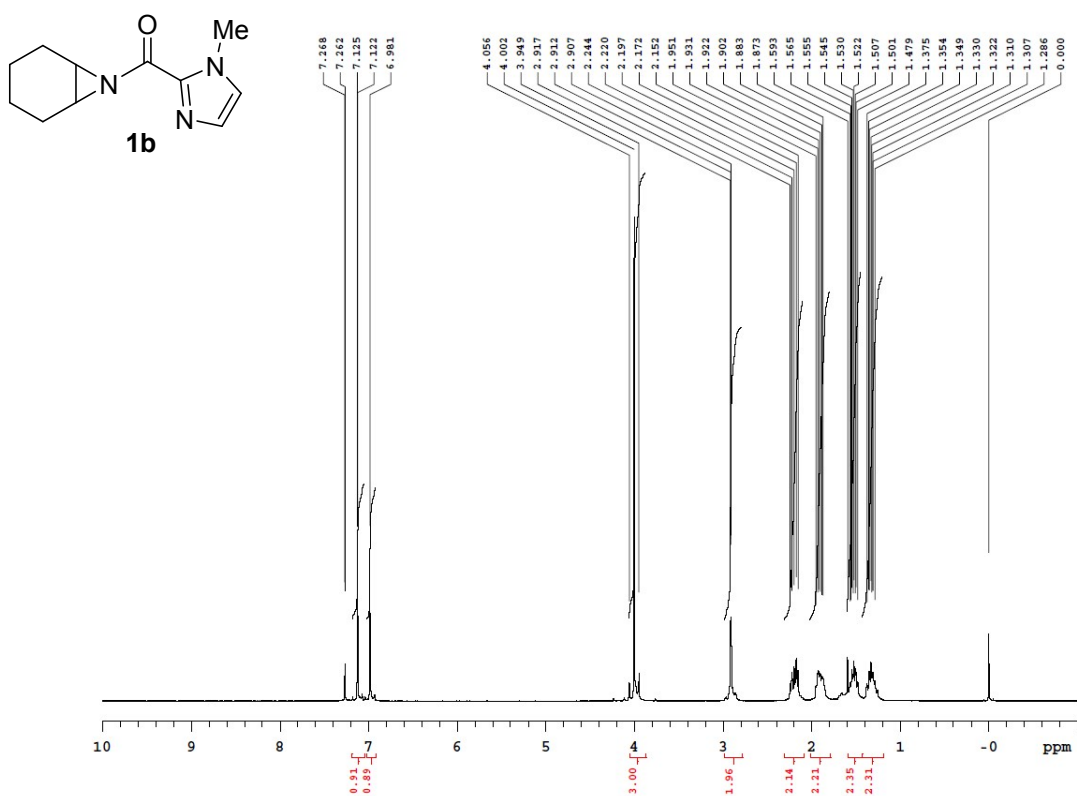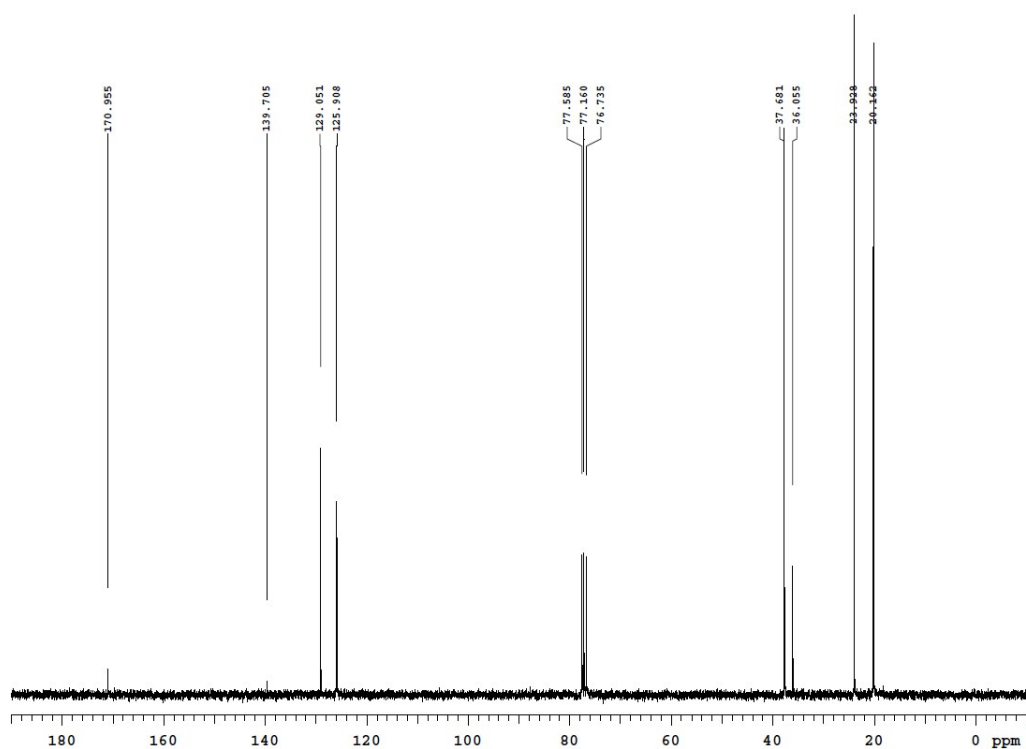

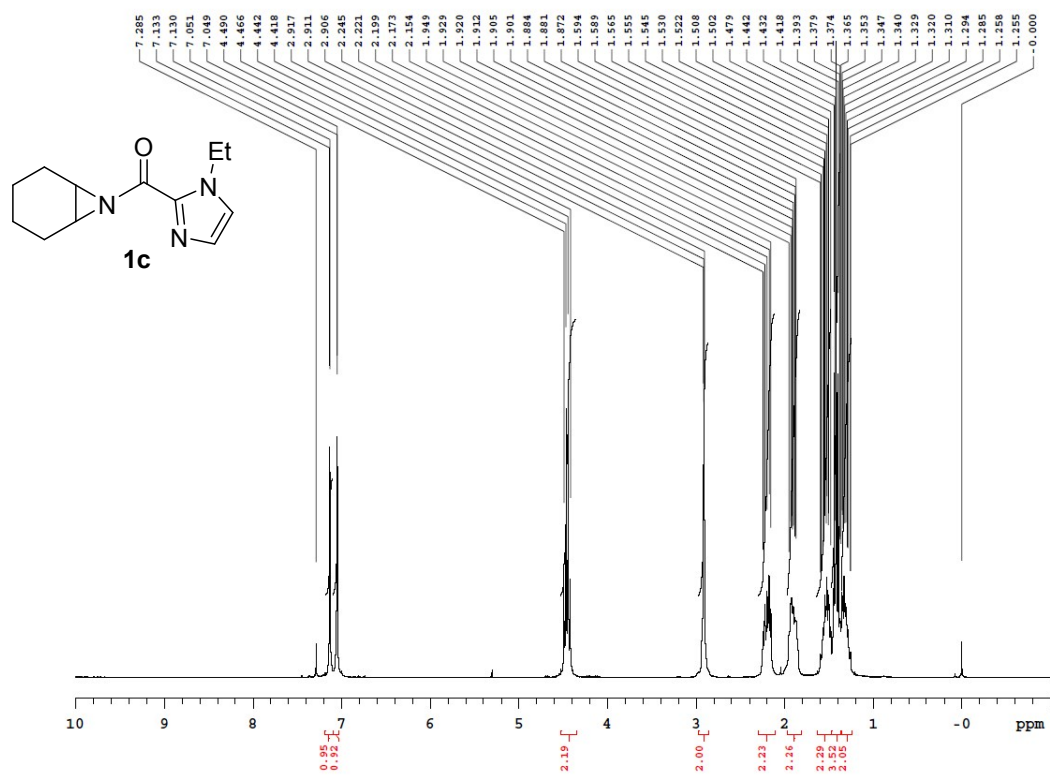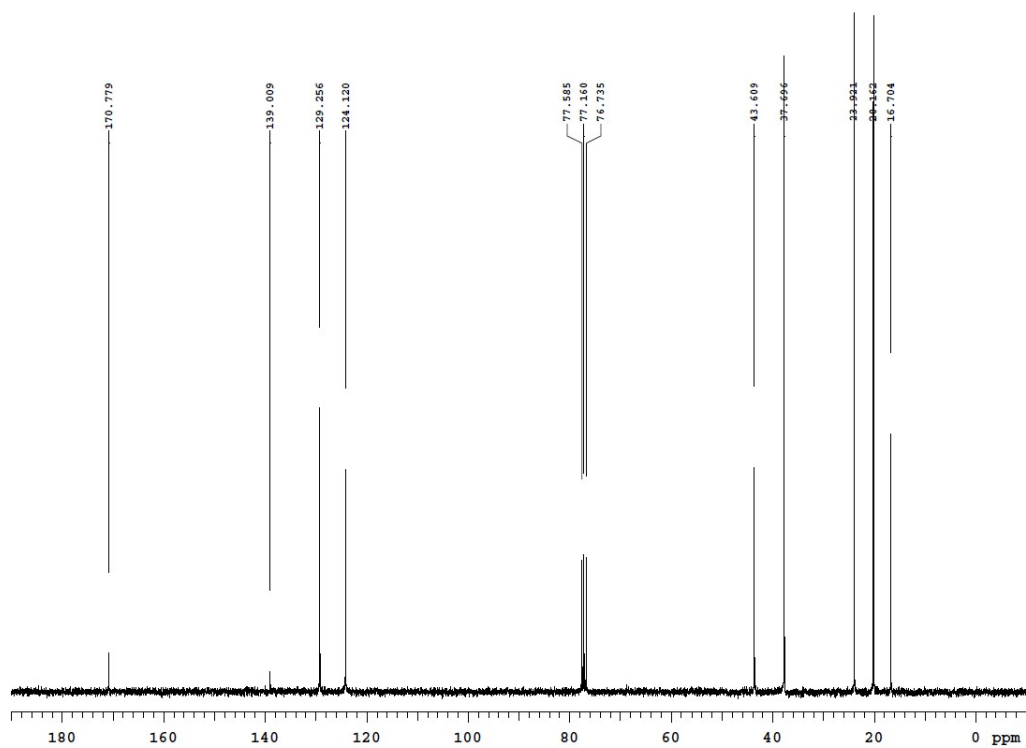

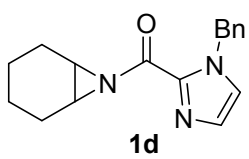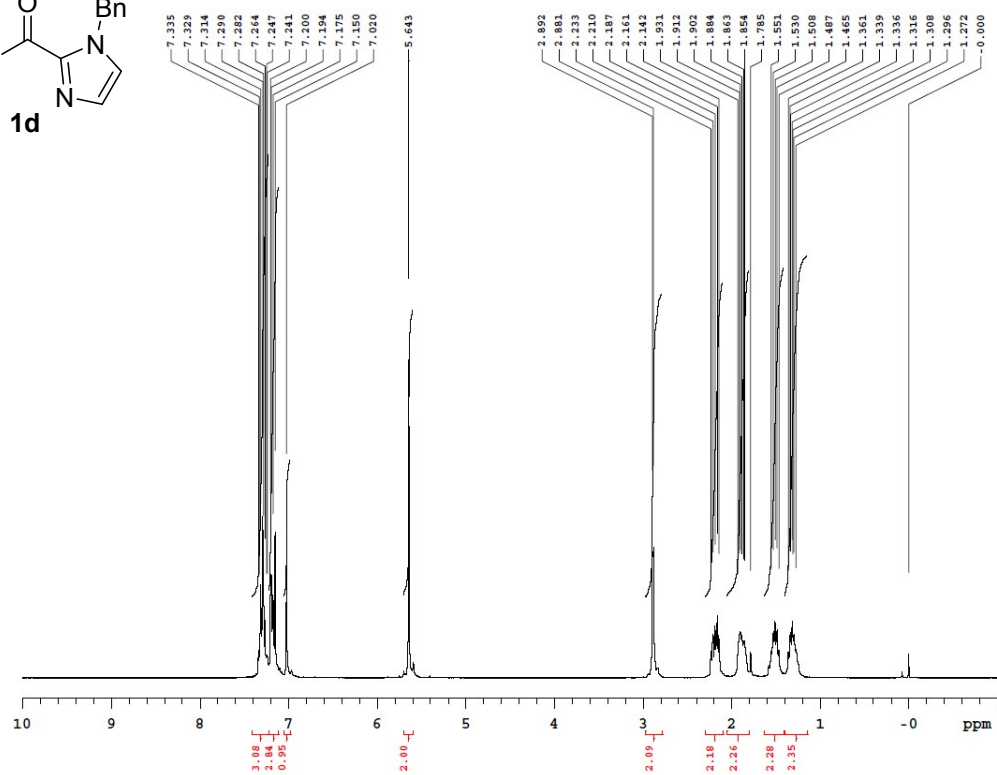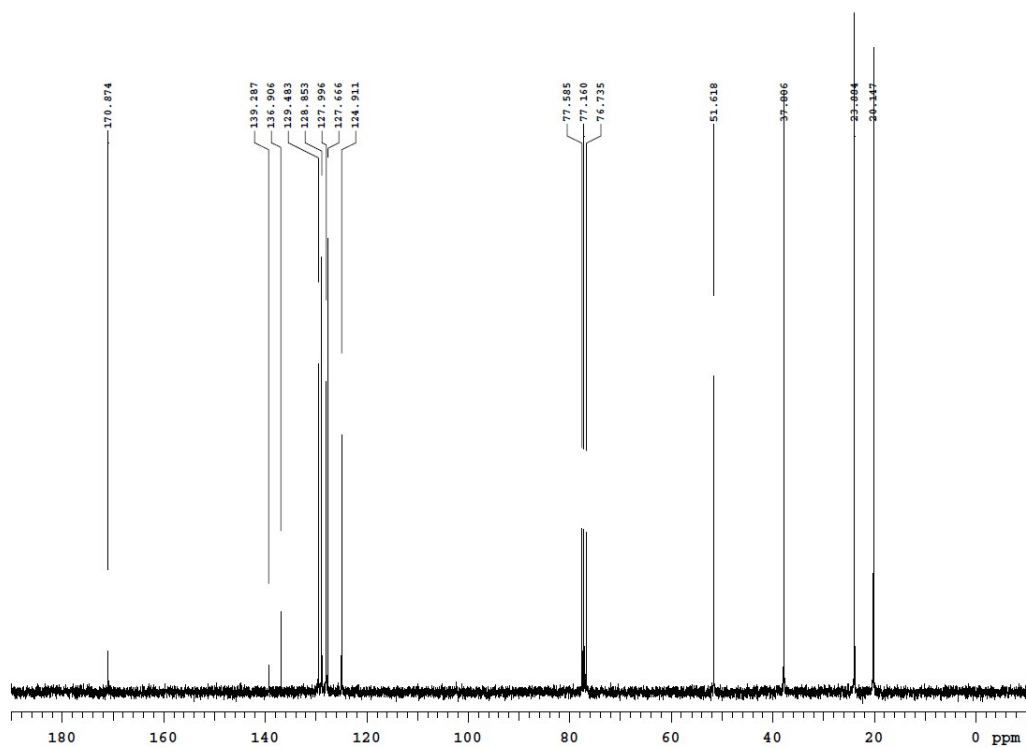

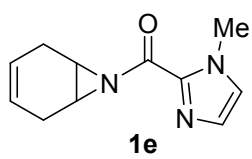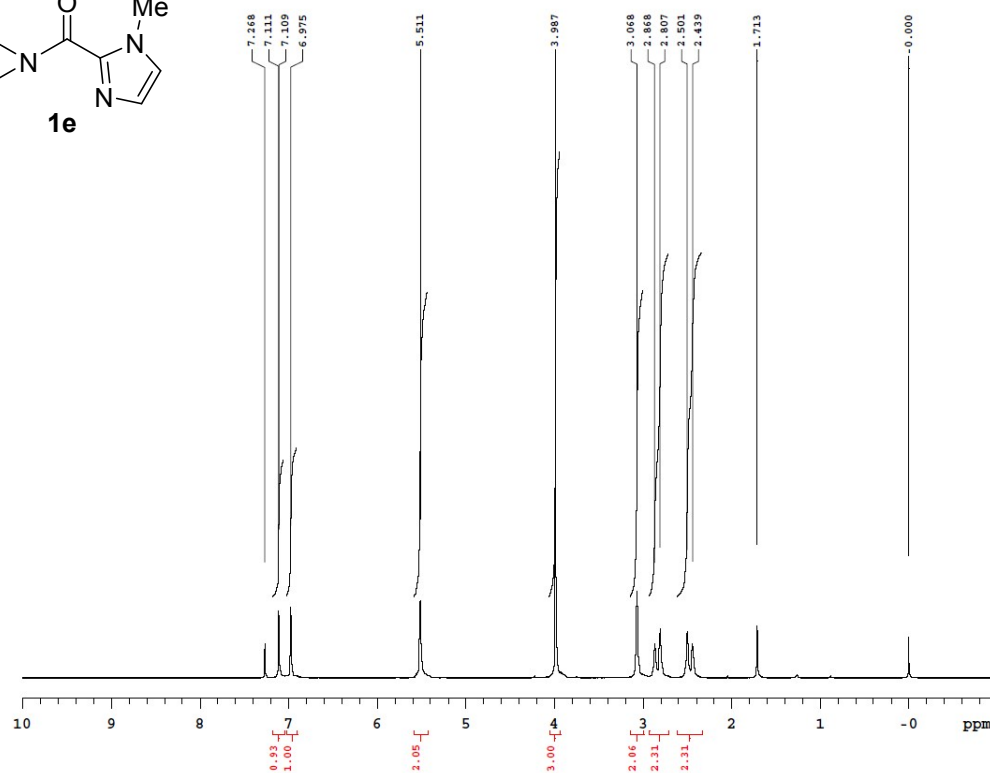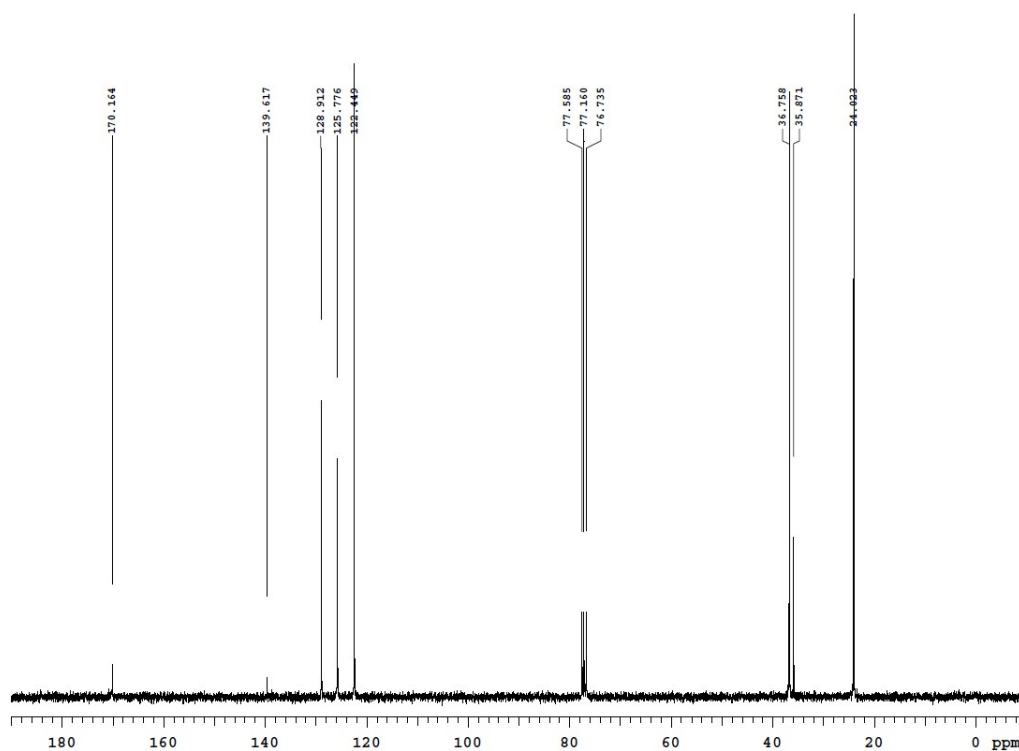

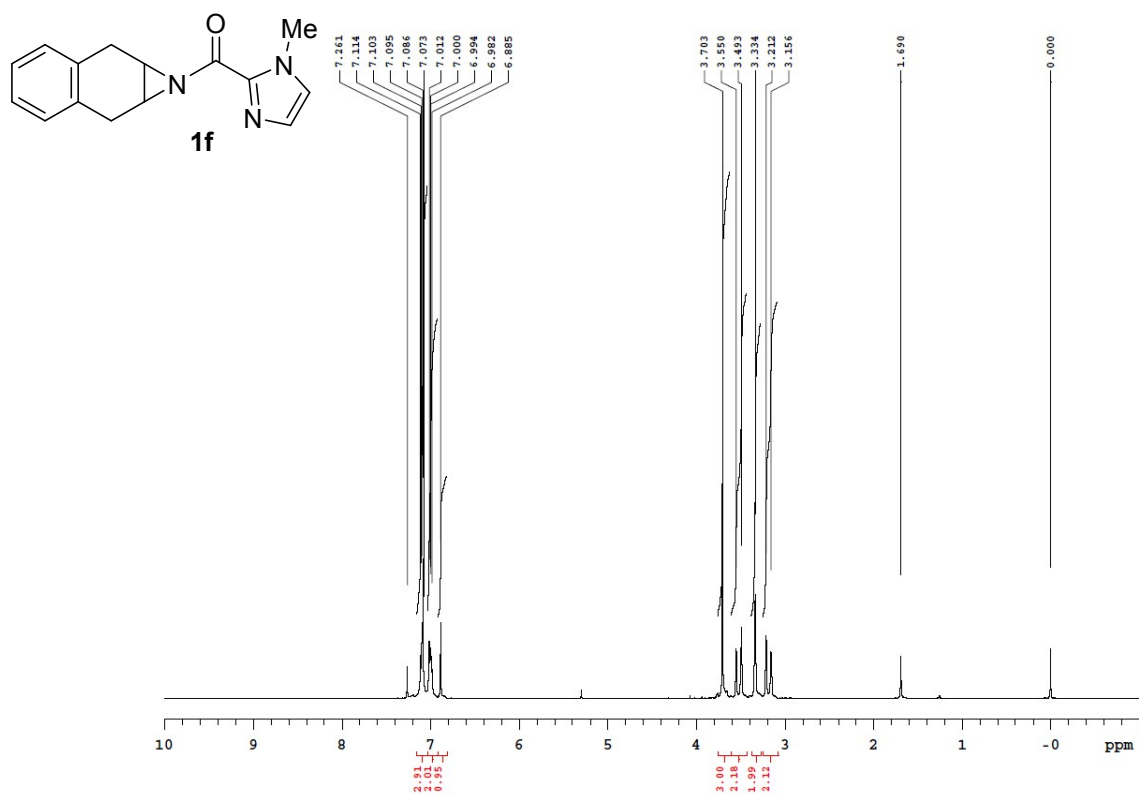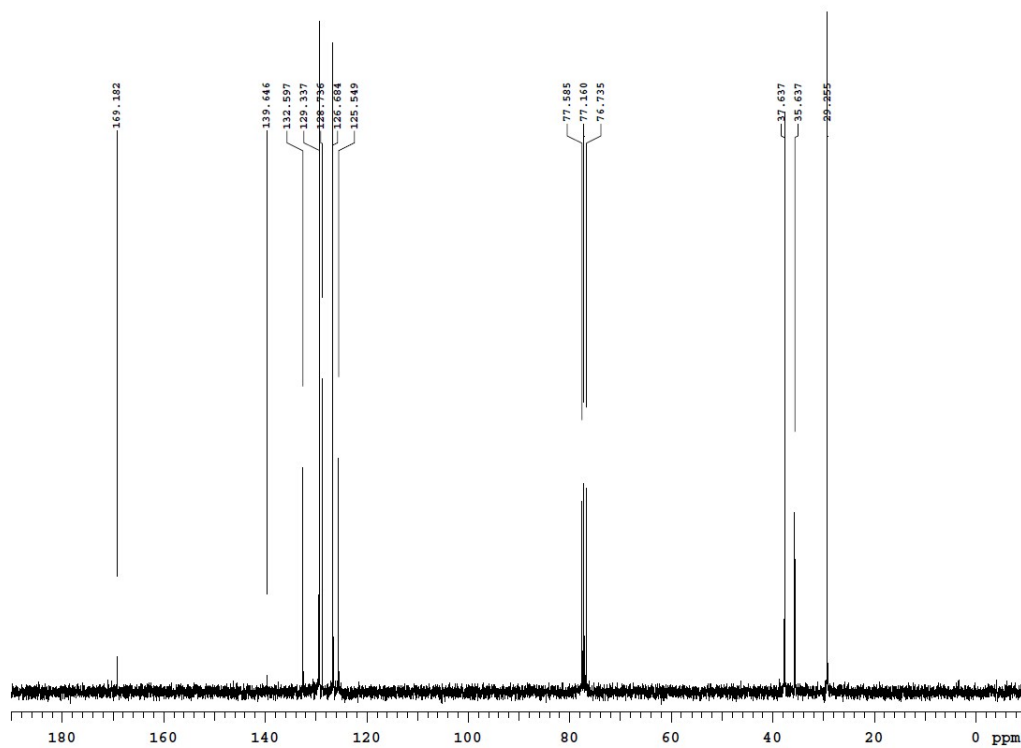

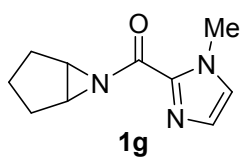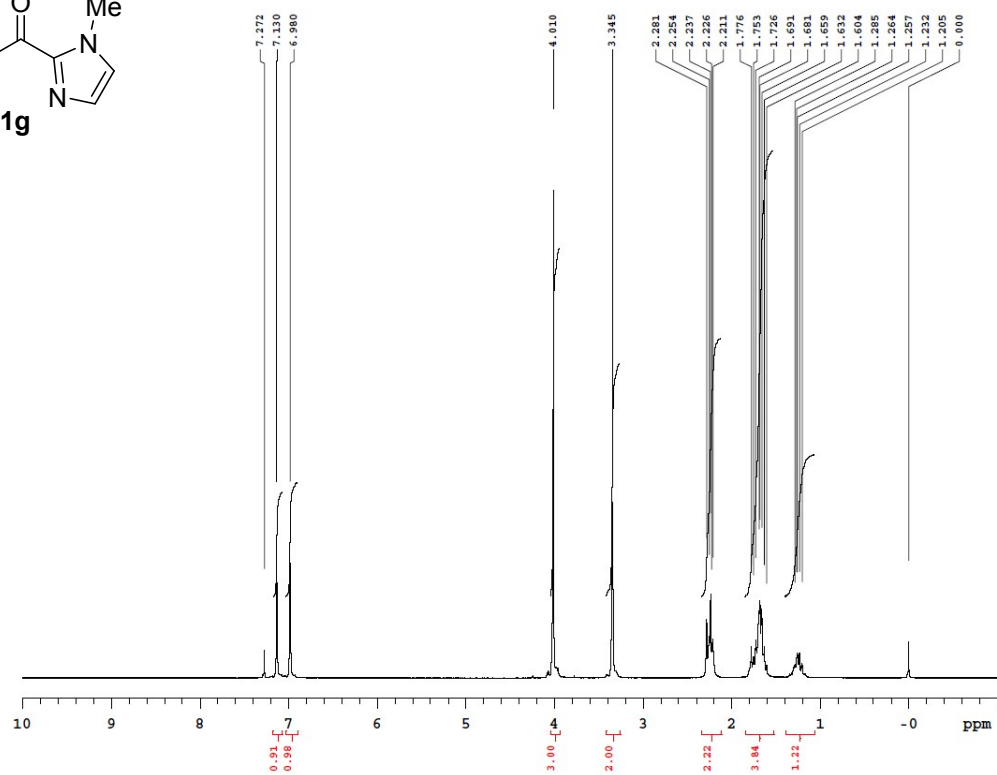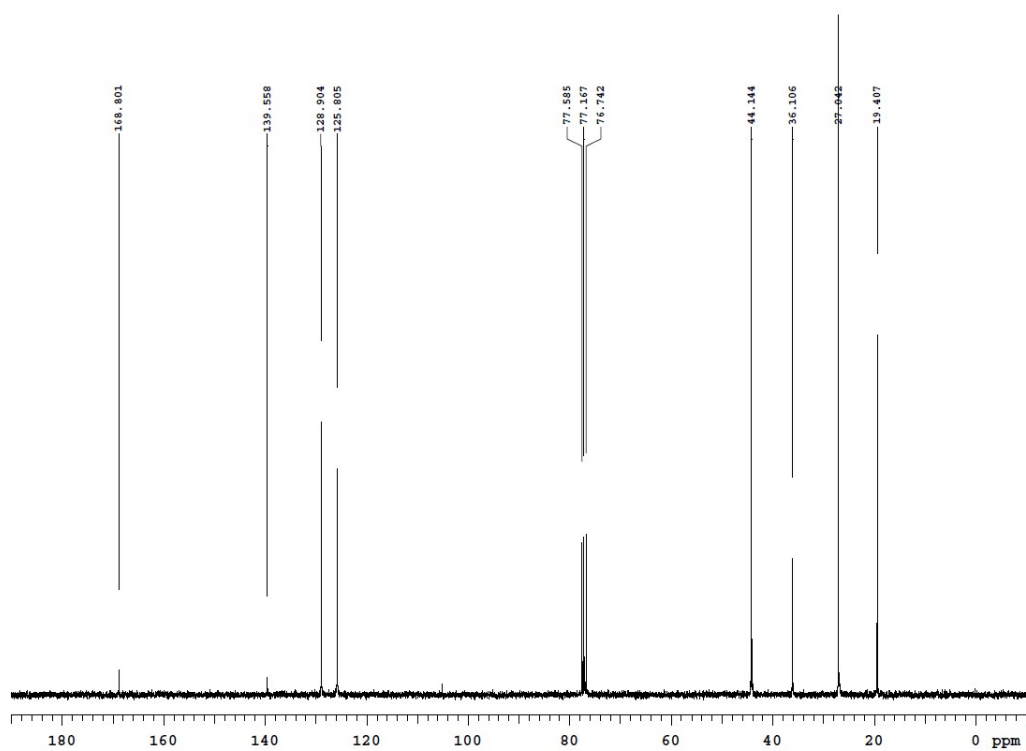

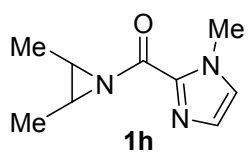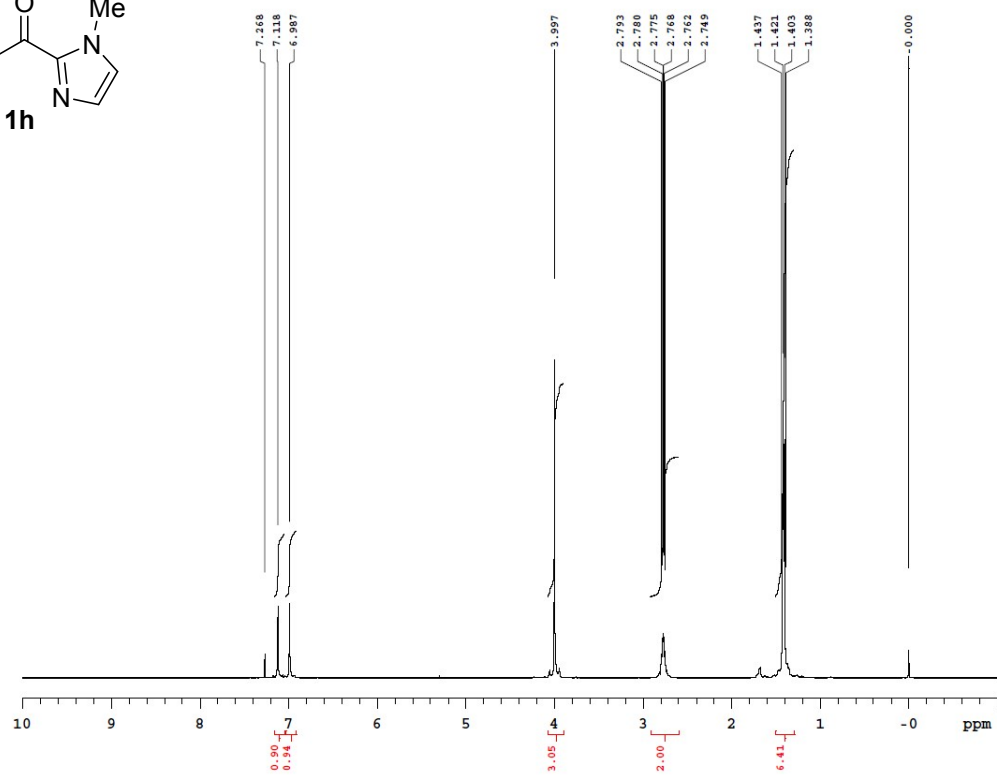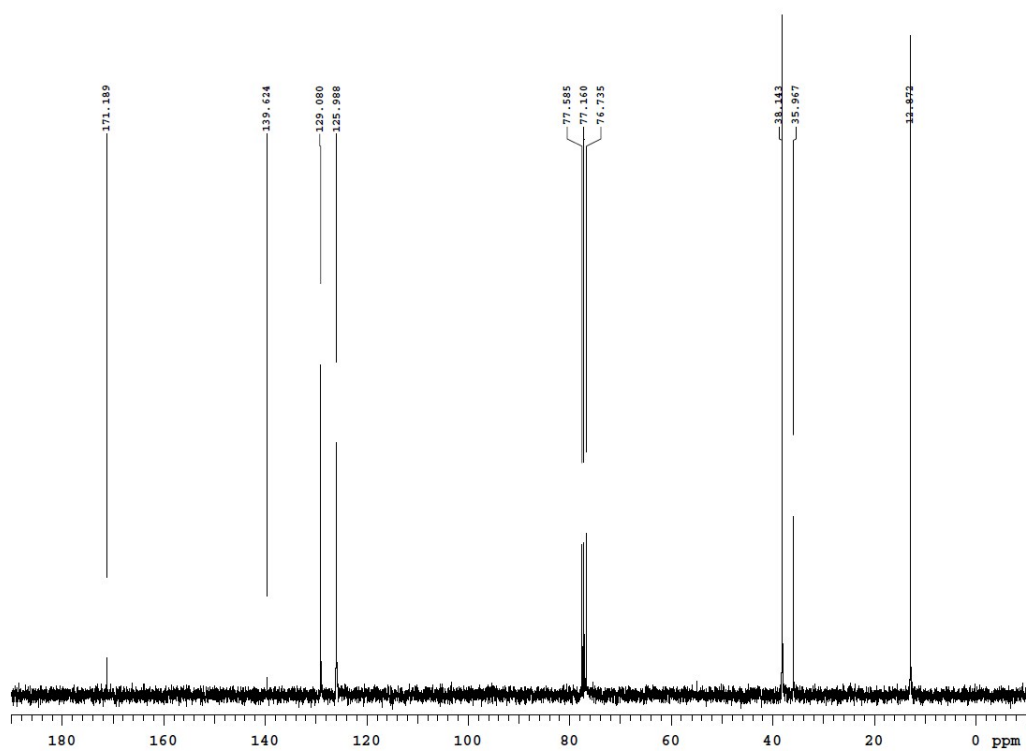

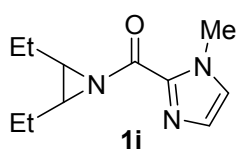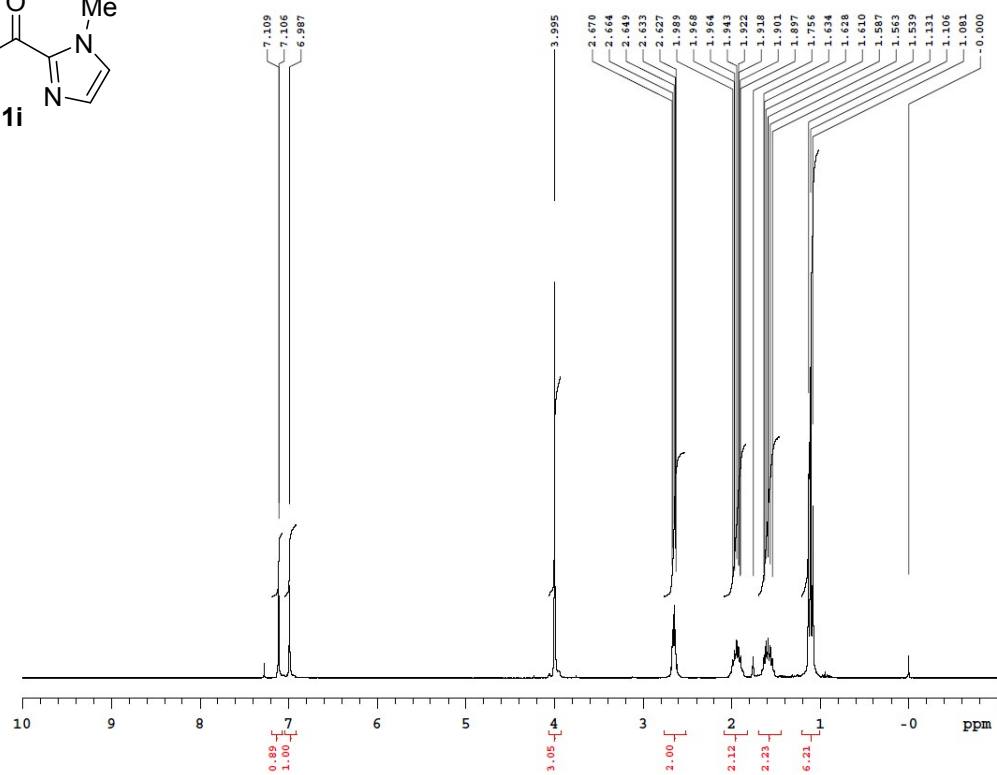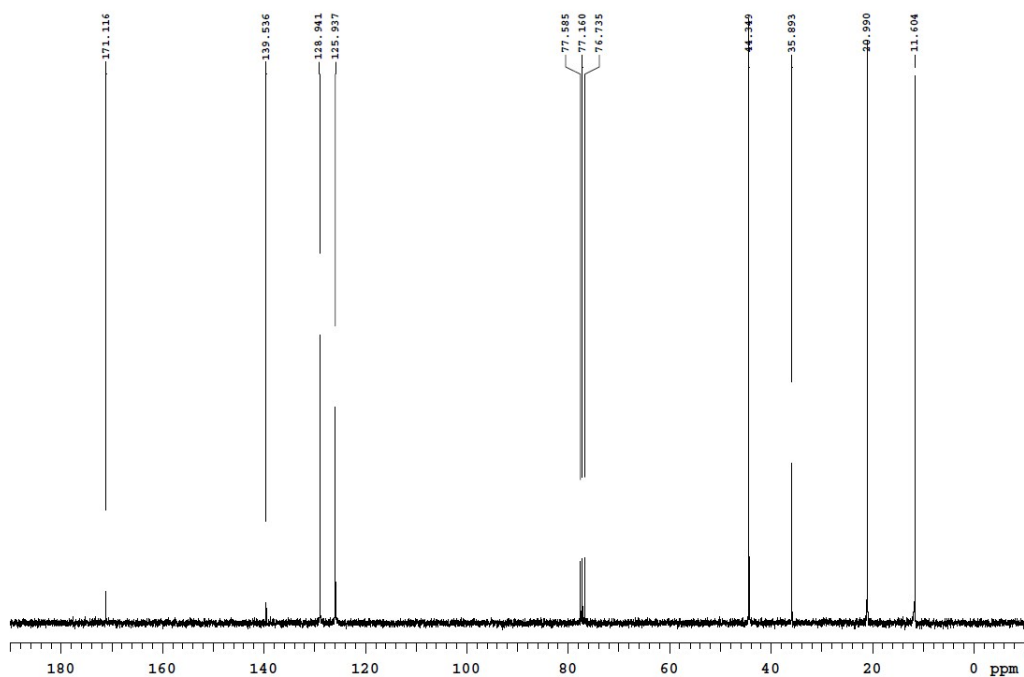

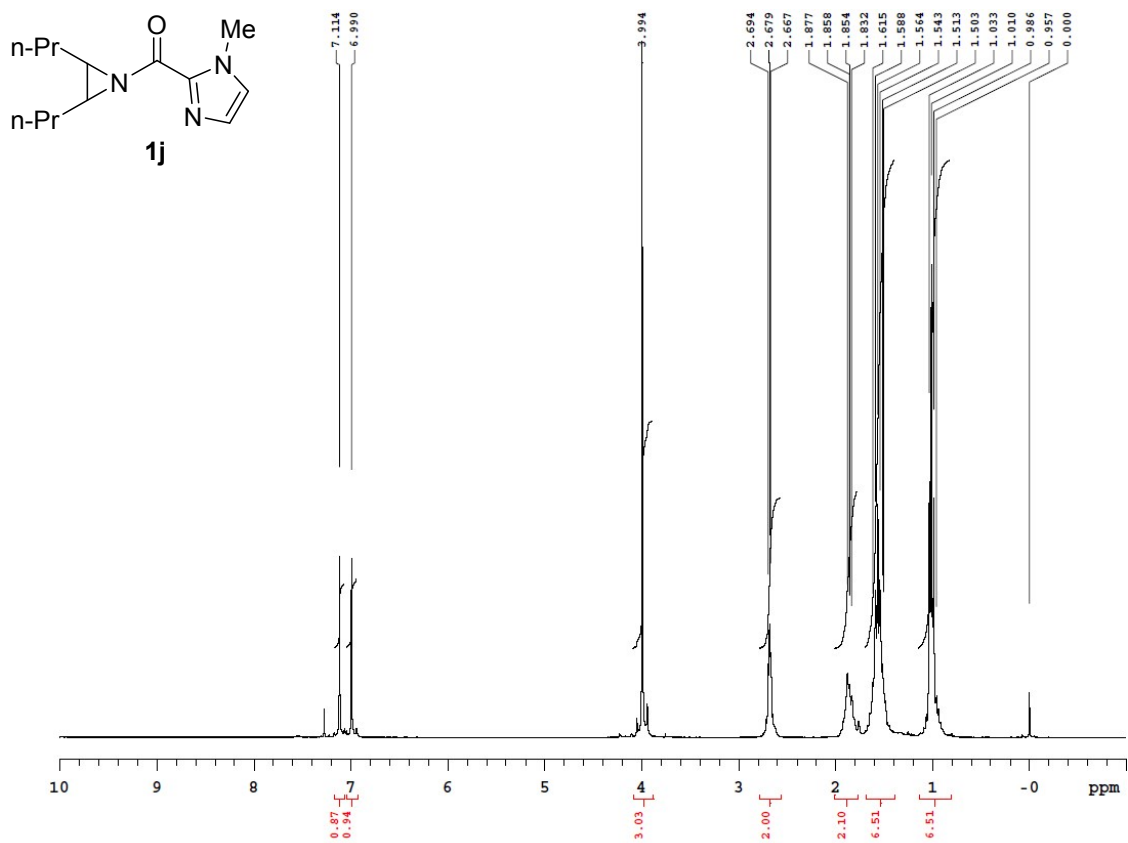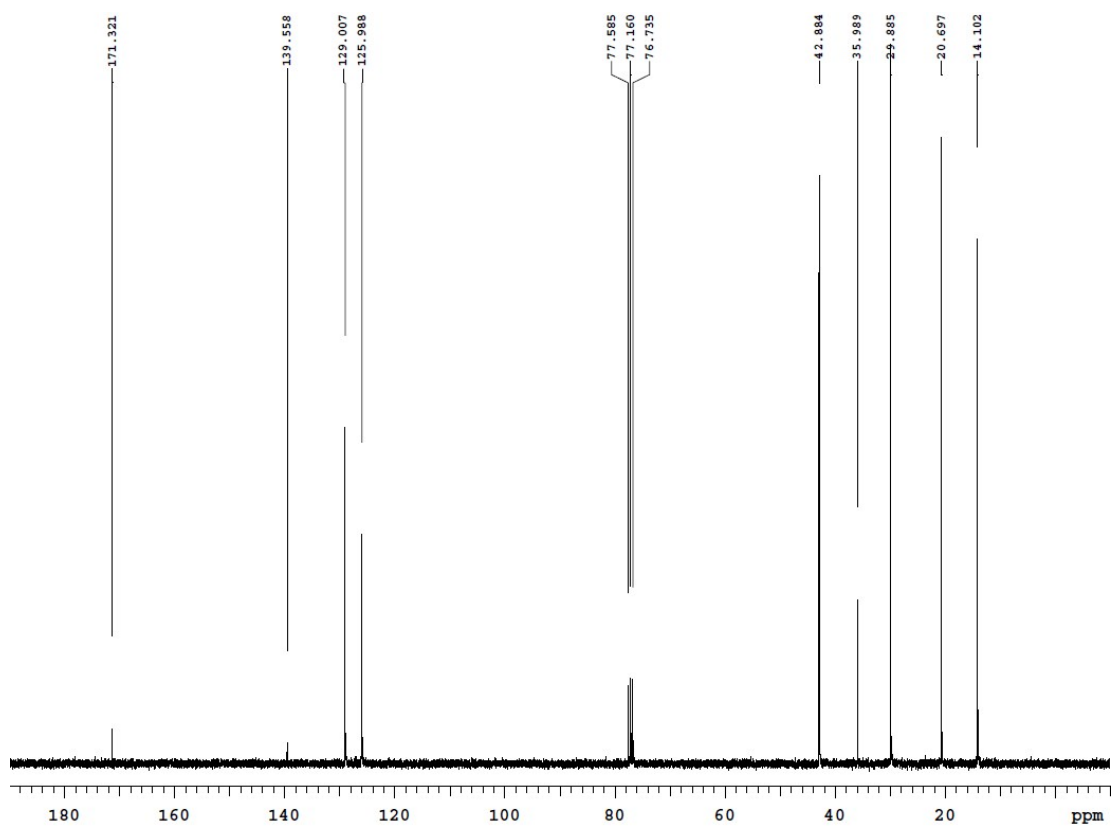

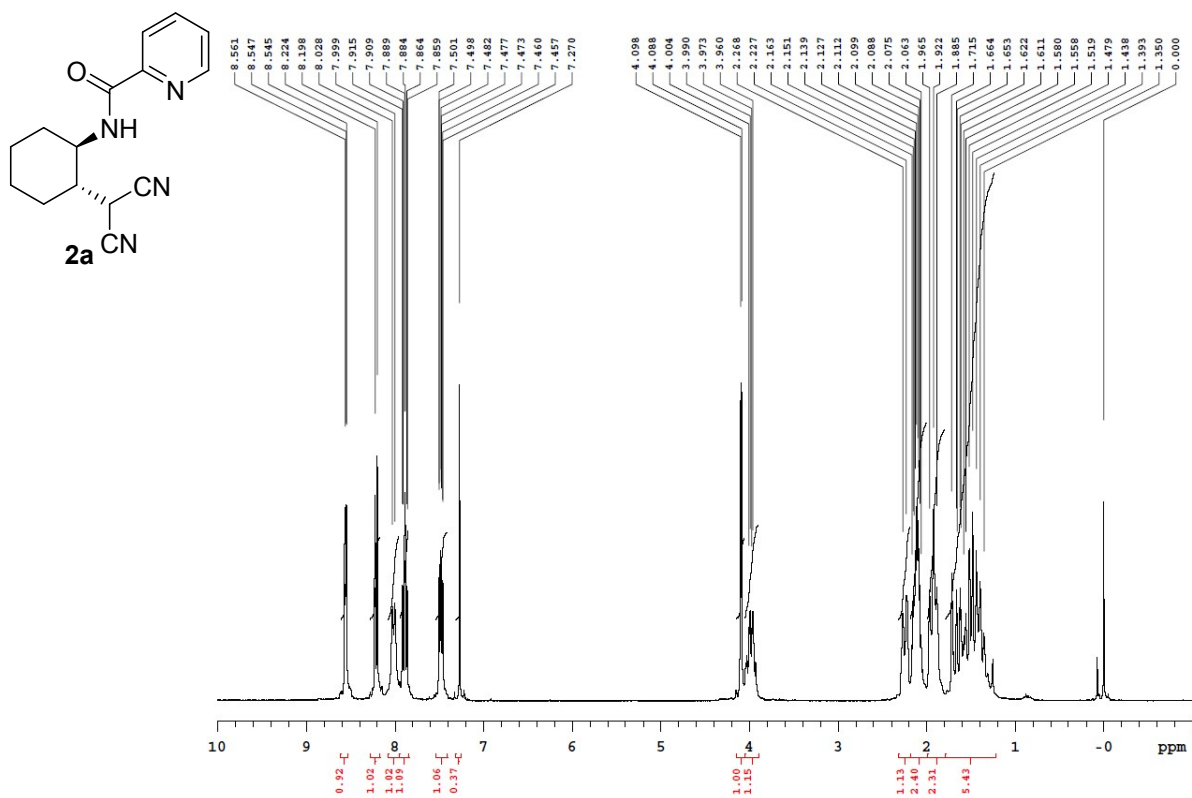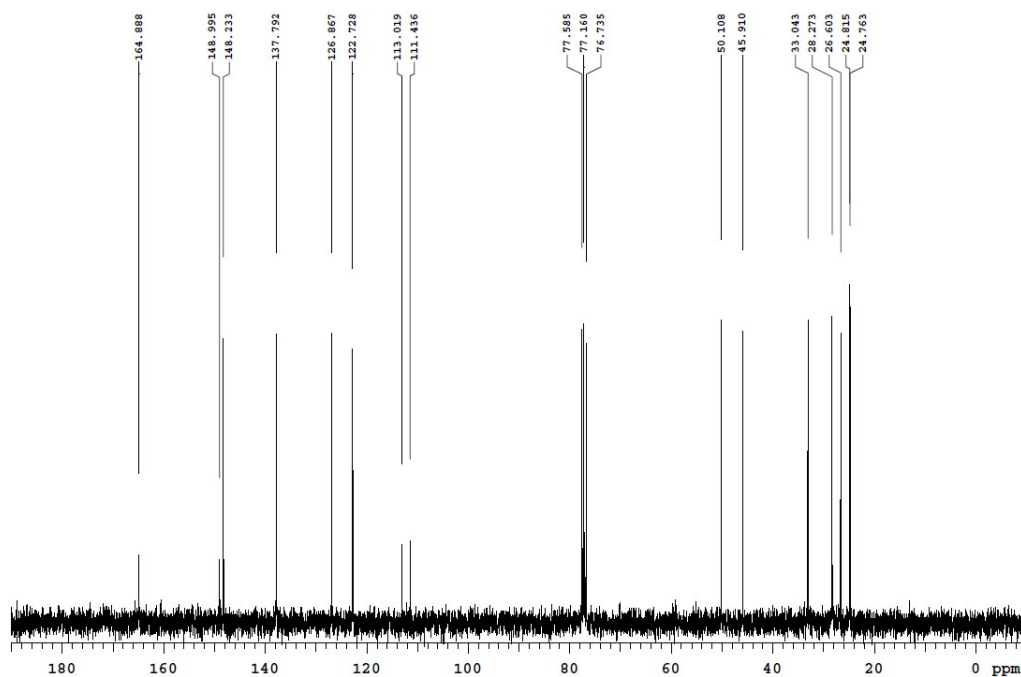

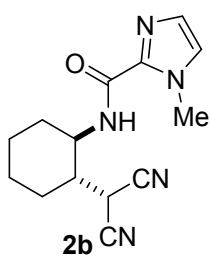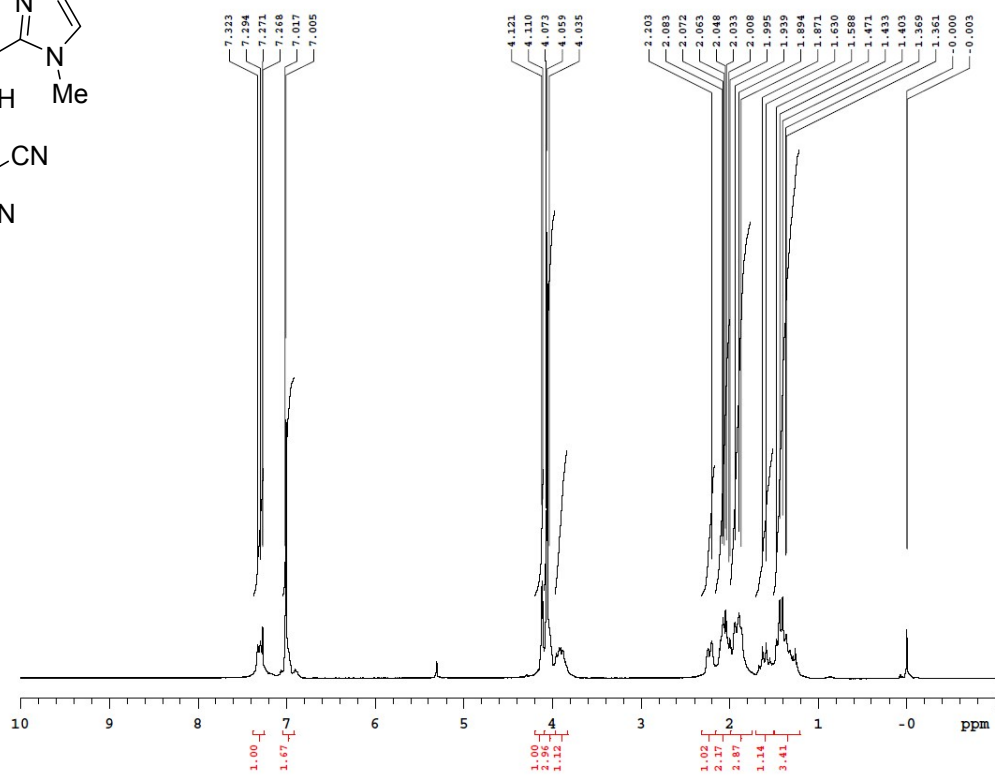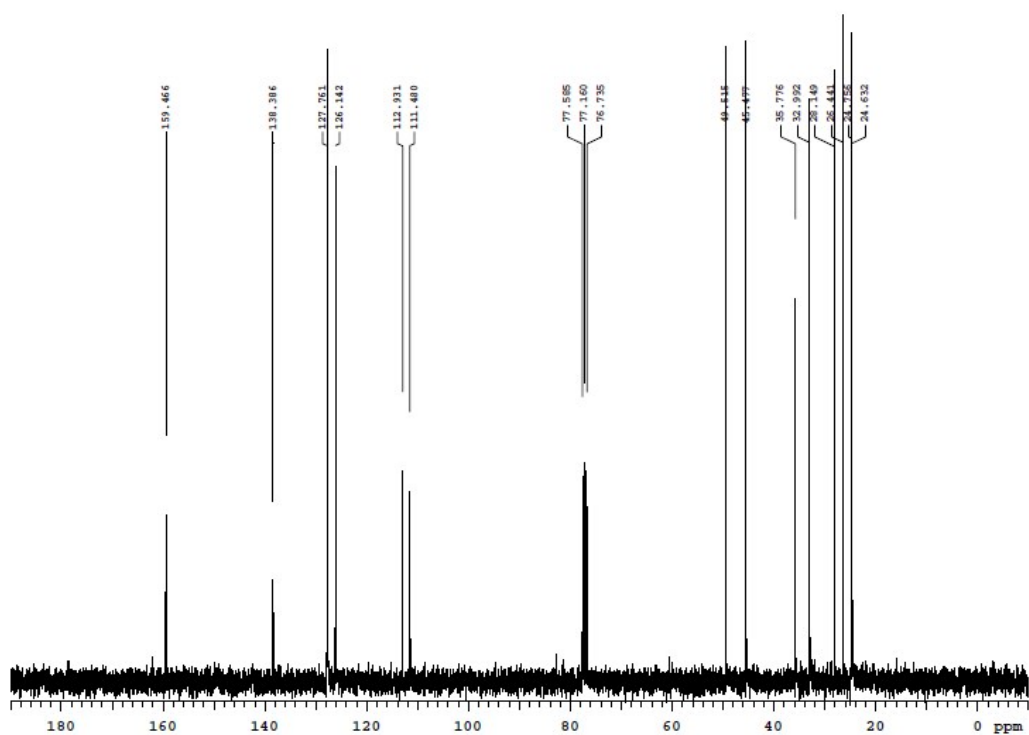

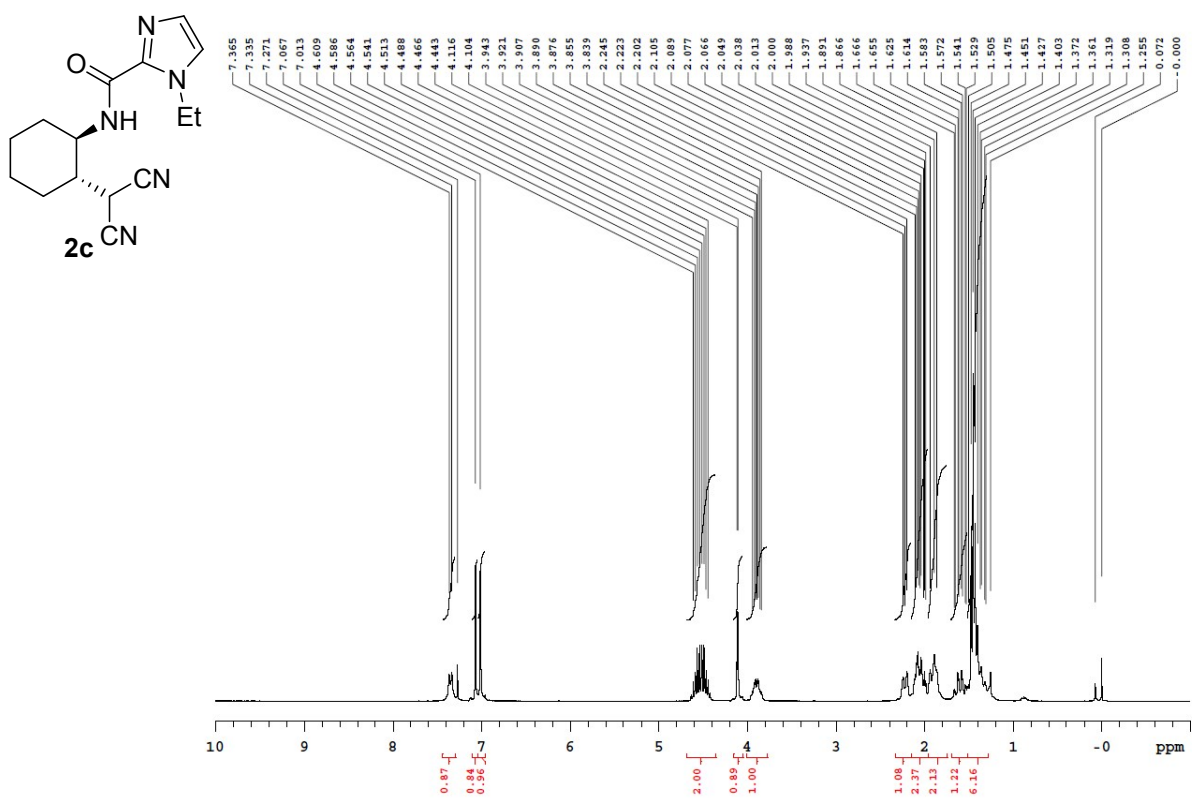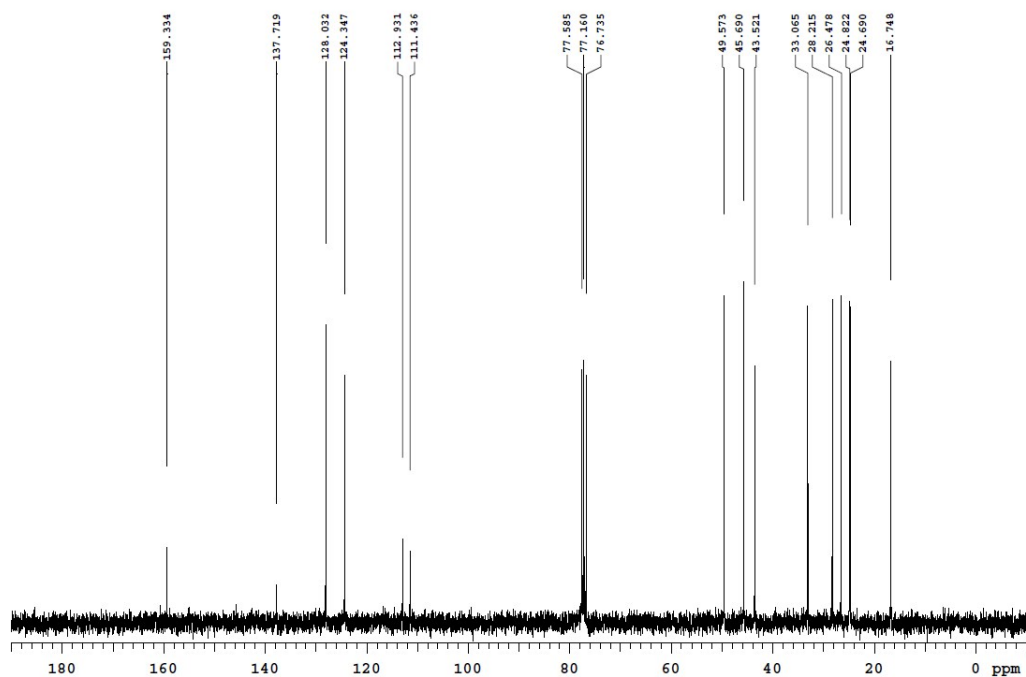

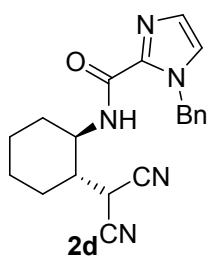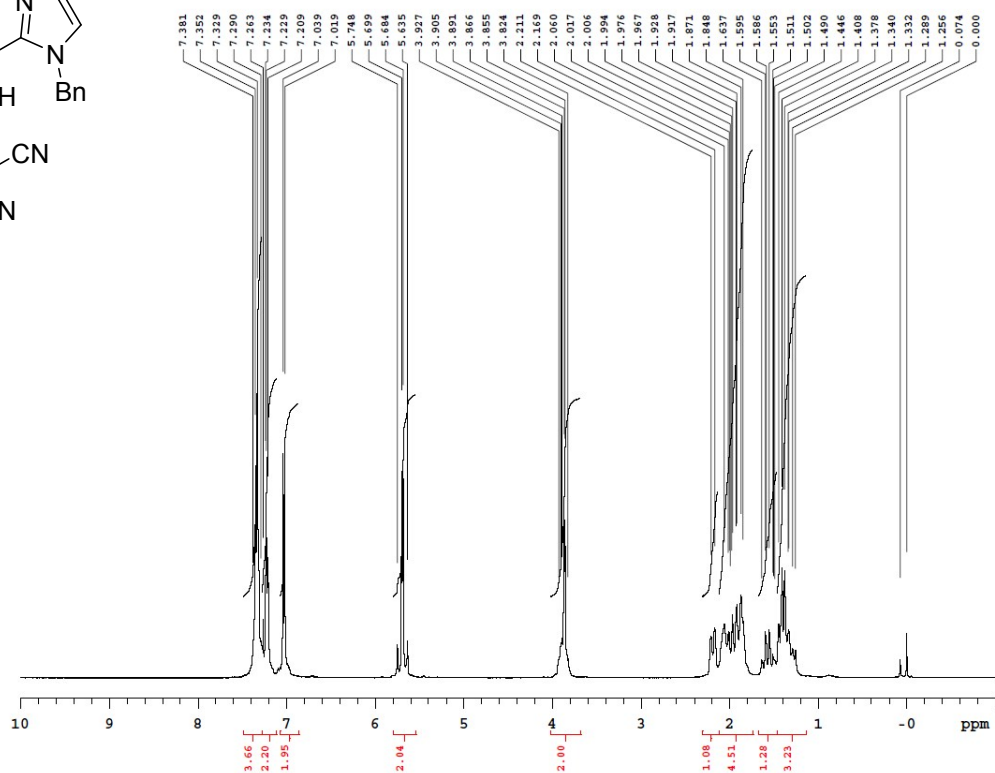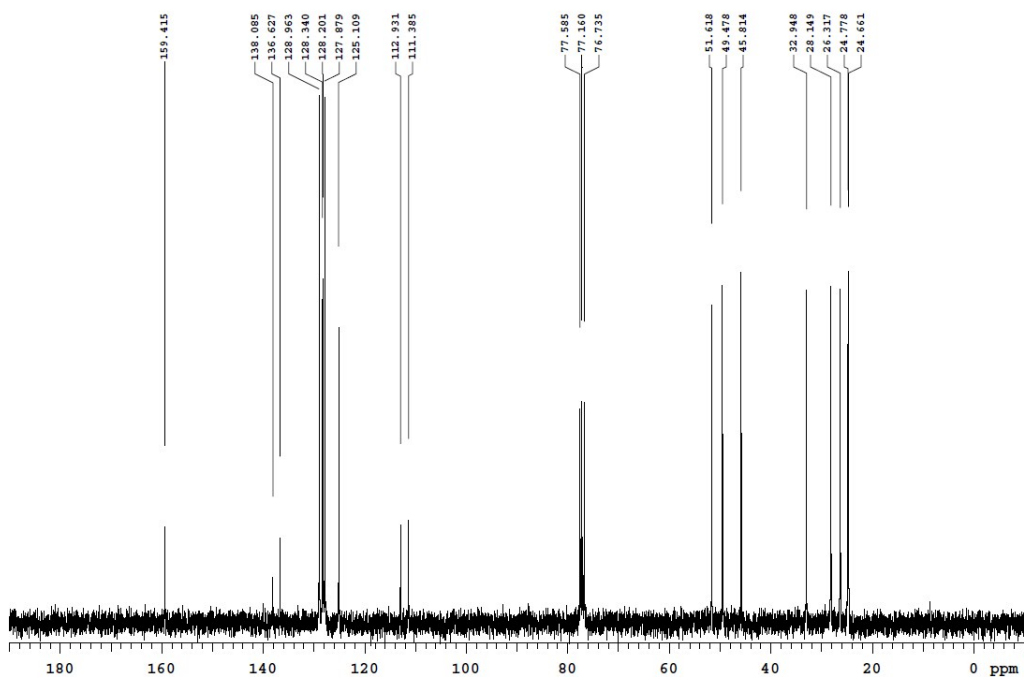

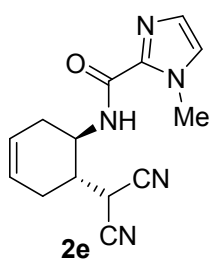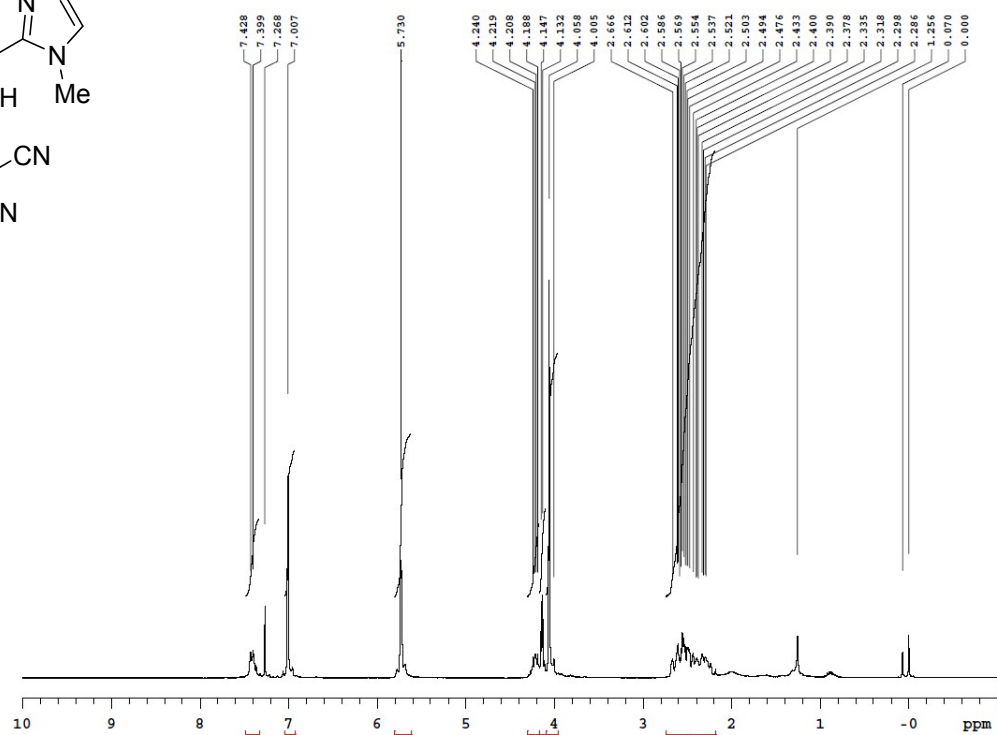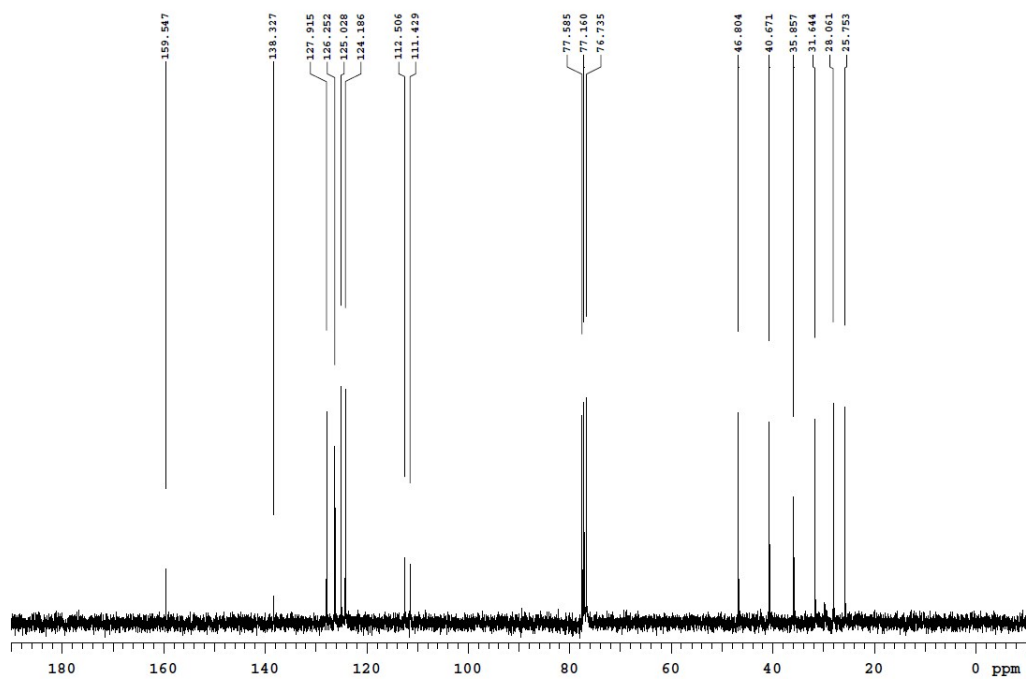

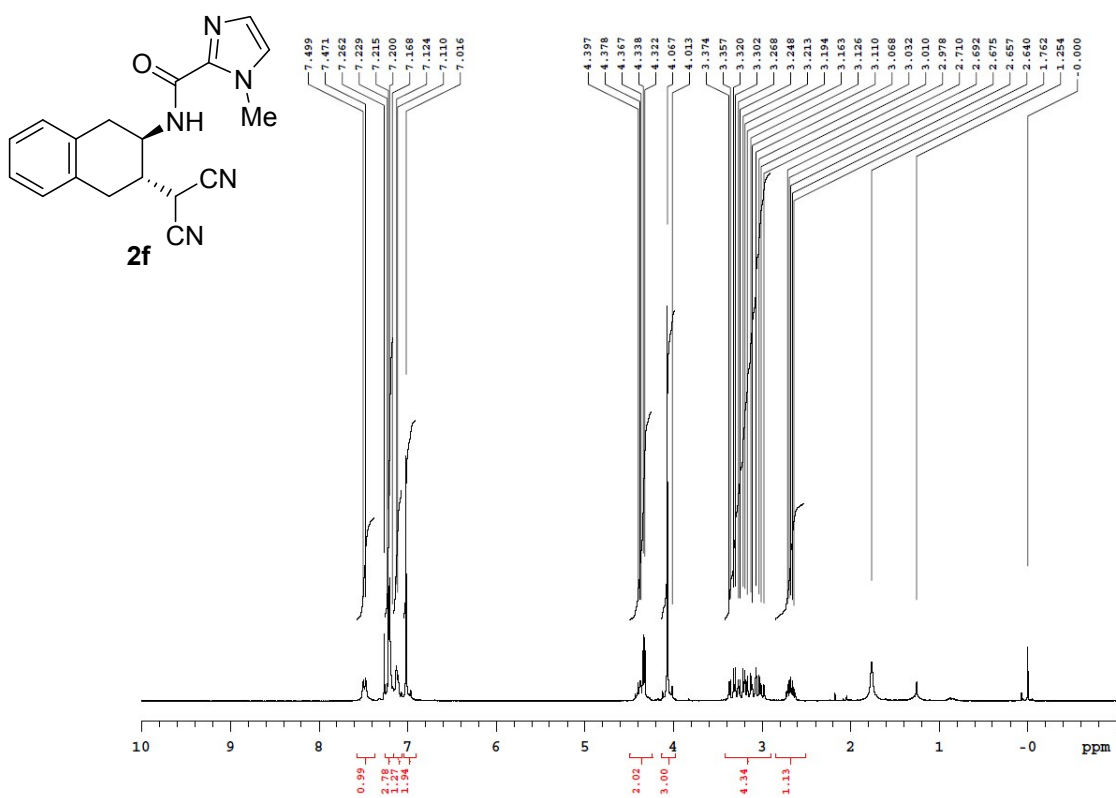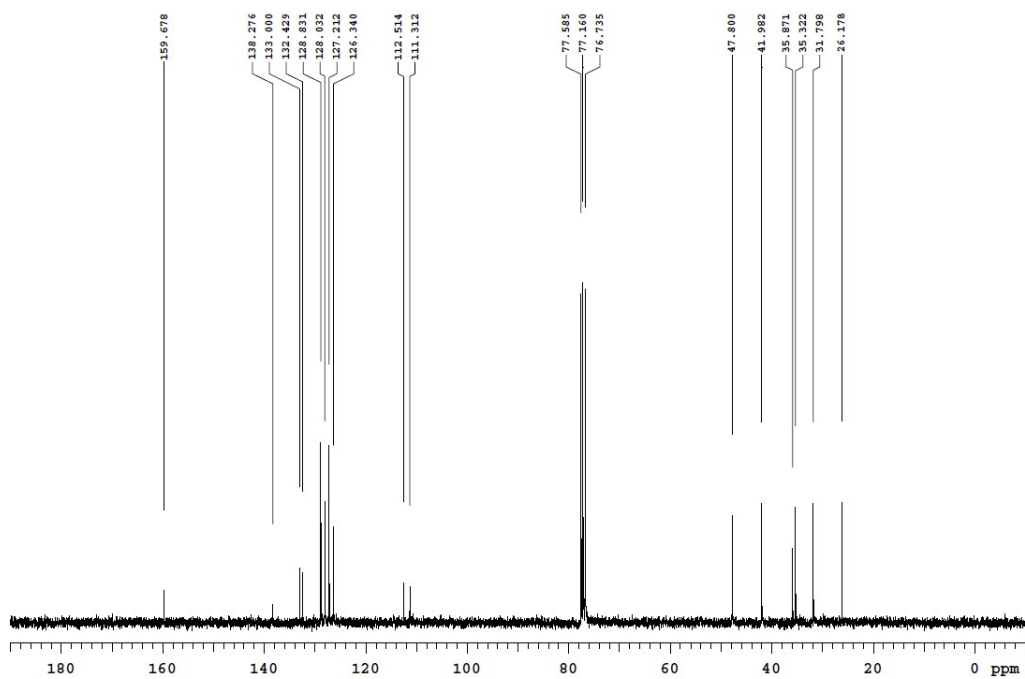

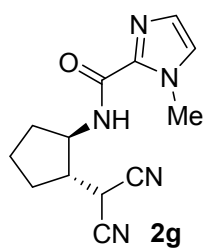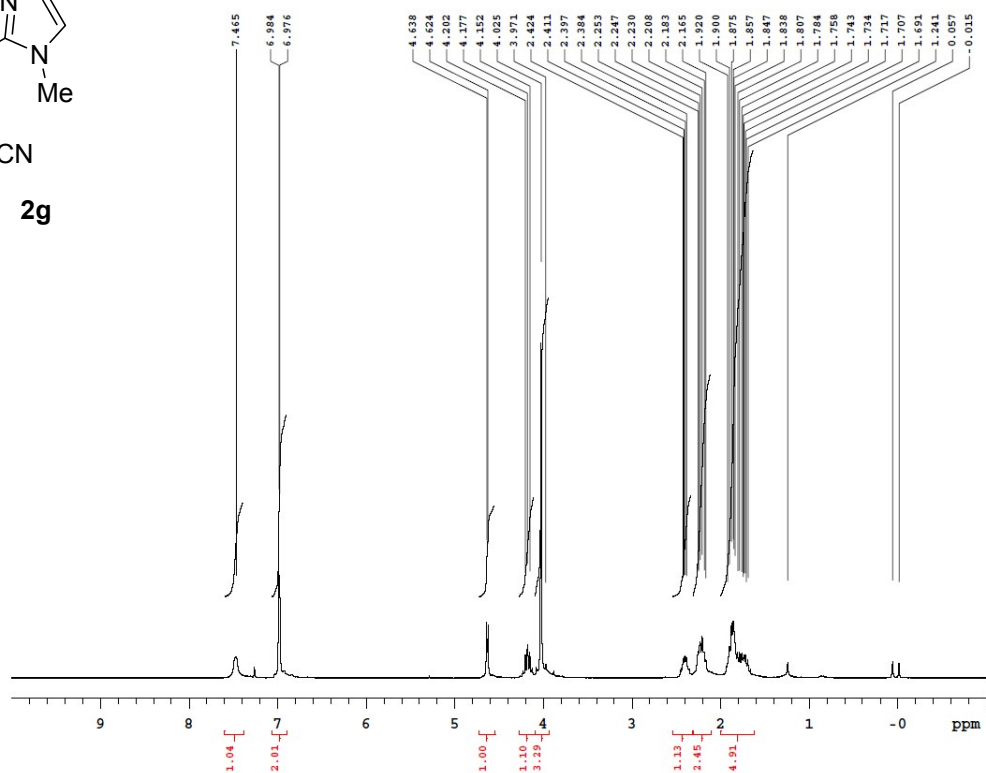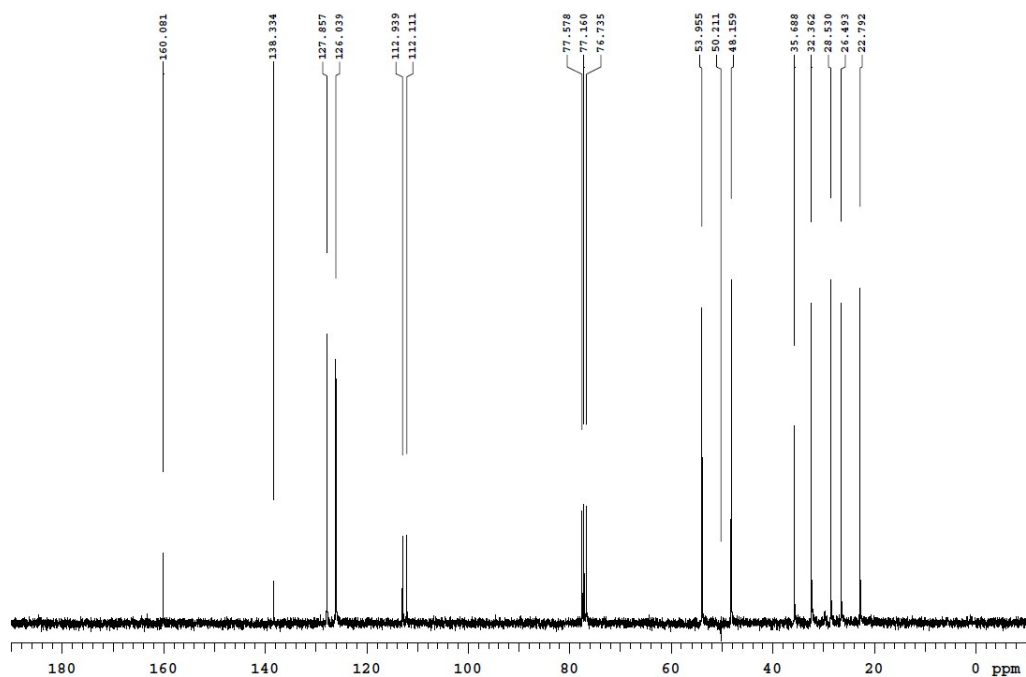

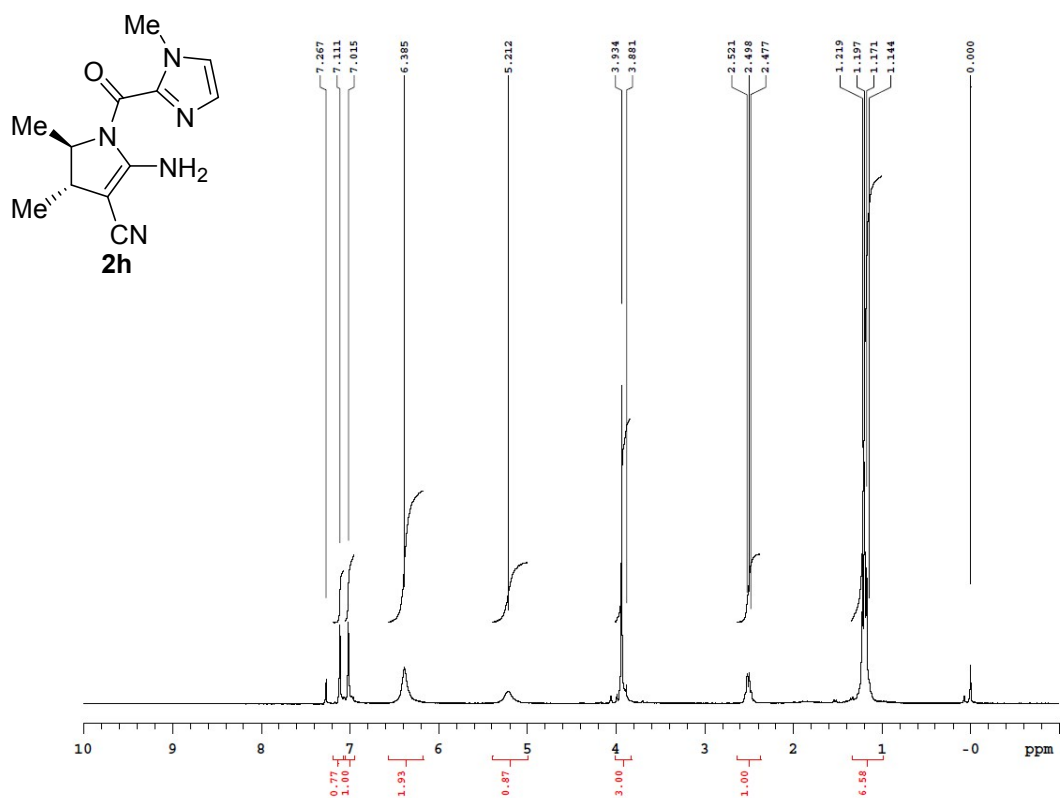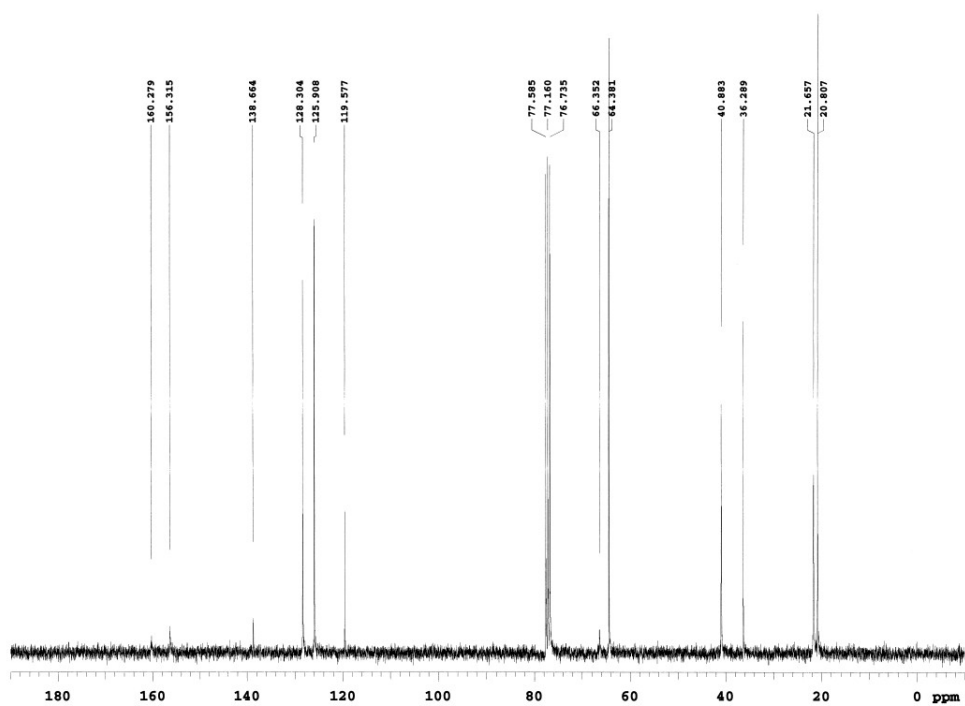

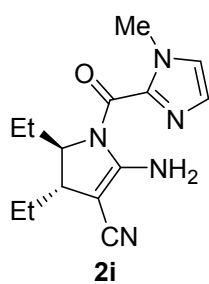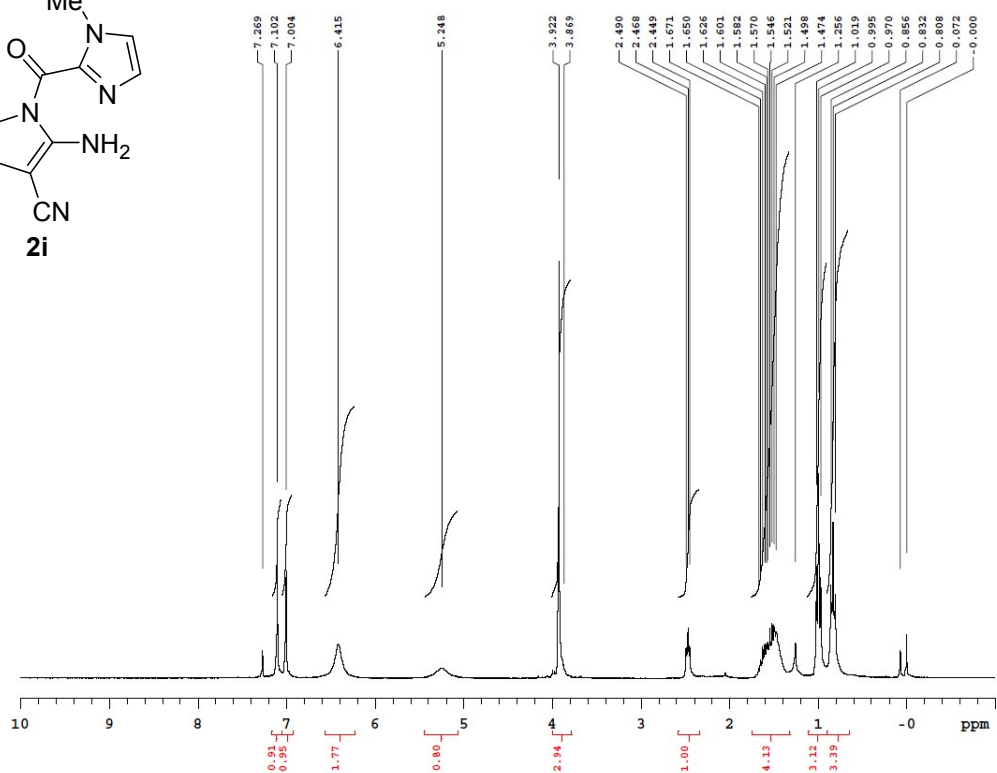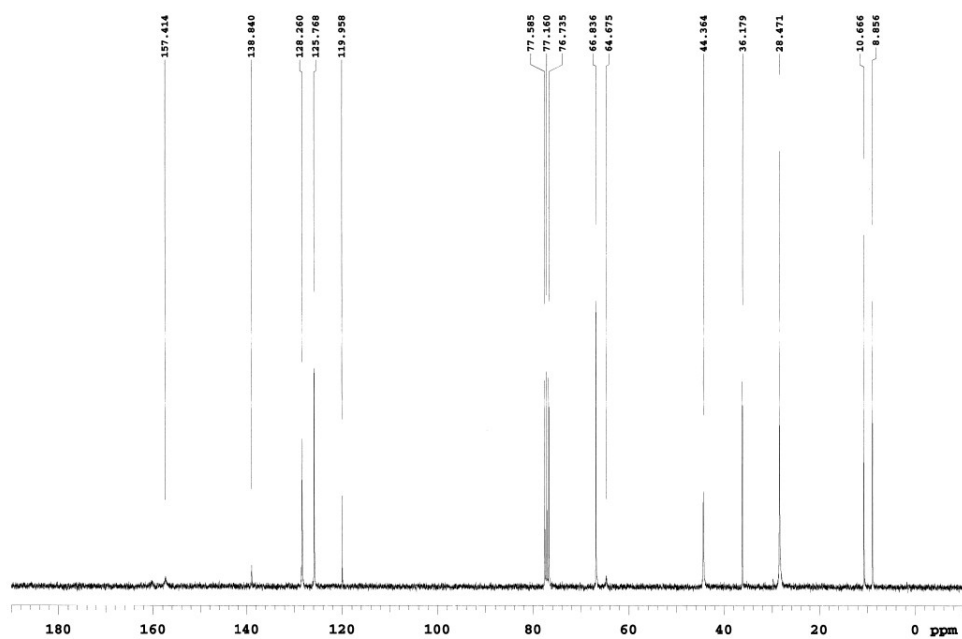

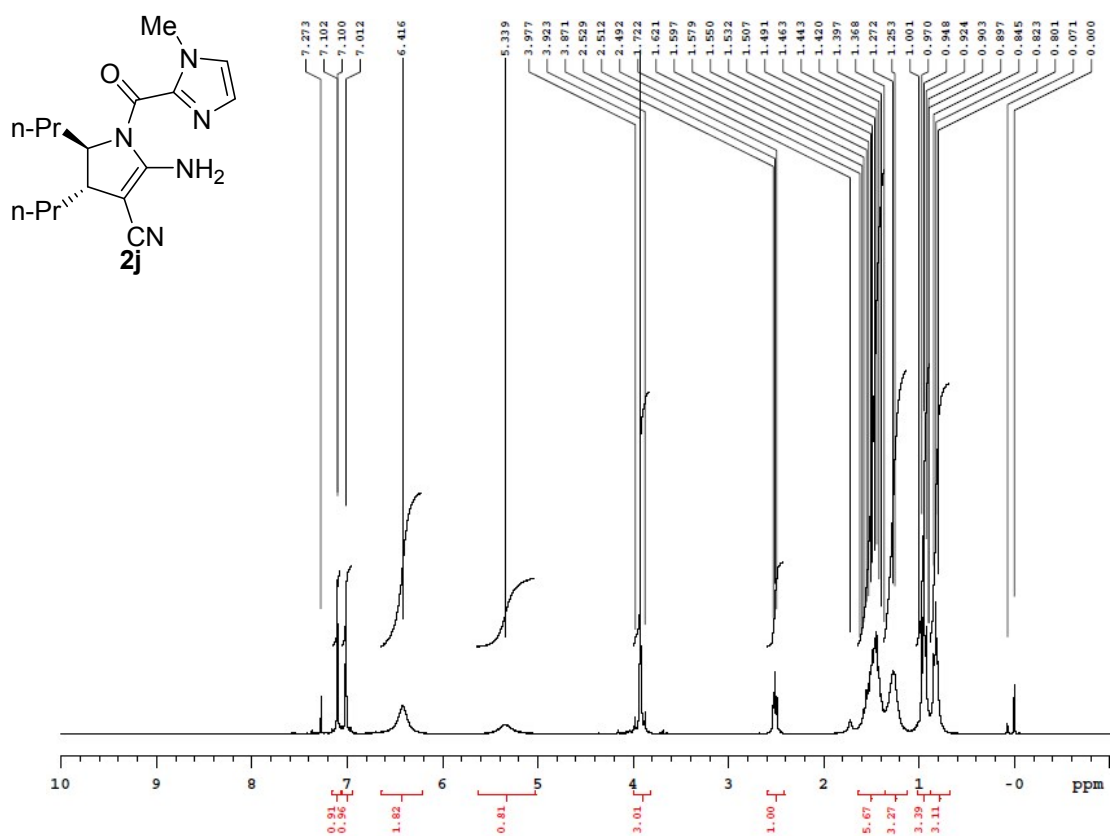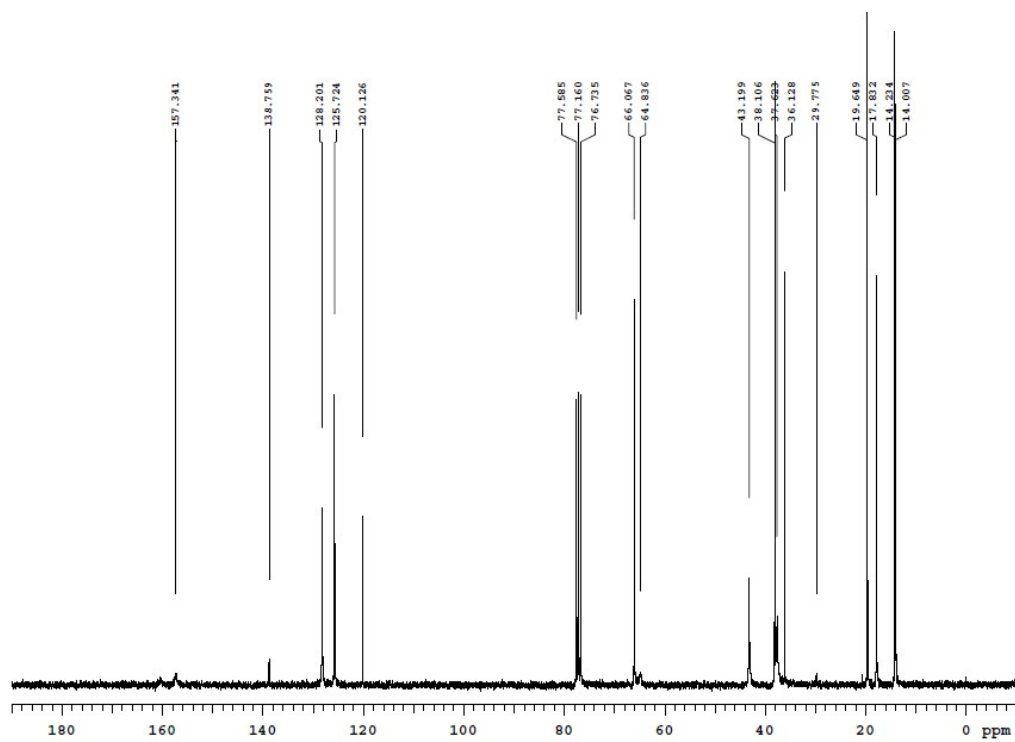

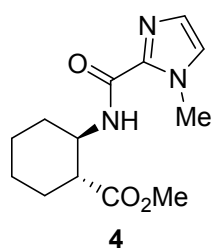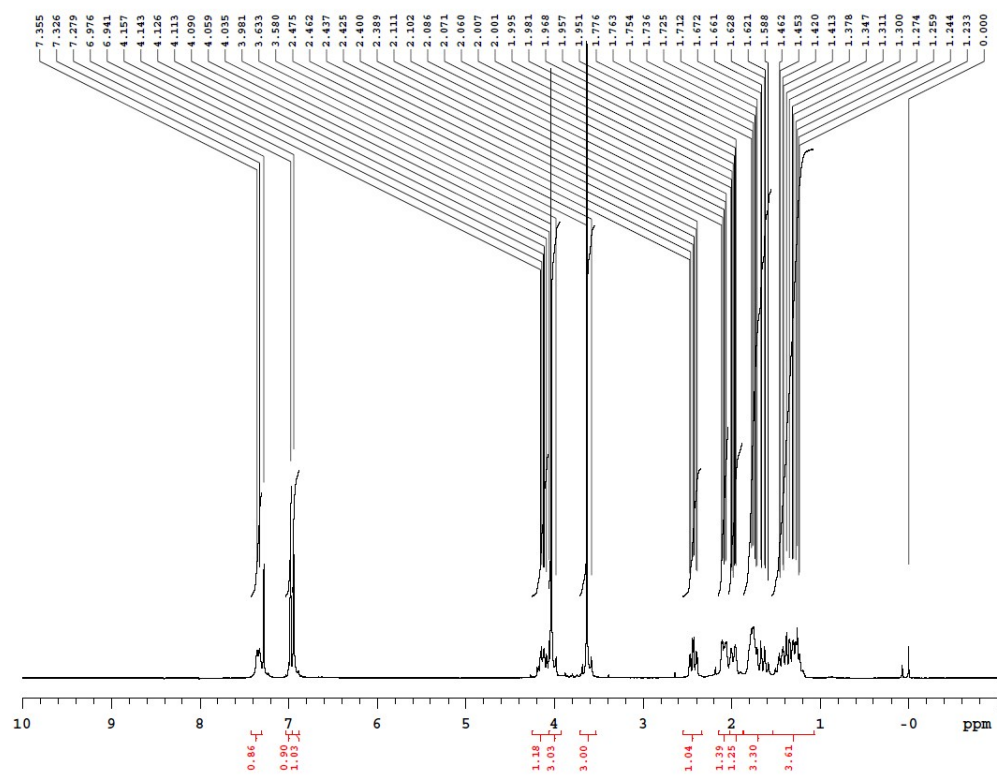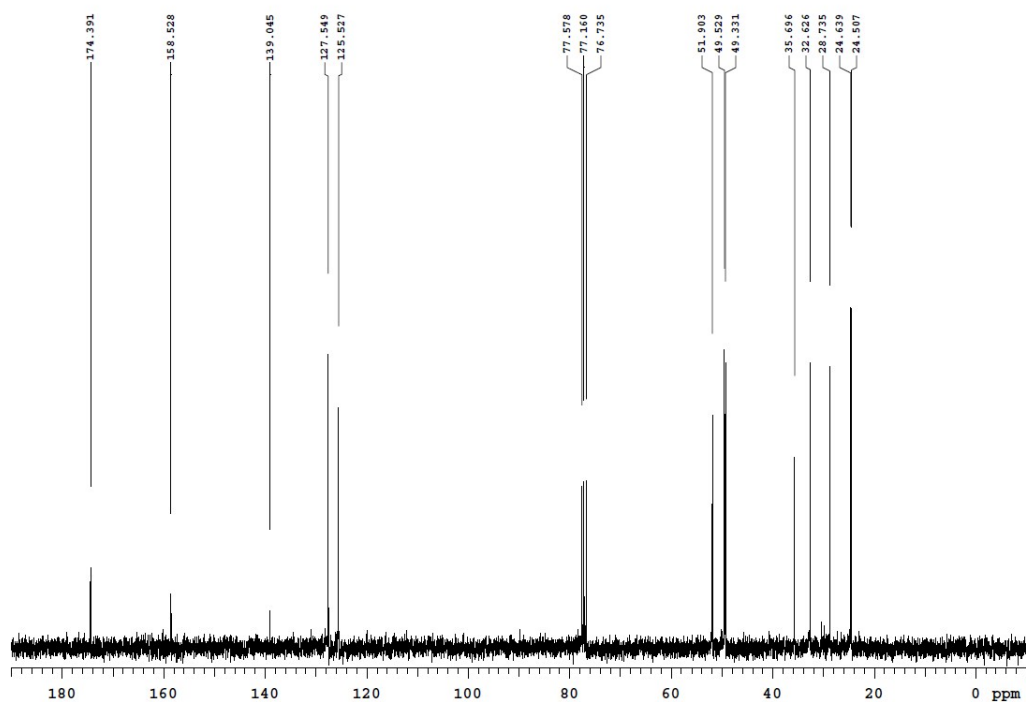

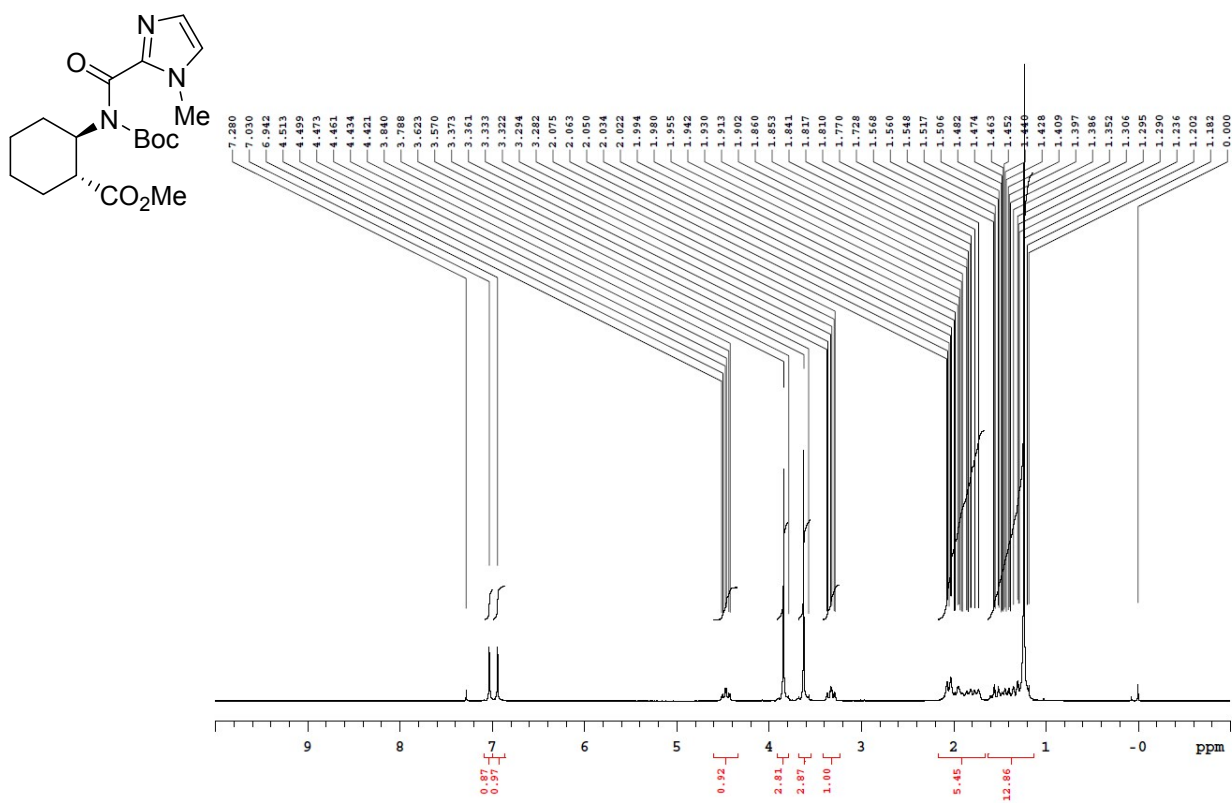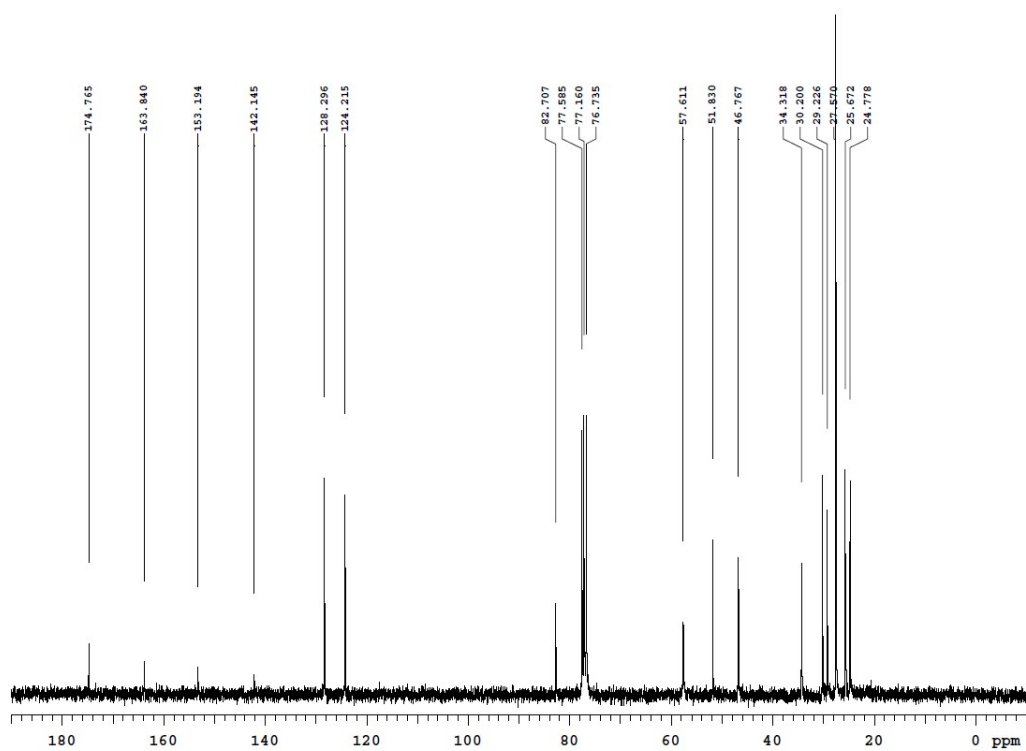

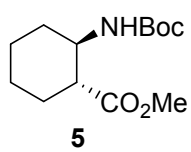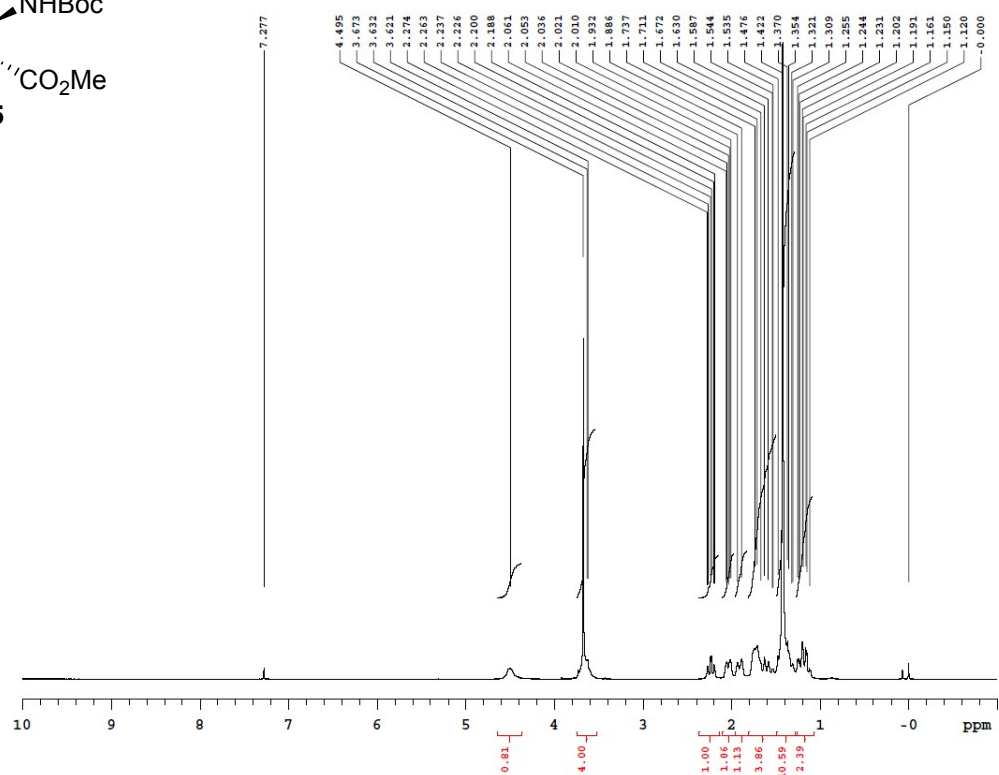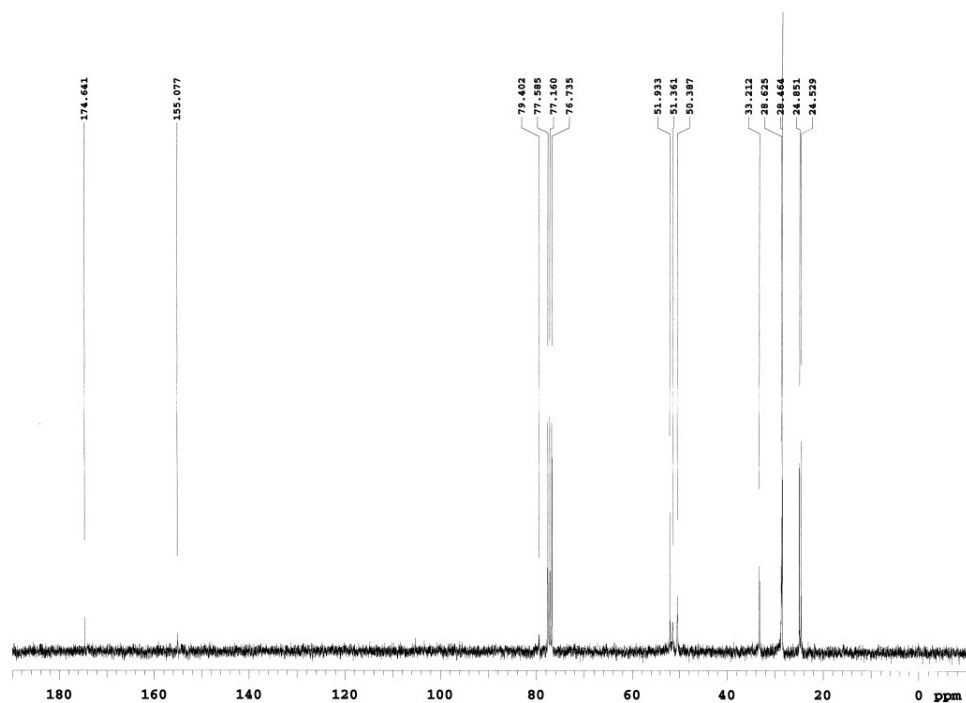

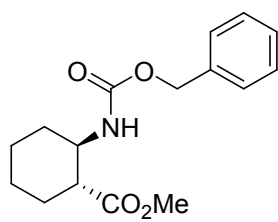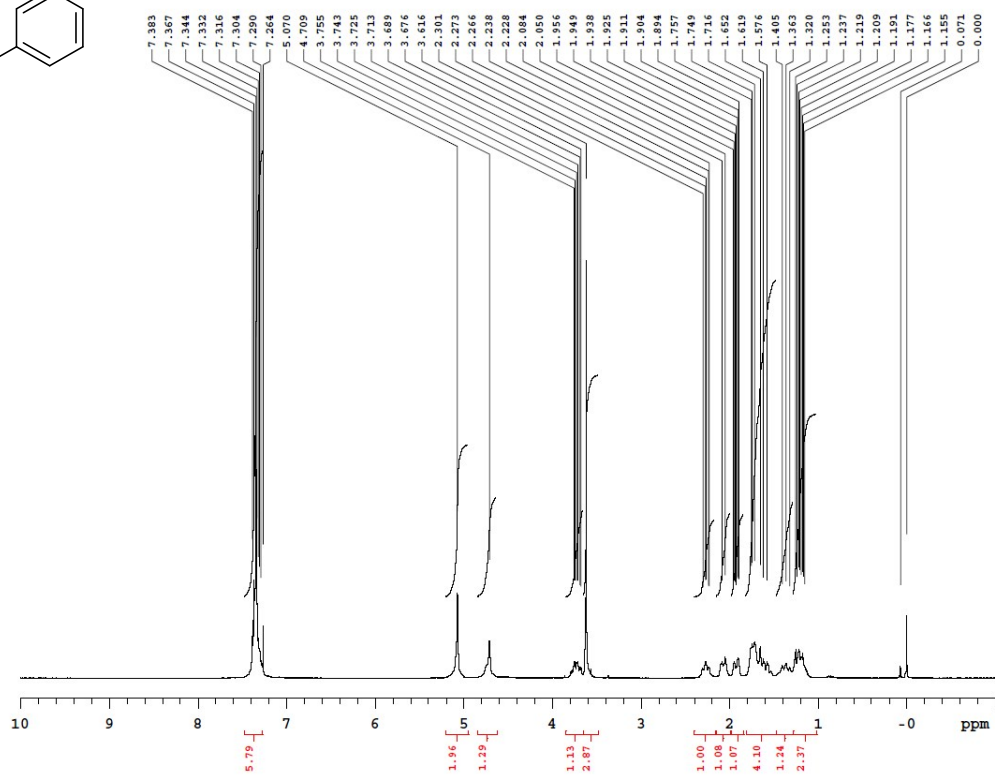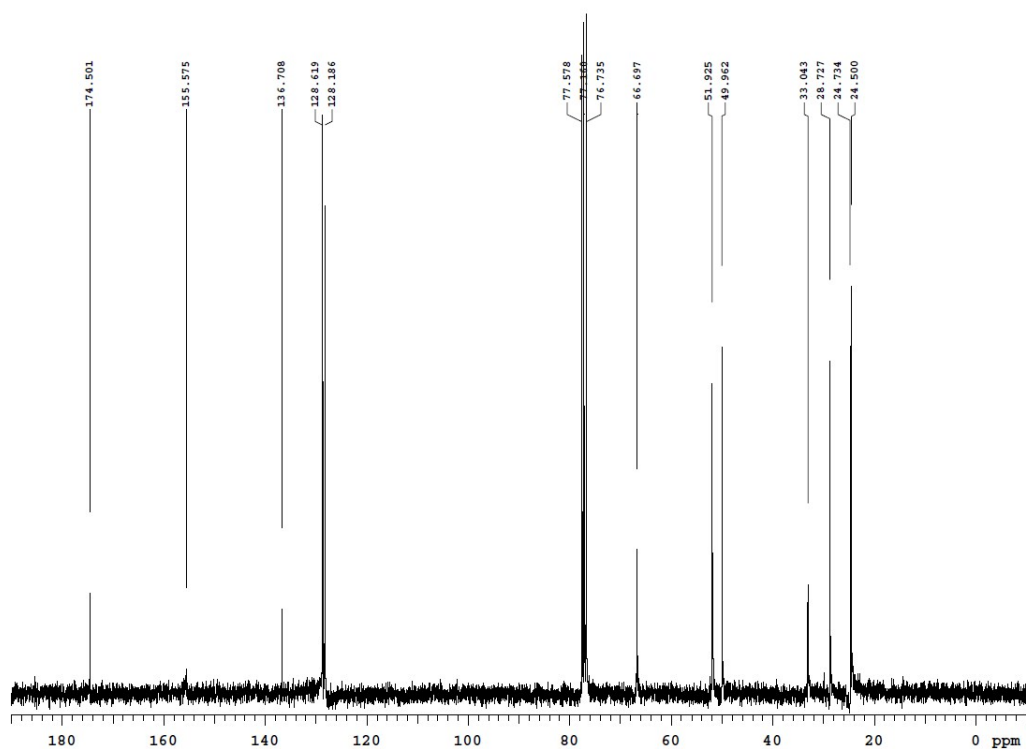

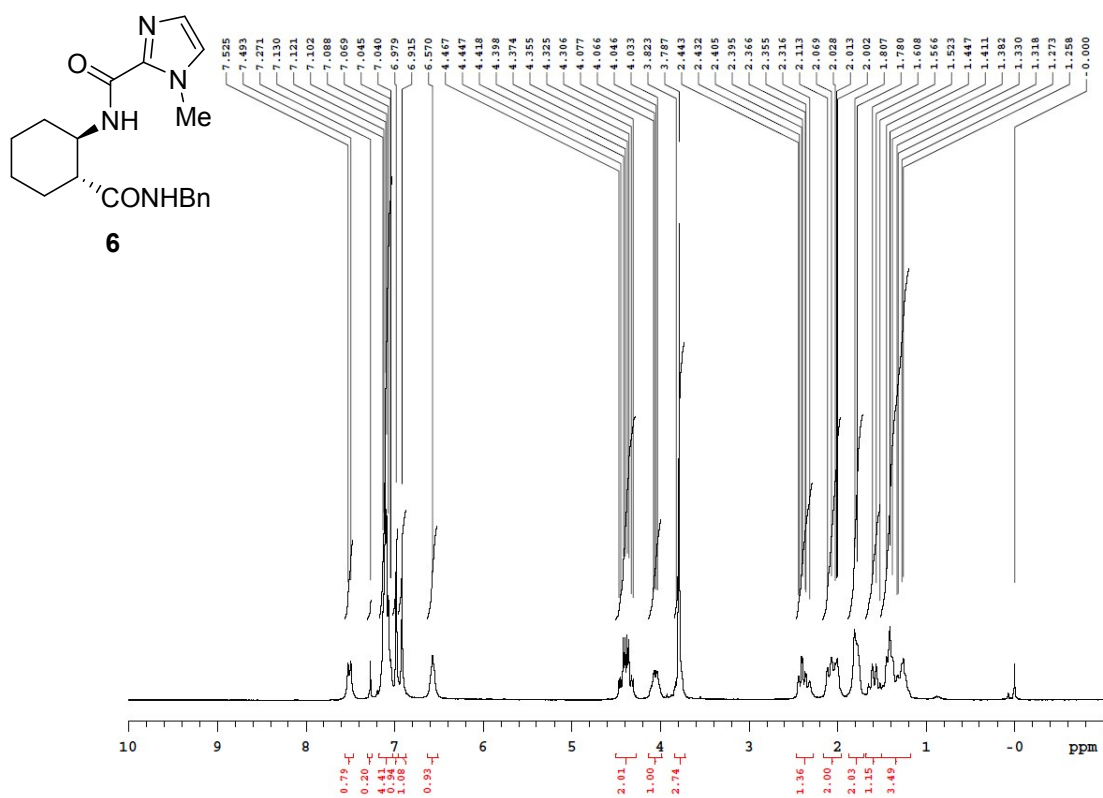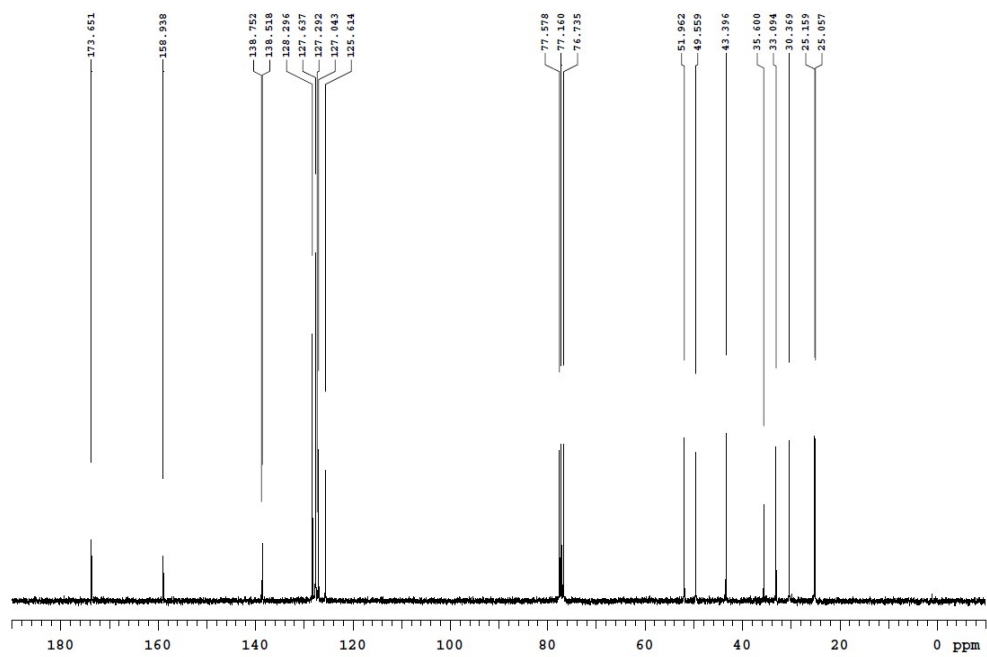

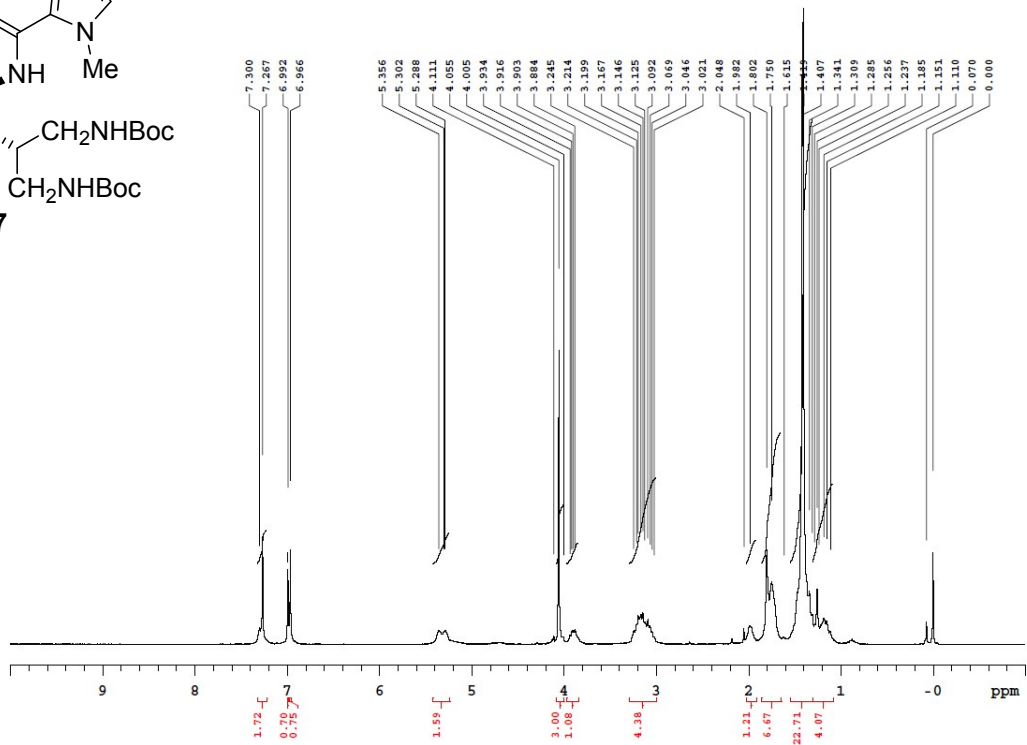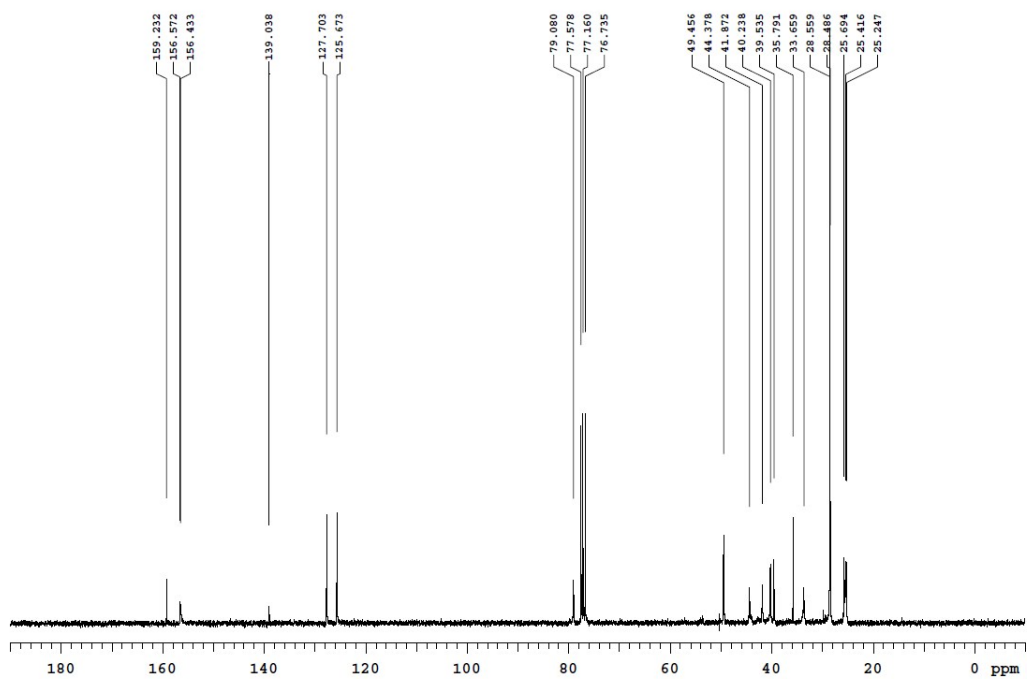

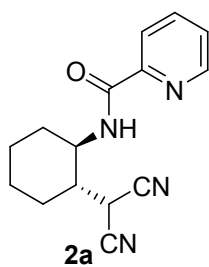

racemic-**2a**

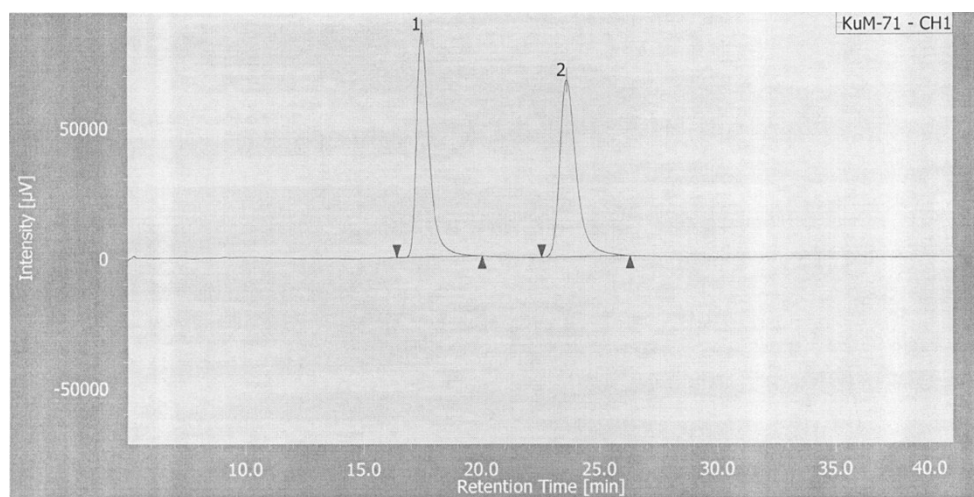

(1*R*,2*S*)-**2a**

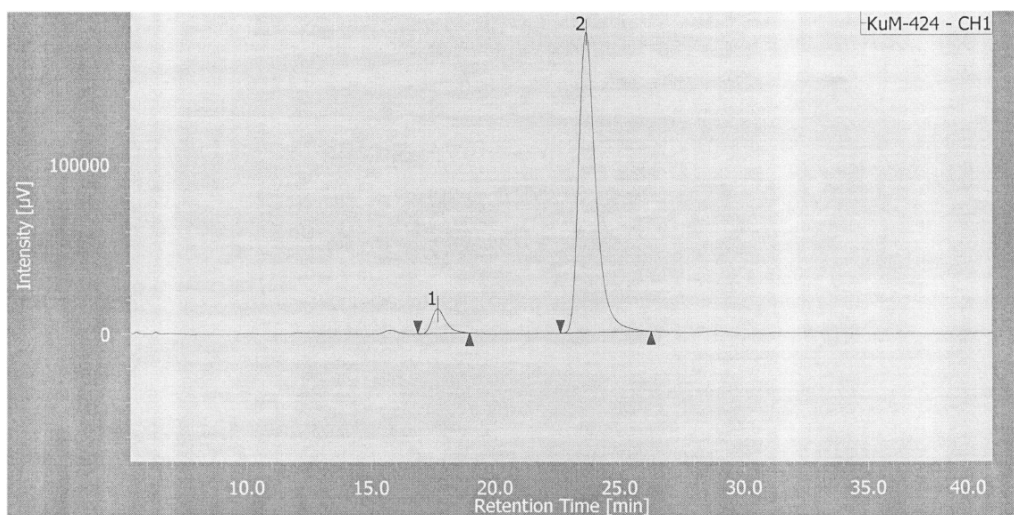

racemic-**2a**

| Peak | tR (min) | Area (%) |
|------|----------|----------|
| 1    | 17.5     | 49.4     |
| 2    | 23.6     | 50.6     |

(1*R*,2*S*)-**2a**

| Peak | tR (min) | Area (%) |
|------|----------|----------|
| 1    | 17.7     | 6.2      |
| 2    | 23.6     | 93.8     |

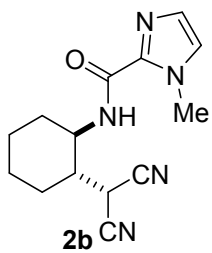

racemic-**2b**

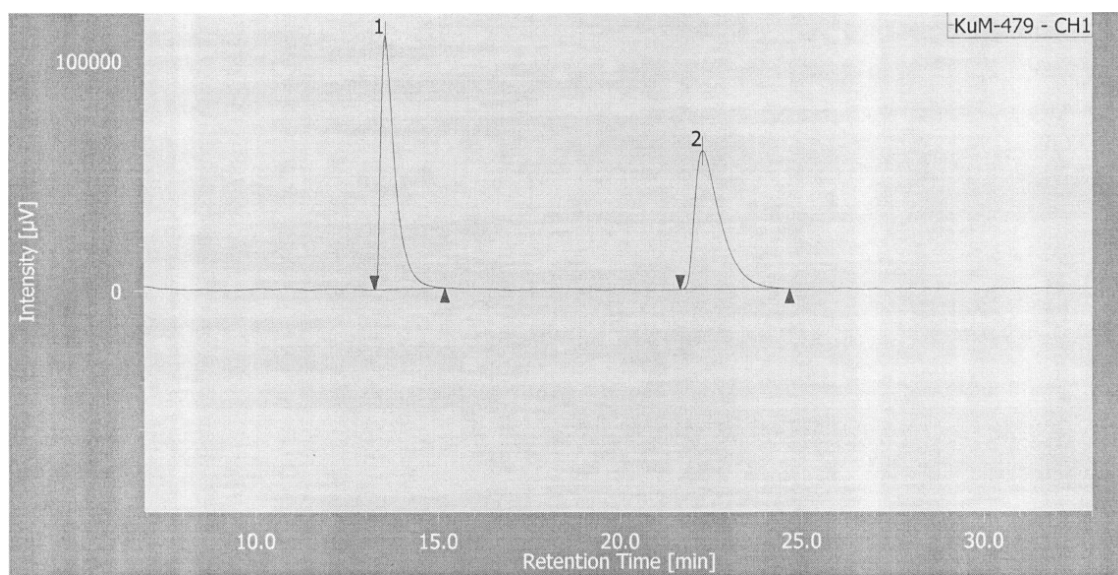

(1*R*,2*S*)-**2b**

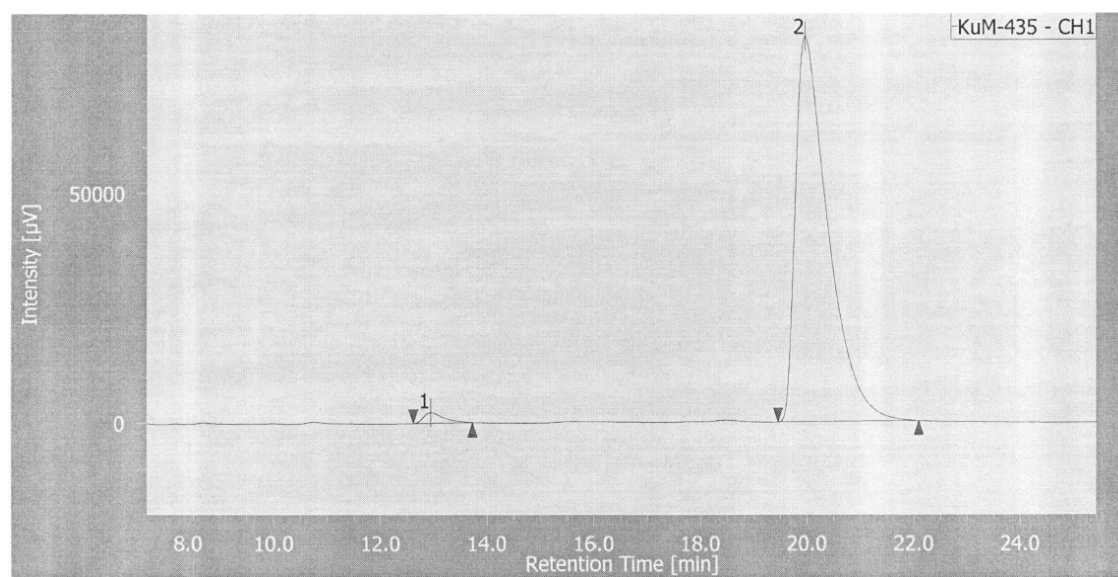

(1*S*,2*R*)-**2b**

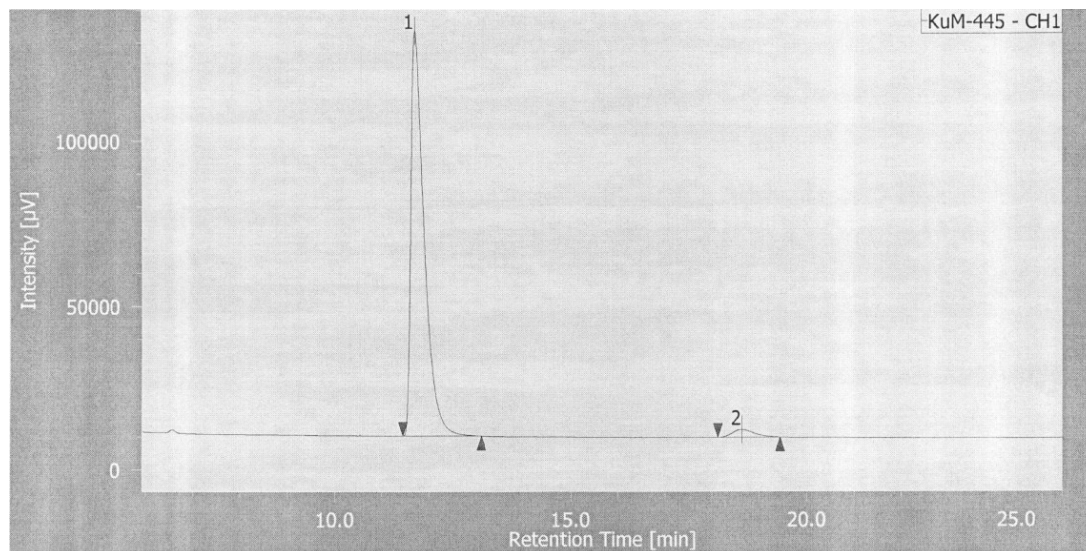

racemic-**2b**

| Peak | tR (min) | Area (%) |
|------|----------|----------|
| 1    | 14.0     | 49.9     |
| 2    | 23.1     | 50.1     |

(1*R*,2*S*)-**2b**

| Peak | tR (min) | Area (%) |
|------|----------|----------|
| 1    | 14.0     | 49.9     |
| 2    | 23.1     | 50.1     |

(1*S*,2*R*)-**2b**

| Peak | tR (min) | Area (%) |
|------|----------|----------|
| 1    | 11.7     | 97.0     |
| 2    | 18.6     | 3.0      |

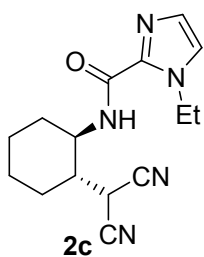

racemic-**2c**

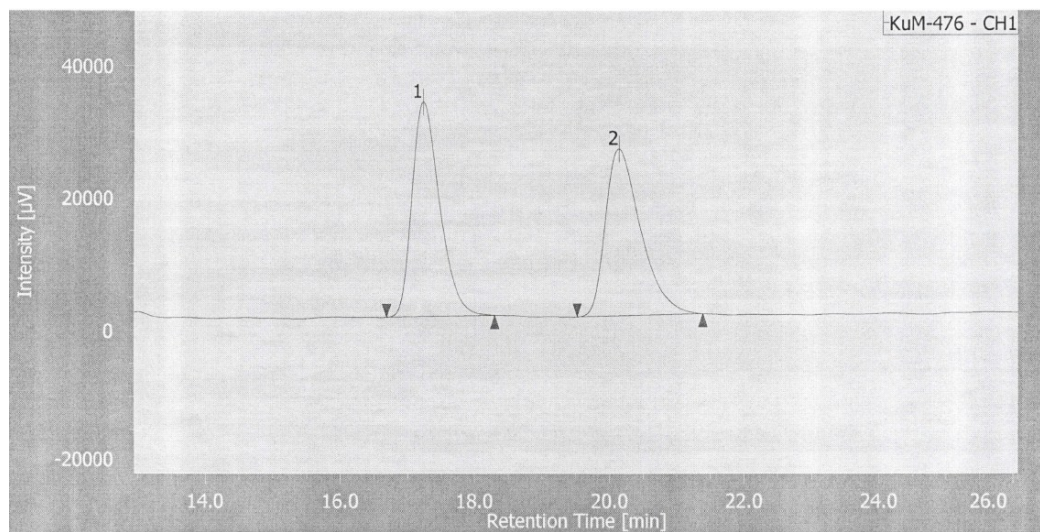

(1*R*,2*S*)-**2c**

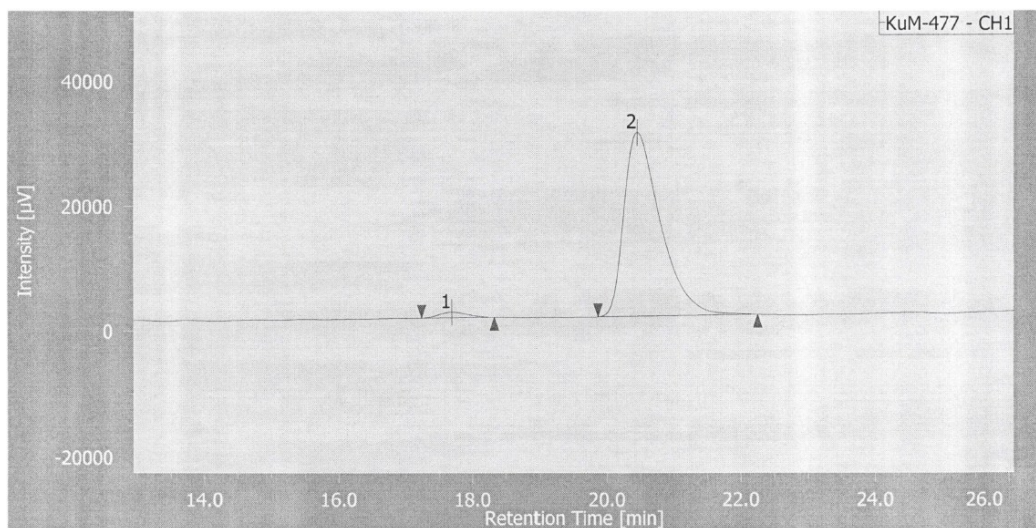

racemic-**2c**

| Peak | tR (min) | Area (%) |
|------|----------|----------|
| 1    | 17.2     | 50.3     |
| 2    | 20.1     | 49.7     |

(1*R*,2*S*)-**2c**

| Peak | tR (min) | Area (%) |
|------|----------|----------|
| 1    | 17.7     | 2.3      |
| 2    | 20.5     | 97.7     |

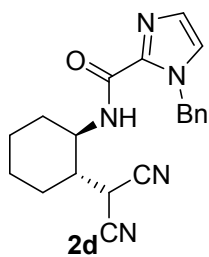

racemic-**2d**

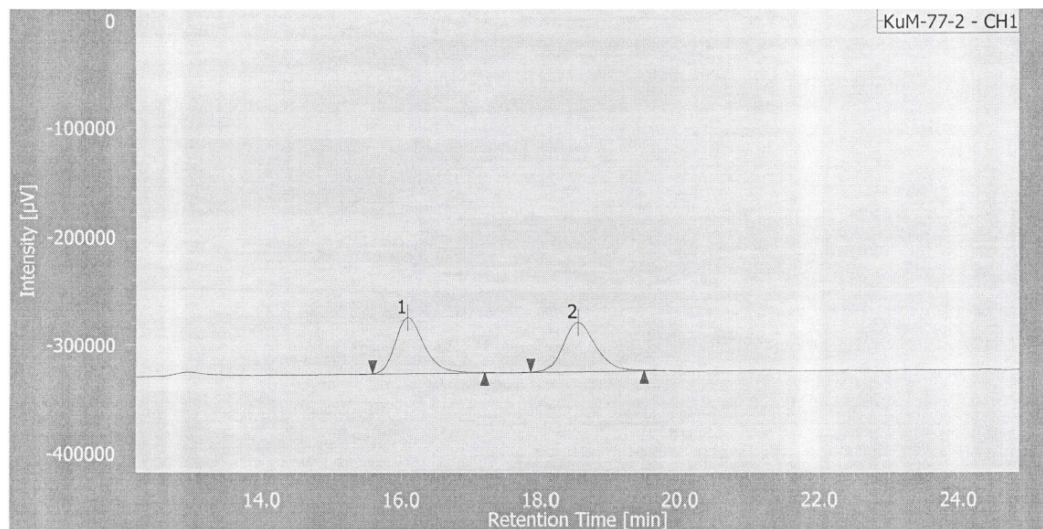

(1*R*,2*S*)-**2d**

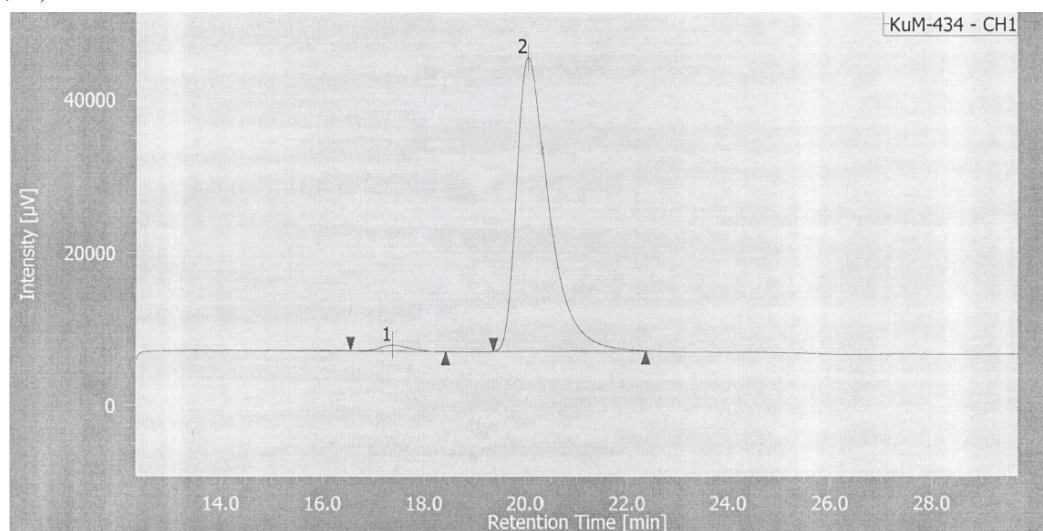

racemic-**2d**

| Peak | tR (min) | Area (%) |
|------|----------|----------|
| 1    | 16.1     | 50.1     |
| 2    | 18.5     | 49.9     |

(1*R*,2*S*)-**2d**

| Peak | tR (min) | Area (%) |
|------|----------|----------|
| 1    | 17.4     | 1.8      |
| 2    | 20.1     | 98.2     |

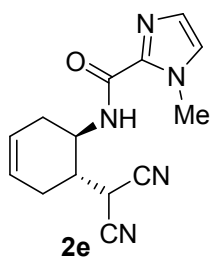

racemic-**2e**

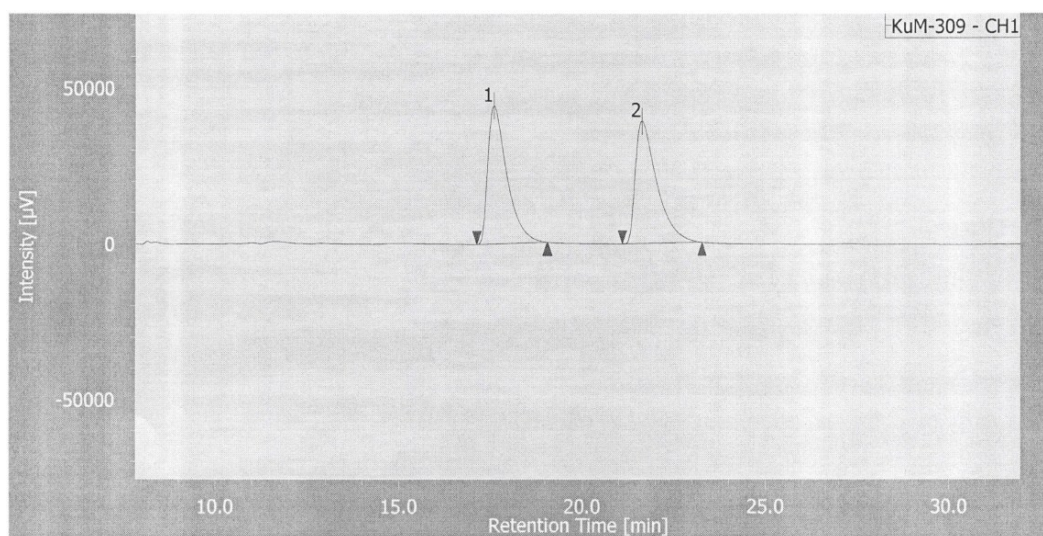

(1*R*,6*S*)-**2e**

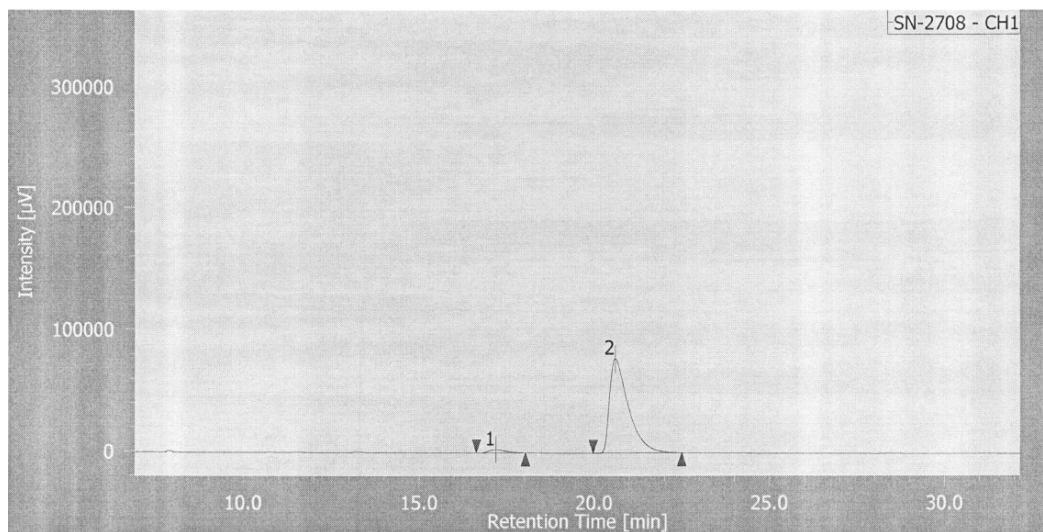

racemic-**2e**

| Peak | tR (min) | Area (%) |
|------|----------|----------|
| 1    | 17.6     | 50.0     |
| 2    | 21.6     | 50.0     |

(1*R*,6*S*)-**2e**

| Peak | tR (min) | Area (%) |
|------|----------|----------|
| 1    | 17.2     | 3.1      |
| 2    | 20.6     | 96.9     |

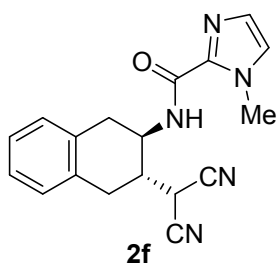

racemic-**2f**

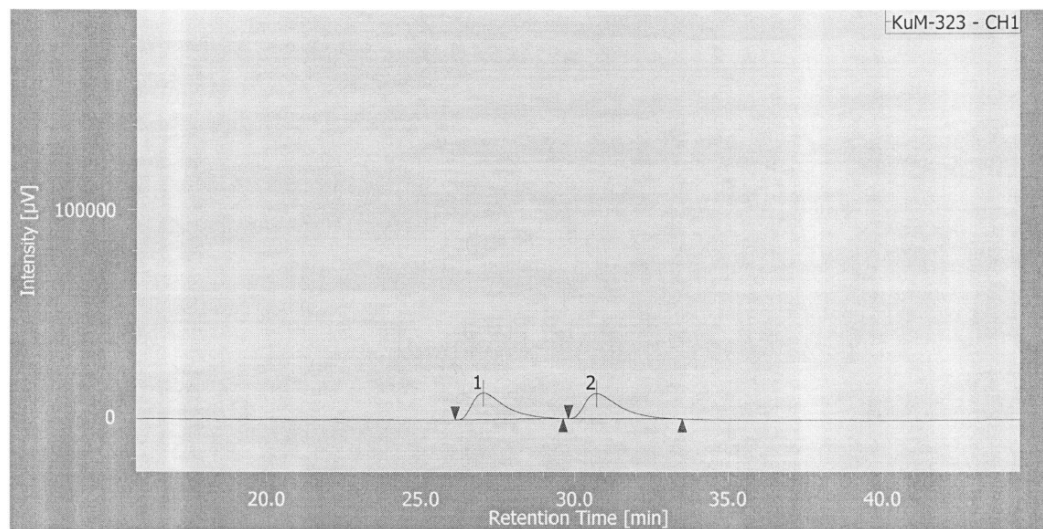

(2*R*,3*S*)-**2f**

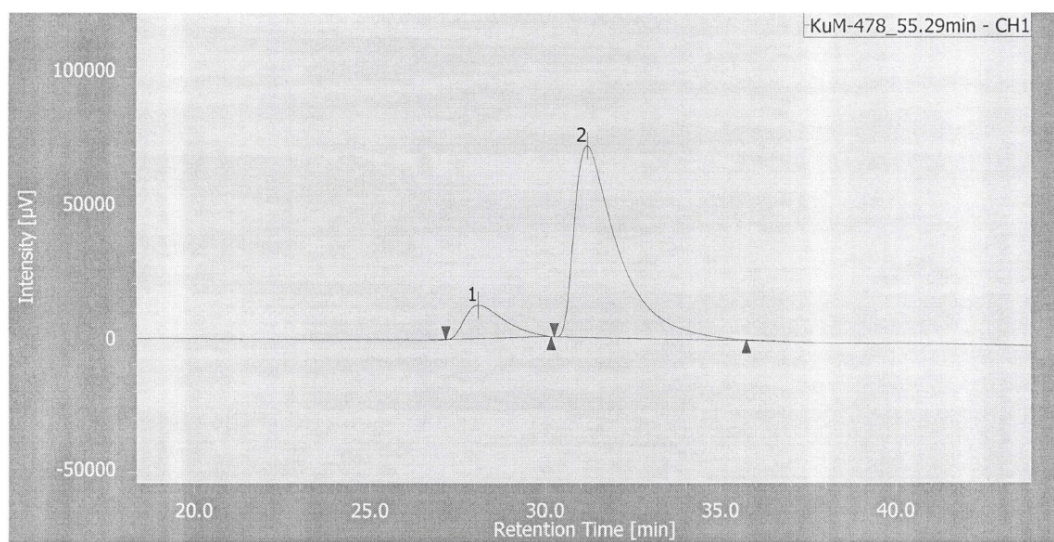

racemic-**2f**

| Peak | tR (min) | Area (%) |
|------|----------|----------|
| 1    | 27.0     | 50.2     |
| 2    | 30.7     | 49.8     |

(2*R*,3*S*)-**2f**

| Peak | tR (min) | Area (%) |
|------|----------|----------|
| 1    | 28.1     | 13.6     |
| 2    | 31.2     | 86.4     |

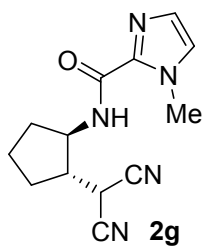

racemic-**2g**

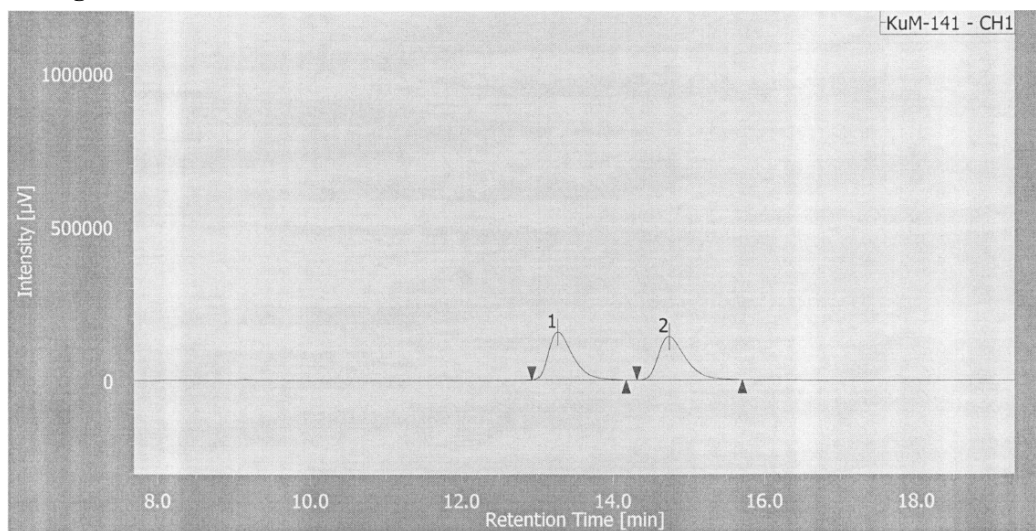

(1*R*,2*S*)-**2g**

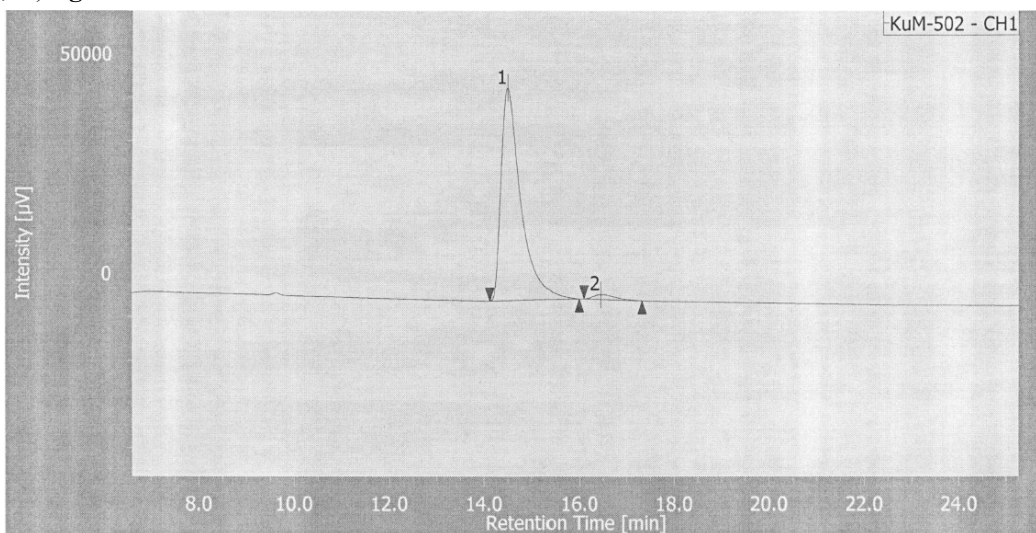

racemic-**2g**

| Peak | tR (min) | Area (%) |
|------|----------|----------|
| 1    | 13.3     | 50.1     |
| 2    | 14.7     | 49.9     |

(1*R*,2*S*)-**2g**

| Peak | tR (min) | Area (%) |
|------|----------|----------|
| 1    | 14.5     | 97.4     |
| 2    | 16.5     | 2.6      |

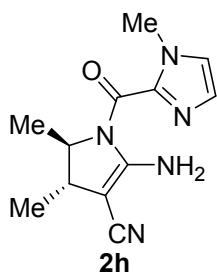

racemic-**2h**

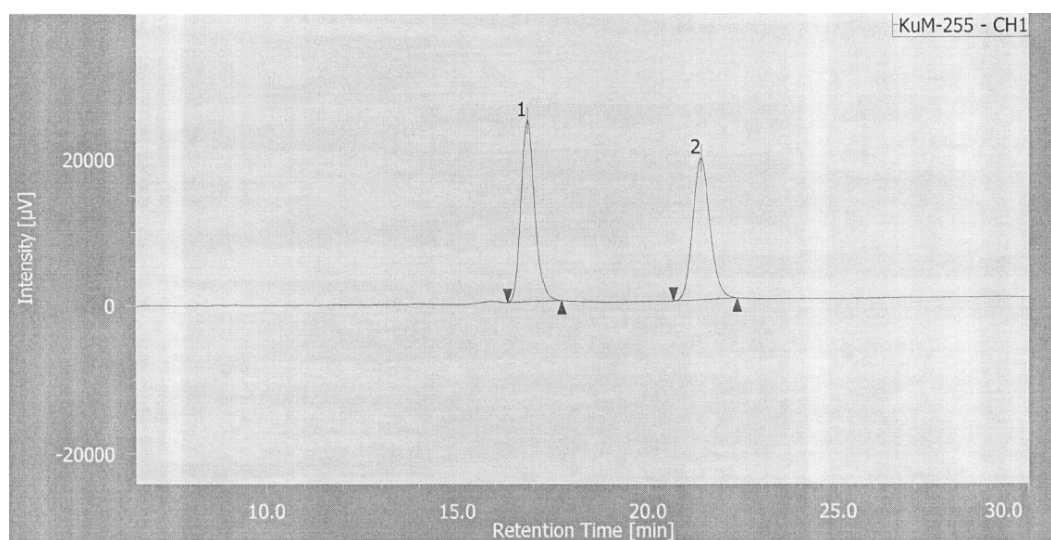

(4*S*,5*R*)-**2h**

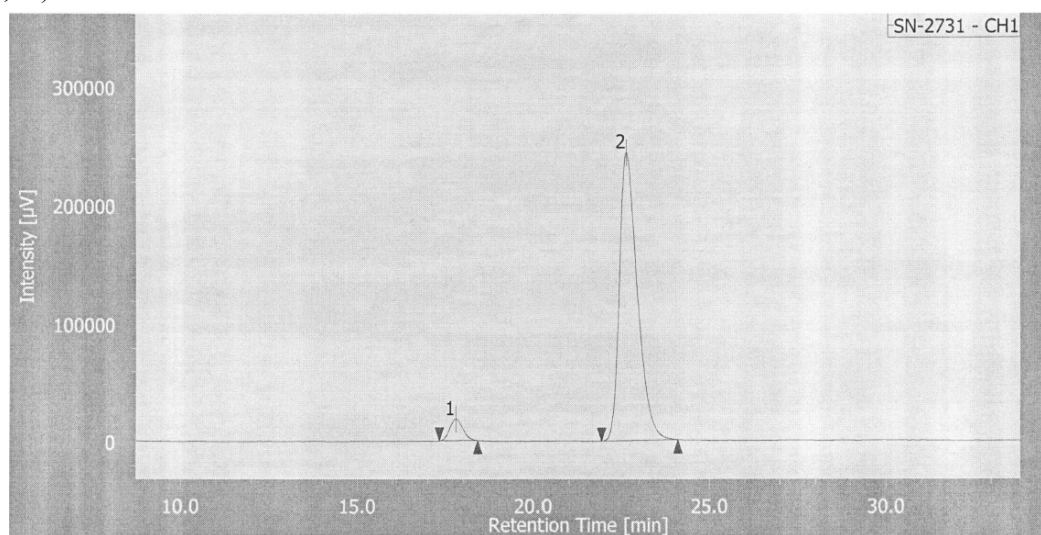

racemic-**2h**

| Peak | tR (min) | Area (%) |
|------|----------|----------|
| 1    | 16.9     | 50.1     |
| 2    | 21.4     | 49.9     |

(4*S*,5*R*)-**2h**

| Peak | tR (min) | Area (%) |
|------|----------|----------|
| 1    | 17.8     | 5.2      |
| 2    | 22.6     | 94.8     |

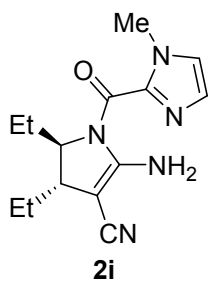

racemic-**2i**

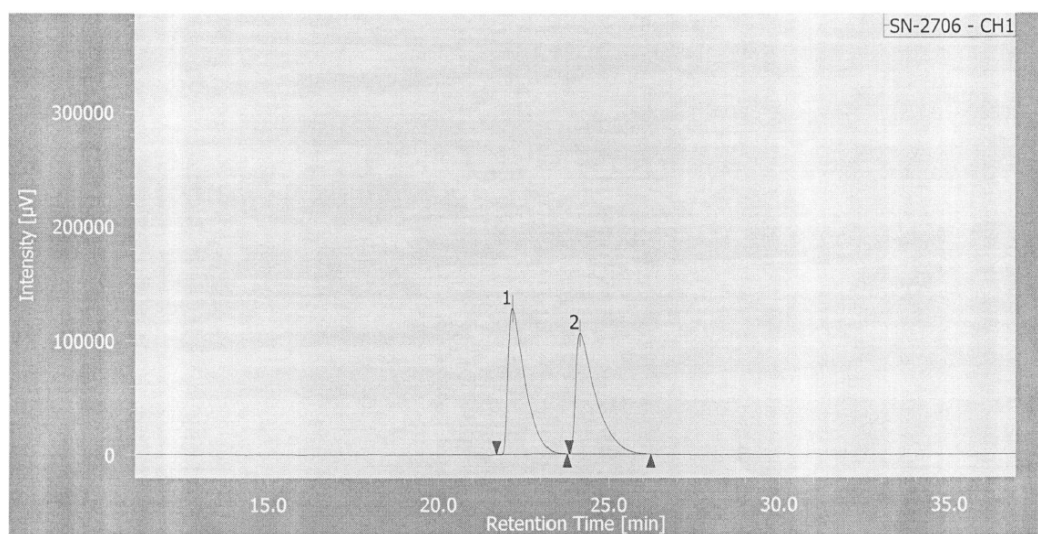

(4*S*,5*R*)-**2i**

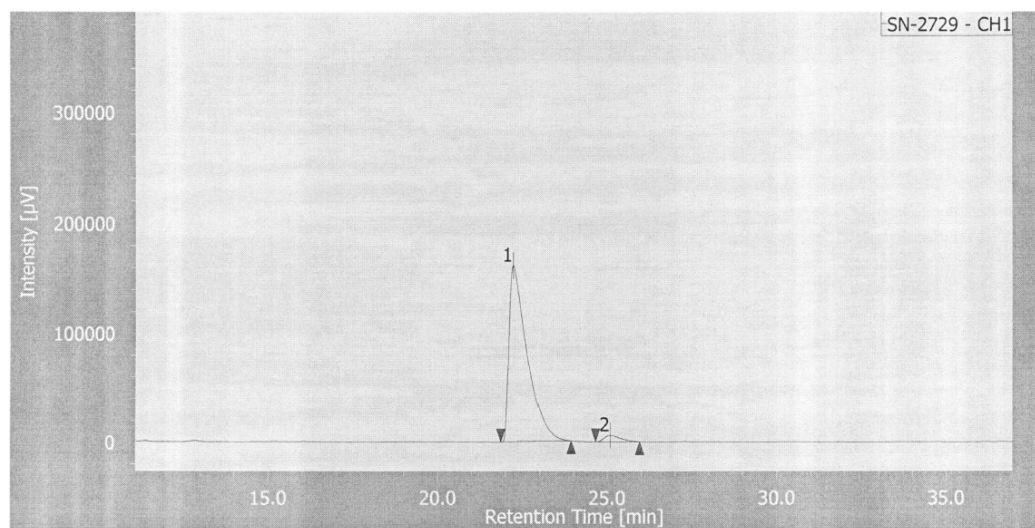

racemic-**2i**

| Peak | tR (min) | Area (%) |
|------|----------|----------|
| 1    | 22.2     | 50.2     |
| 2    | 24.1     | 49.8     |

(4*S*,5*R*)-**2i**

| Peak | tR (min) | Area (%) |
|------|----------|----------|
| 1    | 22.2     | 96.9     |
| 2    | 25.1     | 3.1      |

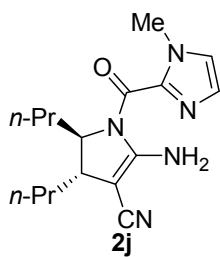

racemic-**2j**

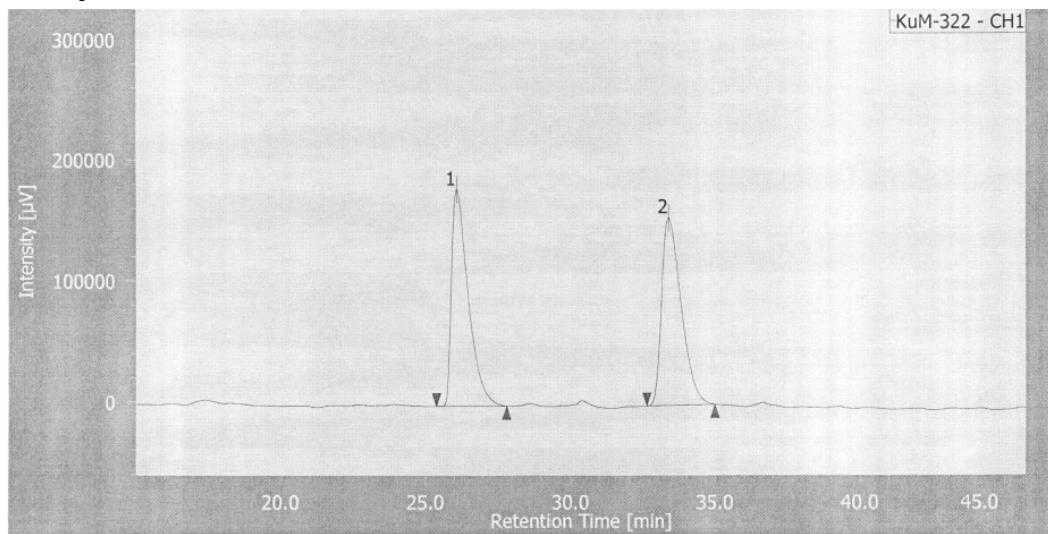

(4*S*,5*R*)-**2j**

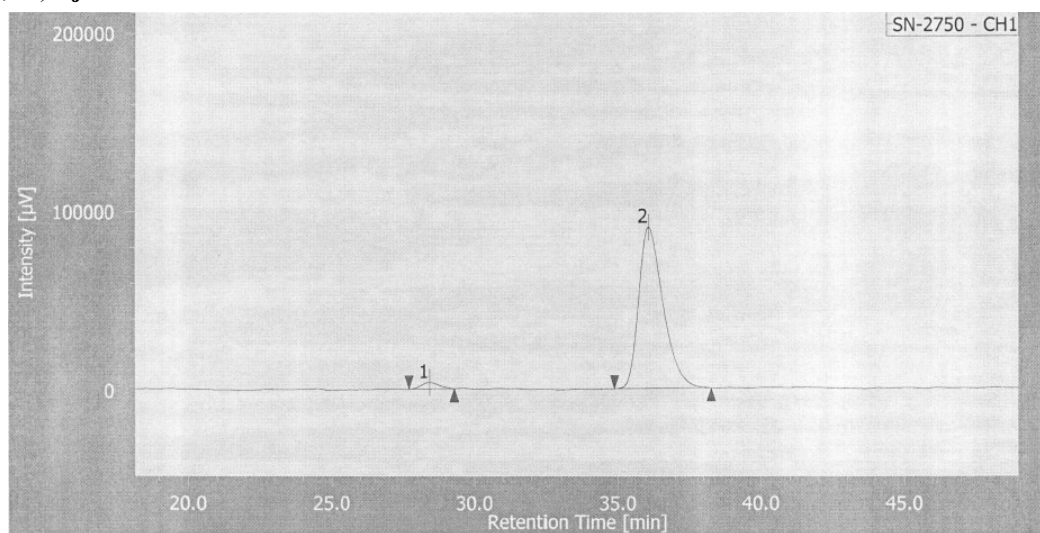

racemic-**2j**

| Peak | tR (min) | Area (%) |
|------|----------|----------|
| 1    | 26.1     | 48.9     |
| 2    | 33.4     | 50.1     |

(4*S*,5*R*)-**2j**

| Peak | tR (min) | Area (%) |
|------|----------|----------|
| 1    | 28.4     | 2.8      |
| 2    | 36.1     | 97.2     |

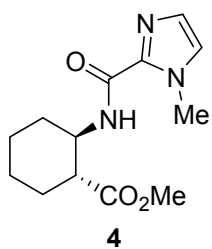

racemic-**4**

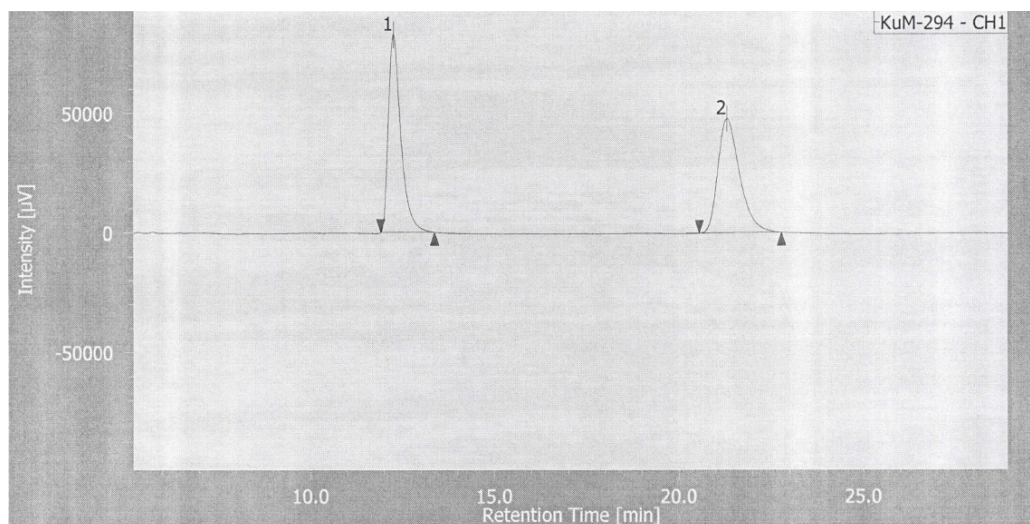

(1*R*,2*R*)-**4**

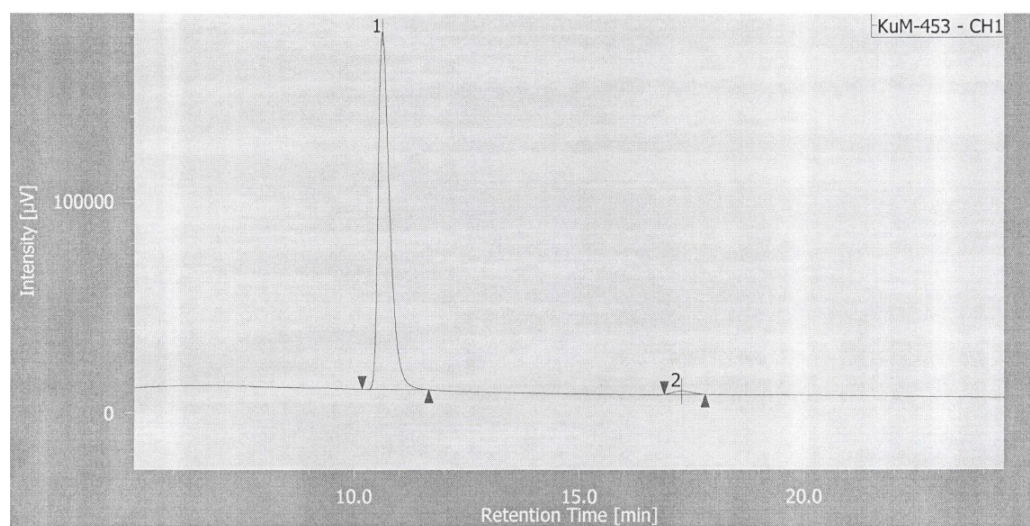

racemic-**4**

| Peak | tR (min) | Area (%) |
|------|----------|----------|
| 1    | 12.3     | 49.9     |
| 2    | 21.3     | 50.1     |

(1*R*,2*R*)-**4**

| Peak | tR (min) | Area (%) |
|------|----------|----------|
| 1    | 10.6     | 98.5     |
| 2    | 17.3     | 1.5      |

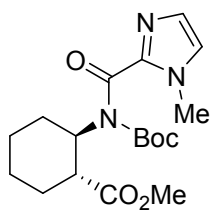

racemic

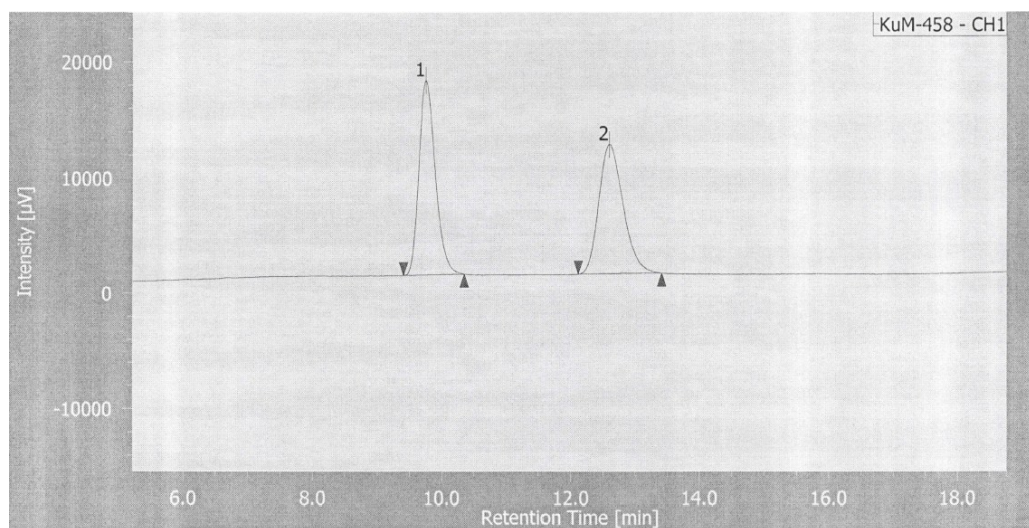

(1*R*,2*R*)

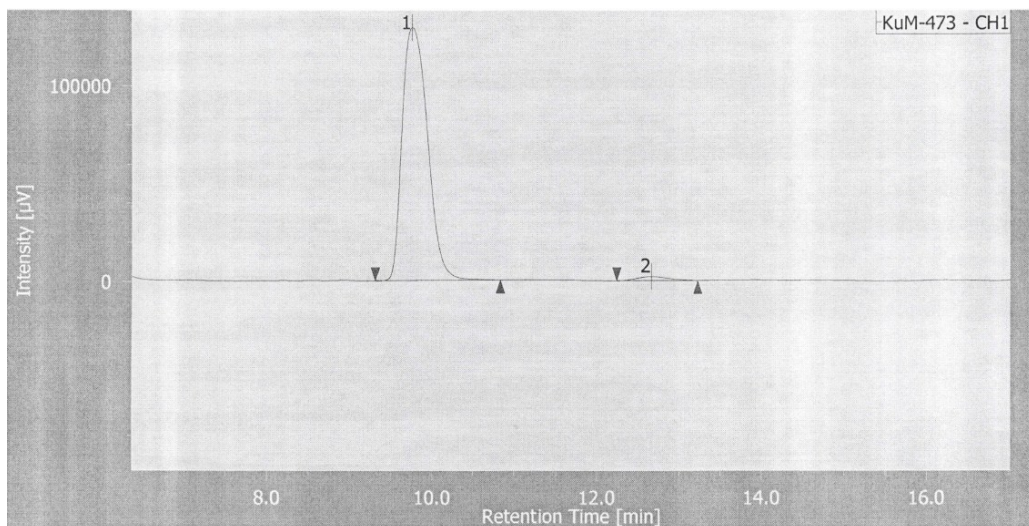

racemic-4

| Peak | tR (min) | Area (%) |
|------|----------|----------|
| 1    | 9.8      | 50.2     |
| 2    | 12.6     | 49.8     |

(1*R*,2*R*)-4

| Peak | tR (min) | Area (%) |
|------|----------|----------|
| 1    | 9.8      | 98.1     |
| 2    | 12.7     | 1.9      |

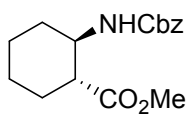

racemic

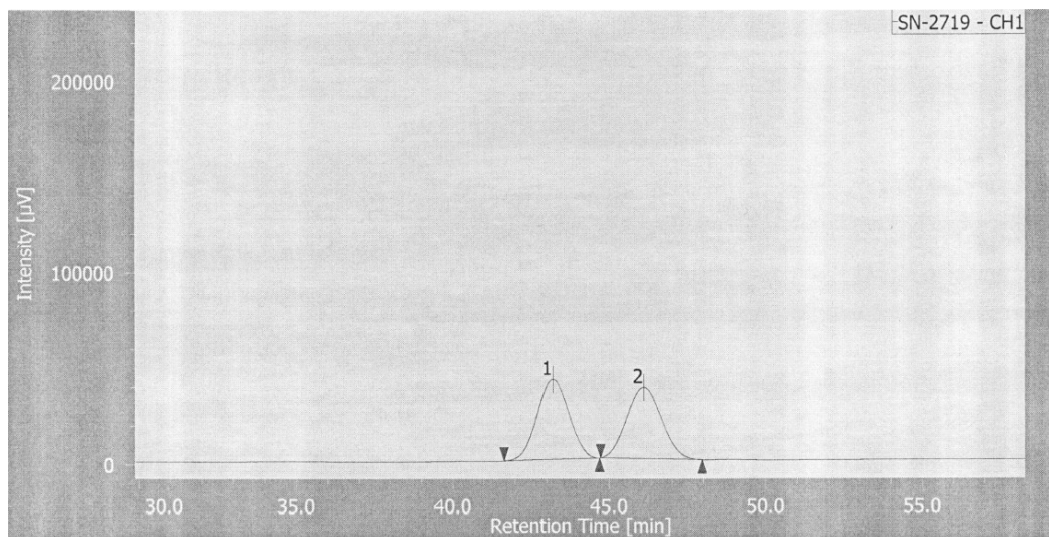

(1*R*,2*R*)

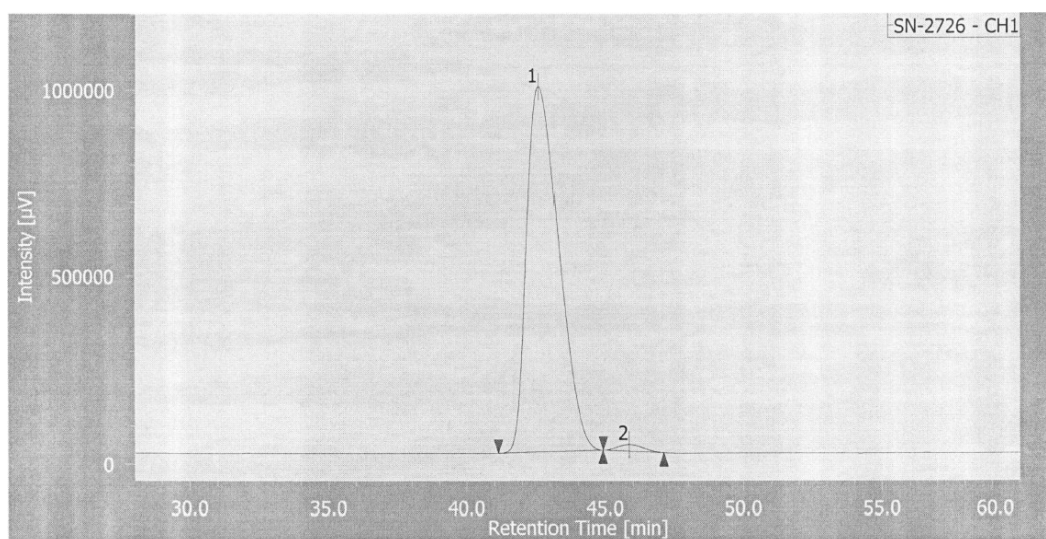

racemic

| Peak | tR (min) | Area (%) |
|------|----------|----------|
| 1    | 43.2     | 50.5     |
| 2    | 46.1     | 49.5     |

(1*R*,2*R*)

| Peak | tR (min) | Area (%) |
|------|----------|----------|
| 1    | 42.6     | 98.6     |
| 2    | 45.9     | 1.4      |

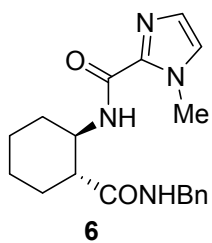

racemic-**6**

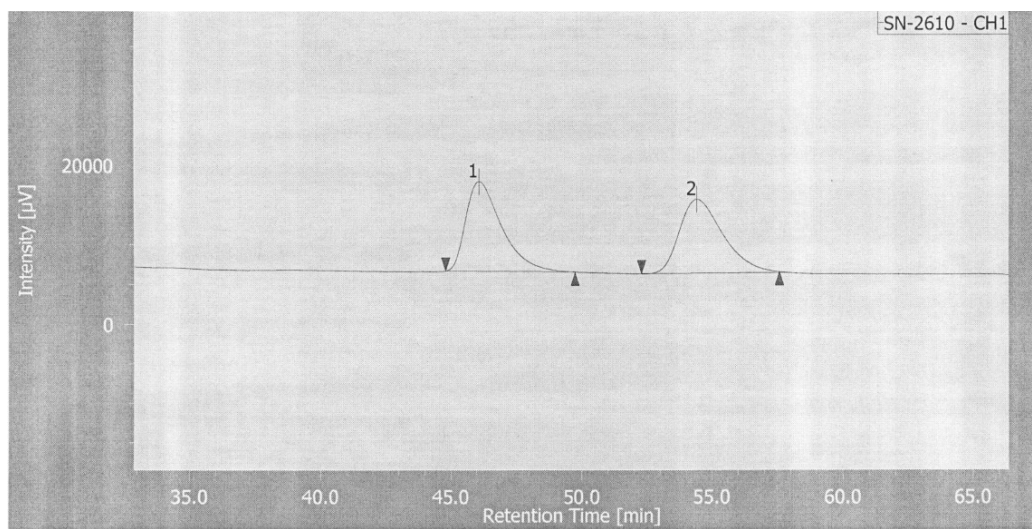

(1*R*,2*R*)-**6**

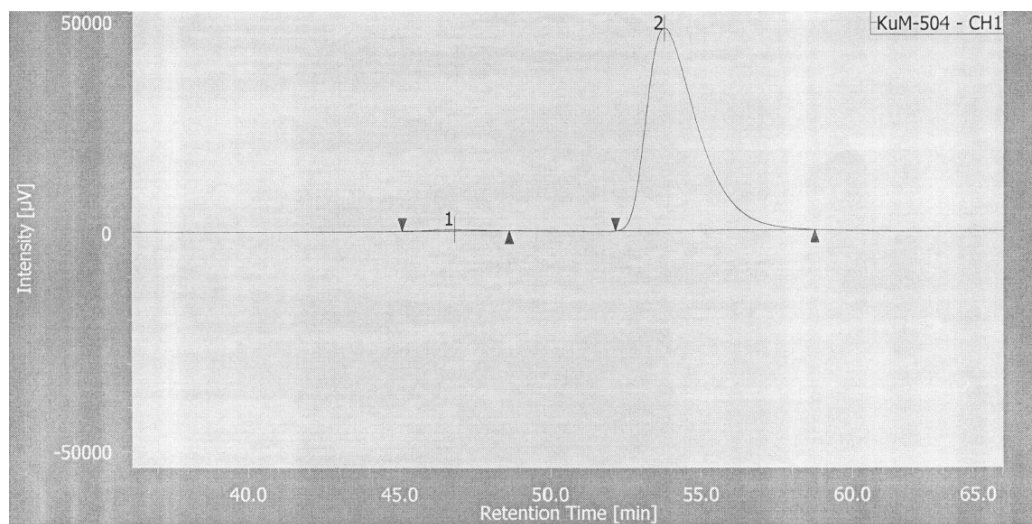

racemic-**6**

| Peak | tR (min) | Area (%) |
|------|----------|----------|
| 1    | 46.1     | 50.0     |
| 2    | 54.4     | 50.0     |

(1*R*,2*R*)-**6**

| Peak | tR (min) | Area (%) |
|------|----------|----------|
| 1    | 46.8     | 0.7      |
| 2    | 53.8     | 99.3     |

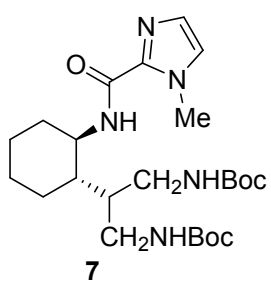

racemic-7

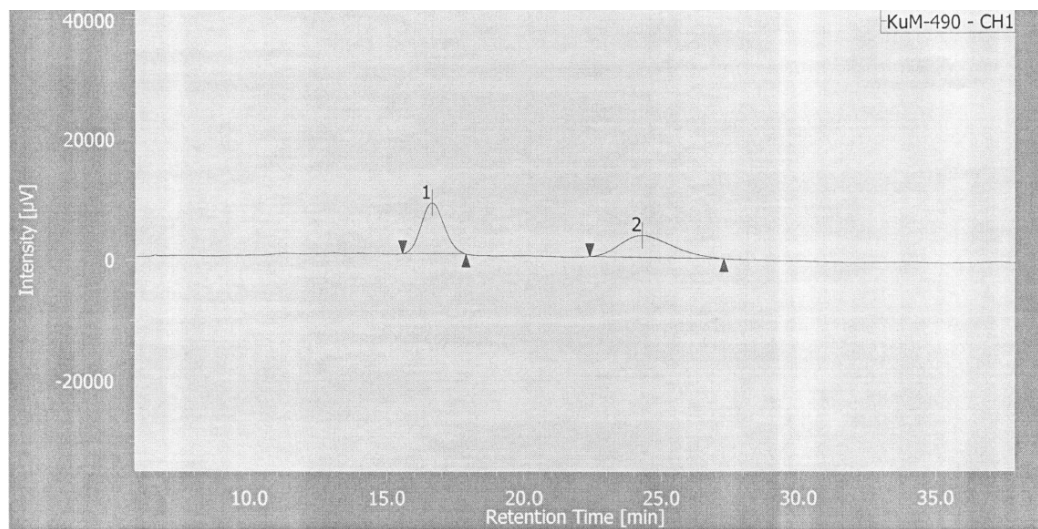

(1*S*,2*R*)-7

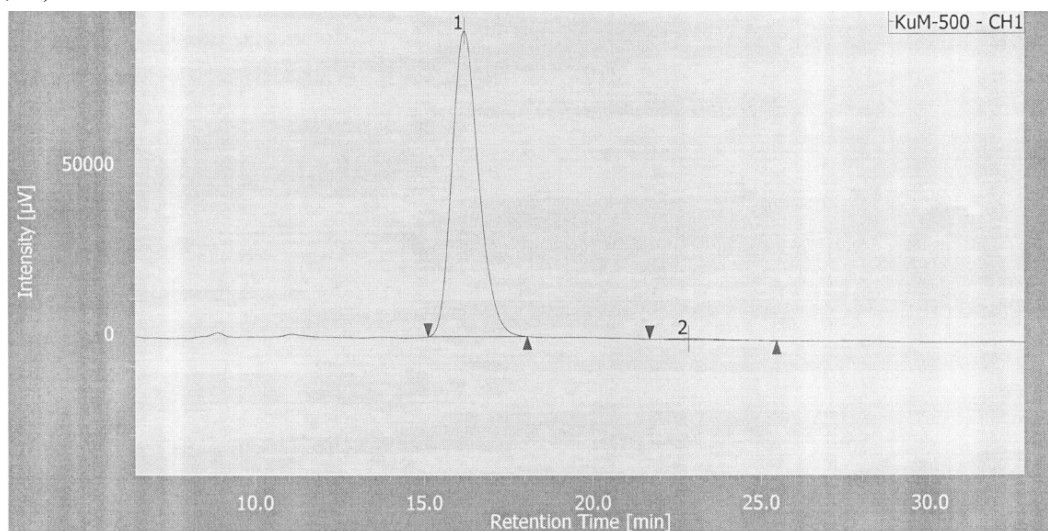

racemic-7

| Peak | tR (min) | Area (%) |
|------|----------|----------|
| 1    | 16.6     | 50.0     |
| 2    | 24.3     | 50.0     |

(1*S*,2*R*)-7

| Peak | tR (min) | Area (%) |
|------|----------|----------|
| 1    | 16.2     | 99.3     |
| 2    | 22.9     | 0.7      |
